# Supplementary material
Source: HighWire-hosted journal article supplement (doi:10.1101/rna.080450.125)
Supplement: Supplemental_Data_File_1.xlsx [file Supplemental_Data_File_1.xlsx]

## Sheet: Ucount Ala-G35C_vs_WT-Ala-AGC
#Gene biotype: tRNA #Count type: ucount #Condition pair: FH-Ala-G35C_vs_FH-WT-Ala-AGC-6-1 Column A: Isodecoder, The name of tRNA isodecoder (tRNA bearing the same anticodons but with sequence variations in the tRNA body). Column B: Isotype, The name of tRNA isotype (tRNA encoding the same amino acid). Column C: Isoacceptor, The name of tRNA isoacceptor (tRNA carrying the same amino acids but with…
Annotation											DE Statistic						CPM
Isodecoder	Isotype	Isoacceptor	Codon	Source	Locus	Stand	Sequence	Structure	tRNAscanScore	tRNAscanSSS	log2FC	Fold_Change	p_value	q_value	FH-Ala-G35C_CPM	FH-WT-Ala-AGC-6-1_CPM	FH-WT-Ala-AGC-6-1-2	FH-WT-Ala-AGC-6-1-3	FH-WT-Ala-AGC-6-1-4	FH-Ala-G35C-1	FH-Ala-G35C-2	FH-Ala-G35C-3
mtdbD00002042-Phe-GAA	Phe	Phe-GAA	TTC,TTT	mttRNAdb	chrM	.	GTTAATGTAGCTTAATAACAAAGCAAAGCACTGAAAATGCTTAGATGGATAATTGTATCCCATAAACACCA	(((.(((..((((.......)))).(((((.......)))))....(((((....)))))))).)))....	.	.	-0.035802	0.975489	0.89071	0.995715	10.5652	10.601	1397.26	2102.33	1464.21	1102.81	1900.62	1320.72
mtdbD00002043-Val-TAC	Val	Val-TAC	GTA,GTG	mttRNAdb	chrM	.	CATAGTGTAGCTTAATATTAAAGCATCTGGCCTACACCCAGAAGATTTCATGACCAATGAACACTCTGACCA	((.((((..((((.......)))).(((((.......)))))....(((((.....))))))))).))....	.	.	0.166531	1.12236	0.569409	0.995715	13.996	13.8295	12698.7	17767.8	15993.9	15791.9	17965.1	11492.8
mtdbD00002044-Leu-TAA	Leu	Leu-TAA	TTA,TTG	mttRNAdb	chrM	.	ATTAGGGTGGCAGAGCCAGGAAATTGCGTAAGACTTAAAACCTTGTTCCCAGAGGTTCAAATCCTCTCCCTAATACCA	(((((((..((((..........))))(((((.........)))))....(((((.......))))))))))))....	.	.	-0.117746	0.921626	0.623669	0.995715	11.598	11.7158	3086.31	3664.17	3971.65	1903.08	3757.38	3324.82
mtdbD00002045-Ile-GAT	Ile	Ile-GAT	ATA,ATC,ATT	mttRNAdb	chrM	.	AGAAATATGTCTGATAAAAGAATTACTTTGATAGAGTAAATTATAGAGGTTCAAGCCCTCTTATTTCTACCA	(((((((..(((......))).(((((.......))))).....(((((.......))))))))))))....	.	.	-0.150456	0.900966	0.505748	0.995715	13.7941	13.9445	14713.9	18081.4	17503.6	9698.39	16372.5	14777.5
mtdbD00002046-Gln-TTG	Gln	Gln-TTG	CAA,CAG	mttRNAdb	chrM	.	TAGGATAAGGTGTTTAGGTAGCACGGAGAATTTTGAATTCTTAAGTGTAGGTTCAATTCCTATTGTCCTAGCCA	(((((((..((((.......)))).(((((.......)))))....(((((.......))))))))))))....	.	.	0.381125	1.30236	0.288896	0.995715	13.9958	13.6146	11685.8	13641.1	14668.1	19976.2	10272.8	13735.3
mtdbD00002047-Met-CAT	Met	Met-CAT	ATG	mttRNAdb	chrM	.	AGTAAGGTCAGCTAATTAAGCTATCGGGCCCATACCCCGAAAACGTTGGTTTAAATCCTTCCCGTACTACCA	((((.((..((((.....)))).(((((.......)))))....(..((.......))..))).))))....	.	.	0.34437	1.2696	0.186913	0.995715	11.5802	11.2358	2215.69	2717.83	2757.15	2911.96	3266.56	2327.97
mtdbD00002048-Trp-TCA	Trp	Trp-TCA	TGA,TGG	mttRNAdb	chrM	.	AGAAGTTTAGGATATACTAGTCCGCGAGCCTTCAAAGCCCTAAGAAAACACACAAGTTTAACTTCTGCCA	(((((((..((((......))))..(.((.......)).).....((((......)))))))))))....	.	.	0.388474	1.30901	0.181845	0.995715	11.0308	10.6423	1324.91	1701.29	2063.39	1461.47	2859.29	1663.15
mtdbD00002049-Ala-TGC	Ala	Ala-TGC	GCA,GCG	mttRNAdb	chrM	.	GAGGTCTTAGCTTAATTAAAGCAATTGATTTGCATTCAATAGATGTAGGATGAAGTCTTACAGTCCTTACCA	((((.((..((((.....)))).(((((.......)))))....(((((.......))))))).))))....	.	.	0.986462	1.98132	0.0232628	0.475595	14.0161	13.0296	8453.55	9023.85	9194.71	22567.4	11655.4	9441.13
mtdbD00002050-Asn-GTT	Asn	Asn-GTT	AAC,AAT	mttRNAdb	chrM	.	TAGATTGAAGCCAGTAATAGGGTATTTAGCTGTTAACTAAATTTTCGTAGGTTTAATTCCTGCCAATCTAGCCA	(((((((..(((........)))((((((.......))))))....(((((.......))))))))))))....	.	.	0.679927	1.60206	0.0137762	0.422591	11.6526	10.9727	1698.54	2276.4	2430.16	2940.01	3638.33	2402.25
mtdbD00002051-Cys-GCA	Cys	Cys-GCA	TGC,TGT	mttRNAdb	chrM	.	GGTCTTAAGGTGATATTCATGTCGAATTGCAAATTCGAAGGTGTAGAGAAATCTCTACTAAGACTTCCA	(((((((..((((...)))).(((((.......)))))....(((((......))))))))))))....	.	.	0.680753	1.60298	0.129816	0.995715	11.5563	10.8756	2067.42	1781.11	2139.51	4220.93	1713.69	1978.85
mtdbD00002052-Tyr-GTA	Tyr	Tyr-GTA	TAC,TAT	mttRNAdb	chrM	.	GGTAAAATGGCTGAGTAAGCATTAGACTGTAAATCTAAACACAGAGGTTTAAATCCTCTTTTTACCACCA	(((((((..(((.....))).(((((.......)))))....(((((.......))))))))))))....	.	.	0.434857	1.35178	0.0905204	0.995715	13.5384	13.1035	8621.98	8885.36	10541.9	11176.9	12419.8	9508.73
mtdbD00002053-Ser-TGA	Ser	Ser-TGA	TCA,TCG	mttRNAdb	chrM	.	GAGAAAGACATATAGGATATGAGATTGGCTTGAAACCAATTTTAGGGGGTTCGATTCCTTCCTTTCTTACCA	(((((((.((((.....)))).((((((.......)))))*...(((((.......))))))))))))....	.	.	0.114233	1.0824	0.628329	0.995715	15.9552	15.841	56099.2	61719.6	69300.6	57724.3	58997.6	61129.7
mtdbD00002054-Asp-GTC	Asp	Asp-GTC	GAC,GAT	mttRNAdb	chrM	.	AAGATATTAGTAAAATCAATTACATAACTTTGTCAAAGTTAAATTATAGATCAATAATCTATATATCTTACCA	(((((((..((((......)))).(((((.......)))))....(((((.......))))))))))))....	.	.	0.703783	1.62877	0.0139264	0.422591	8.71693	8.01315	257.39	287.555	278.54	303.761	585.851	310.495
mtdbD00002055-Lys-TTT	Lys	Lys-TTT	AAA,AAG	mttRNAdb	chrM	.	CACTATGAAGCTAAGAGCGTTAACCTTTTAAGTTAAAGTTAGAGACCTTAAAATCTCCATAGTGACCA	(((((((..(((...))).(((((.......))))).....((((........)))))))))))....	.	.	0.0462863	1.0326	0.838602	0.995715	10.9613	10.915	1863.41	1813.81	2468.8	1712.77	1918.38	1987.02
mtdbD00002056-Gly-TCC	Gly	Gly-TCC	GGA,GGG	mttRNAdb	chrM	.	ACTCCCTTAGTATAATTAATATAACTGACTTCCAATTAGTAGATTCTGAATAAACCCAGAAGAGAGTACCA	((((.((..((((.....)))).(((((.......)))))....((((........)))))).))))....	.	.	0.43311	1.35014	0.141169	0.995715	15.0178	14.5847	23497.2	25748.2	29082.4	36059.7	28114.6	26545.1
mtdbD00002057-Arg-TCG	Arg	Arg-TCG	CGA,CGG	mttRNAdb	chrM	.	TGGTAATTAGTTTAAAAAAAATTAATGATTTCGACTCATTAGATTATGATGATGTTCATAATTACCAACCA	(((((((..((((.....))))((((((.......))))))...(((((......))))))))))))....	.	.	1.05786	2.08184	0.0232227	0.475595	11.6865	10.6286	1676	1474.32	1893.27	4671.08	1766.95	2206.89
mtdbD00002058-His-GTG	His	His-GTG	CAC,CAT	mttRNAdb	chrM	.	GTGAATATAGTTTACAAAAAACATTAGACTGTGAATCTGACAACAGGAAATAAACCTCCTTATTCACCCCA	(((((((..((((.....)))).(((((.......)))))....((((........)))))))))))....	.	.	0.350426	1.27494	0.235843	0.995715	15.6139	15.2634	37256.3	46385.8	41895.8	54071.9	45400.9	37691
mtdbD00002059-Ser-GCT	Ser	Ser-GCT	AGC,AGT	mttRNAdb	chrM	.	AAGAAAGATTGCAAGAACTGCTAATTCATGCTTCCATGTTTAAAAACATGGCTTTCTTACCA	(((((((....((.(((.......))).))...(((((........))))))))))))....	.	.	-0.10644	0.928877	0.831731	0.995715	13.3397	13.4461	19941.2	8580.5	7134.78	12750.6	9160.58	5852.61
mtdbD00002060-Leu-TAG	Leu	Leu-TAG	CTA,CTG	mttRNAdb	chrM	.	ACTTTTATAGGATAATAGTAATCCATTGGTCTTAGGAACCAAAAACCTTGGTGCAAATCCAAATAAAAGTACCA	(((((((..((((.......)))).(((((.......))))).....((((.......)))).)))))))....	.	.	-0.0974095	0.93471	0.674664	0.995715	12.0205	12.1179	4064.87	5057.7	5053.52	2757.03	5023.07	4185.74
mtdbD00002061-Glu-TTC	Glu	Glu-TTC	GAA,GAG	mttRNAdb	chrM	.	GTTTCTGTAGTTGAATTACAACGATGATTTTTCATGTCATTGGTCGCAGTTGAATGCTGTGTAGAAATACCA	(((((((..((((.....))))((((((.......))))))...(((((.......))))))))))))....	.	.	0.699713	1.62418	0.00664181	0.305523	16.097	15.3973	41787.4	44052.7	51712.8	63938.6	75526.8	56187
mtdbD00002062-Thr-TGT	Thr	Thr-TGT	ACA,ACG	mttRNAdb	chrM	.	GTCTTGATAGTATAAACATTACTCTGGTCTTGTAAACCTGAAATGAAGATCTTCTCTTCTCAAGACACCA	(((((((..(((.......)))((.(((.......))).))...(((((.....))))))))))))....	.	.	0.0301925	1.02115	0.896076	0.995715	13.5593	13.5291	11231.5	12653.4	13804.2	8153.96	14373.7	12198.4
mtdbD00002063-Pro-TGG	Pro	Pro-TGG	CCA,CCG	mttRNAdb	chrM	.	CAAGAAGTAGTTTAATTAGAATACCAGCTTTGGGTGCTGGTGGTGGGGAGTAGCTCCTTCTTCTTGACCA	(((((((..((((.....))))((((((.......))))))...(((((.....))))))))))))....	.	.	-0.0230771	0.984131	0.924409	0.995715	13.583	13.6061	11682.2	13509.3	14566	8508.96	15362.7	11313
tRNA-Ala-AGC-1-1	Ala	Ala-AGC	GCA,GCC,GCT	GtRNAdb	chr13:21242569-21242641	+	GGGGGTGTAGCTCAGTGGTAGAGCGCGTGCTTAGCATGCACGAGGCCCTGGGTTCGATCCCCAGCACCTCCACCA	)))))))..)))).......((((.))))).......(((((.....))))).......((((((((((((....	85.3	24.1	0.0586411	1.04148	0.874739	0.995715	6.47947	6.42083	124.544	73.091	76.6995	109.793	63.7022	69.8243
tRNA-Ala-AGC-2-1	Ala	Ala-AGC	GCA,GCC,GCT	GtRNAdb	chr13:21222585-21222657	+	GGGGGTGTAGCTCAGTGGTAGAGCGCGTGCTTAGCATGCACGAGGCCCCGGGTTCAATCCCCGGCACCTCCACCA	)))))))..)))).......((((.))))).......(((((.....))))).......((((((((((((....	84.7	23.6	-0.34837	0.785471	0.424447	0.995715	9.92002	10.2684	2012.86	993.46	933.081	1195.52	735.186	670.759
tRNA-Ala-AGC-3-1	Ala	Ala-AGC	GCA,GCC,GCT	GtRNAdb	chr13:21259767-21259839	+	GGGGATGTAGCTCAGTGGTAGAGCGCATGCTTAGCATGCATGAGGTCCTGGGTTCGATCCCCAGCATCTCCACCA	)))))))..)))).......((((.))))).......(((((.....))))).......((((((((((((....	83.6	25.2	0.119681	1.08649	0.722619	0.995715	9.81372	9.69404	1099.54	805.924	739.891	1011.32	566.01	883.203
tRNA-Ala-AGC-4-1	Ala	Ala-AGC	GCA,GCC,GCT	GtRNAdb	chr3:19628994-19629067	+	GGGGGATTAGCTCAAATGGTAGAGCGCTCGCTTAGCATGCGAGAGGTAGCGGGATCGATGCCCGCATCCTCCACCA	)))))))..))))........((((.))))).......(((((.....))))).......((((((((((((....	59.7	23.6	-0.233447	0.8506	0.338435	0.995715	9.18137	9.41482	800.638	698.211	679.915	534.326	620.313	468.714
tRNA-Ala-AGC-5-1	Ala	Ala-AGC	GCA,GCC,GCT	GtRNAdb	chr13:23285648-23285721	+	GGGGGATTAGCTCAAATGGTAGAGCGCTCGCTTAGCATGCGAGAGGTAGTGGGATCGATGCCCACATCCTCCACCA	)))))))..))))........((((.))))).......(((((.....))))).......((((((((((((....	59.3	24.1	-0.191636	0.875612	0.558951	0.995715	7.09416	7.2858	227.737	121.177	149.939	139.071	116.961	124.049
tRNA-Ala-AGC-6-1_G35C	Ala	Ala-AGC	GCA,GCC,GCT	GtRNAdb	chr6:28779848-28779920	-	GGGGGTATAGCTCAGCGGTAGAGCGCGTGCTTACCATGCACGAGGTCCTGGGTTCAATCCCCAATACCTCCACCA	)))))))..)))).......((((.))))).......(((((......)))).......((((.(((((((....	74.1	21.8	7.62294	197.122	3.87737e-82	7.13435e-80	10.0675	2.44455	11.8613	1.92345	4.6135	896.643	1157.08	974.568
tRNA-Ala-AGC-6-1_Human	Ala	Ala-AGC	GCA,GCC,GCT	GtRNAdb	chr6:28779848-28779920	-	GGGGGTATAGCTCAGCGGTAGAGCGCGTGCTTAGCATGCACGAGGTCCTGGGTTCAATCCCCAATACCTCCACCA	)))))))..)))).......((((.))))).......(((((......)))).......((((.(((((((....	74.1	21.8	-8.23413	0.00332109	1.08974e-73	1.00256e-71	2.32855	10.5627	1291.7	1709.94	1818.87	9.75938	4.17719	1.48562
tRNA-Ala-AGC-7-1	Ala	Ala-AGC	GCA,GCC,GCT	GtRNAdb	chr19:3576262-3576335	+	GGGGAATTAGCTCAAATGGTAGAGCGCTCGCTTAGCATGTGAGAGGTAGCGGGATCGATGCCCGCATTCTCCACCA	)))))))..))))........((((.))))).......(((((.....))))).......((((((((((((....	54.6	23.8	-0.110998	0.925947	0.795424	0.995715	5.30079	5.41178	41.5145	40.3924	51.9019	36.5977	43.8605	31.9409
tRNA-Ala-CGC-1-1	Ala	Ala-CGC	GCG	GtRNAdb	chr13:21254219-21254291	+	GGGGATGTAGCTCAGTGGTAGAGCGCATGCTTCGCATGTATGAGGCCCCGGGTTCGATCCCCGGCATCTCCACCA	)))))))..)))).......((((.))))).......(((((.....))))).......((((((((((((....	79.7	24.4	-0.349864	0.784658	0.181081	0.995715	7.02603	7.37589	149.452	189.46	189.154	70.7555	146.202	160.447
tRNA-Ala-CGC-2-1	Ala	Ala-CGC	GCG	GtRNAdb	chr2:57182077-57182149	+	GGGGATGTAGCTCAGTGGTAGAGCGCGCGCTTCGCATGTGTGAGGTCCCGGGTTCAATCCCCGGCATCTCCACCA	)))))))..)))).......((((.))))).......(((((.....))))).......((((((((((((....	74.4	20	-0.137225	0.909266	0.534907	0.995715	9.25314	9.39037	770.984	693.403	677.608	539.206	520.06	658.874
tRNA-Ala-CGC-3-1	Ala	Ala-CGC	GCG	GtRNAdb	chrX:136379365-136379437	-	GGGGATGTAGCTCAGAGGTAGAGCACATGCTTCGCATGTGTGTGGTCCCGGGTTCGACTCCCGGCATCTCCACCA	)))))))..)))).......((((.))))).......(((((.....))))).......((((((((((((....	64.5	19.6	-0.0481065	0.967205	0.895565	0.995715	5.32379	5.37189	34.3978	50.9713	45.5583	18.2988	56.3921	40.8546
tRNA-Ala-CGC-5-1	Ala	Ala-CGC	GCG	GtRNAdb	chr4:132125258-132125330	+	TCCCTGGTAGTCTAGTGGTTAGGATTCGGTGCTCGCACCGCCGTGGCCCAGGTTTGAATCCTAGTCAGGGAACCA	)))))))..))))........((((.))))).......(((((....).))).......(((.((((((((....	58.7	18.6	-0.0165471	0.988596	0.95493	0.995715	7.80685	7.8234	231.295	228.89	260.086	169.569	239.144	229.529
tRNA-Ala-TGC-1-1	Ala	Ala-TGC	GCA,GCG	GtRNAdb	chr13:21240944-21241016	+	GGGGGTGTAGCTCAGTGGTAGAGCGCATGCTTTGCATGCATGAGGCCCCGGGTTCGATCCCCGGCACCTCCACCA	)))))))..)))).......((((.))))).......(((((.....))))).......((((((((((((....	84.9	24.3	-0.174845	0.885862	0.661905	0.995715	8.19882	8.37367	481.569	278.9	298.724	359.877	219.303	213.93
tRNA-Ala-TGC-2-1	Ala	Ala-TGC	GCA,GCG	GtRNAdb	chr5:125404249-125404321	-	GGGGATGTAGCTCAGTGGTAGAGCGCATGCTTTGCATGTATGAGGCCCCGGGTTCGATCCCCGGCATCTCCACCA	)))))))..)))).......((((.))))).......(((((.....))))).......((((((((((((....	79.7	24.4	-0.276617	0.825524	0.370266	0.995715	6.61539	6.892	96.0765	120.215	159.166	50.0168	118.006	116.621
tRNA-Ala-TGC-4-1	Ala	Ala-TGC	GCA,GCG	GtRNAdb	chr5:125409471-125409543	+	GGGGATGTAGCTCAGTGGTAGAGCGCATGCTTTGCATGTATGAGGCCCCGGGTTCAATCCCCGGCATCTCCACCA	)))))))..)))).......((((.))))).......(((((.....))))).......((((((((((((....	78.7	24.4	0.048025	1.03385	0.839563	0.995715	9.02782	8.9798	574.087	494.326	541.51	505.048	431.295	519.225
tRNA-Ala-TGC-5-1	Ala	Ala-TGC	GCA,GCG	GtRNAdb	chrX:136380746-136380818	+	GGGGATGTAGCTCAGCGGTAGAGCACATGCTTTGCATGTATGGGGTCCCGGGTTCGATTCCCGGCATCTCCACCA	)))))))..)))).......((((.))))).......(((((.....))))).......((((((((((((....	73.8	24.4	0.0236783	1.01655	0.909885	0.995715	8.75099	8.72731	397.354	504.905	449.24	365.977	428.162	422.66
tRNA-Ala-TGC-6-1	Ala	Ala-TGC	GCA,GCG	GtRNAdb	chrX:136590364-136590436	+	GGGGATGTAGCTCAATGGTAGAGCACATGCTTTGCATGTATGAGGCACCGGGTTCGATTCCCGGCATCTCCACCA	)))))))..)))).......((((.))))).......(((((.....))))).......((((((((((((....	69.9	24.3	0.0189153	1.0132	0.93512	0.995715	8.3039	8.28498	291.788	383.728	319.485	234.225	327.91	340.208
tRNA-Ala-TGC-7-1	Ala	Ala-TGC	GCA,GCG	GtRNAdb	chrX:136430364-136430436	-	GGGGATGTAGCTCAGTGGTAGAGCACATGCTTTGCATGTATGGGGTCCTGGGTTCGATTCCCGGCATCTCCACCA	)))))))..)))).......((((.))))).......(((((.....))))).......((((((((((((....	72.9	21.3	0.273086	1.20839	0.427223	0.995715	5.20527	4.93218	18.9781	39.4307	36.908	37.8176	27.1518	38.6262
tRNA-Arg-ACG-1-1	Arg	Arg-ACG	CGA,CGC,CGT	GtRNAdb	chr13:23446791-23446864	-	GGGCCAGTGGCGCAATGGATAACGCGTCTGACTACGGATCAGAAGATTCCAGGTTCGACTCCTGGCTGGCTCGCCA	)))))))..)))..........(((.))))).......(((((.....))))).......((((((((((((....	67.6	21.7	-0.0866949	0.941678	0.713182	0.995715	14.2965	14.3832	25518.4	21839.8	20841.5	13764.4	18495.6	25811.2
tRNA-Arg-ACG-2-1	Arg	Arg-ACG	CGA,CGC,CGT	GtRNAdb	chr3:19627958-19628031	-	GGGCCAGTGGCGCAATGGATAACGCGTCTGACTACGGATCAGAAGATTGTAGGTTCGACTCCTACCTGGCTCGCCA	)))))))..)))..........(((.))))).......(((((.....))))).......((((((((((((....	67.5	21.8	-0.0585802	0.960209	0.790718	0.995715	14.0413	14.0999	19106.2	19025.8	17905.6	11095.2	17421	20219.3
tRNA-Arg-ACG-3-1	Arg	Arg-ACG	CGA,CGC,CGT	GtRNAdb	chr9:123529424-123529497	-	GGGCCAGTGGCGCAATGGATAACGCGTCTGACTACGGATCAGAAGATTCTAGGTTCGACTCCTGGCTGGCTCGCCA	)))))))..)))..........(((.))))).......(((((.....))))).......((((((((((((....	64.2	18.6	0.00741127	1.00515	0.972907	0.995715	14.645	14.6375	28736.4	25948.3	26626.3	19382.1	23639.8	30197.5
tRNA-Arg-CCG-1-1	Arg	Arg-CCG	CGG	GtRNAdb	chr13:21215457-21215530	-	GGCCGCGTGGCCTAATGGATAAGGCGTCTGATTCCGGATCAGAAGATTGAGGGTTCGAGTCCCTTCGTGGTCGCCA	)))))))..))))........((((.))))).......(((((.....))))).......((((((((((((....	67	17.6	0.124943	1.09046	0.572966	0.995715	10.8777	10.7527	1895.44	1794.58	1814.26	1155.27	2069.8	2235.12
tRNA-Arg-CCG-2-1	Arg	Arg-CCG	CGG	GtRNAdb	chr17:23550262-23550335	-	GGCCGCGTGGCCTAATGGATAAGGCGTCTGATTCCGGATCAGAAGATTGGGGGTTCGAGTCCCTTCGTGGTCGCCA	)))))))..))))........((((.))))).......(((((.....))))).......((((((((((((....	64.1	13.9	0.0993998	1.07133	0.644577	0.995715	12.1139	12.0145	4778.92	4120.98	4298.06	3136.42	4251.34	5352.7
tRNA-Arg-CCG-3-1	Arg	Arg-CCG	CGG	GtRNAdb	chr11:107012865-107012938	+	GACCCAGTGGCCTAATGGATAAGGCATCAGCCTCCGGAGCTGGGGATTGTGGGTTCGAGTCCCATCTGGGTCGCCA	)))))))..))))........((((.))))).......(((((.....))))).......((((((((((((....	64.9	17.7	0.0158385	1.01104	0.943029	0.995715	14.4512	14.4353	23799.7	24226.8	22679.4	14690.3	25414	24560.3
tRNA-Arg-CCT-1-1	Arg	Arg-CCT	AGG	GtRNAdb	chr11:115412980-115413053	+	GCCCCAGTGGCCTAATGGATAAGGCACTGGCCTCCTAAGCCAGGGATTGTGGGTTCGAGTCCCACCTGGGGTACCA	)))))))..))))........((((.))))).......(((((.....))))).......((((((((((((....	72.3	18.3	0.0186508	1.01301	0.953875	0.995715	10.058	10.0393	1462.5	915.561	980.37	1182.11	933.602	793.322
tRNA-Arg-CCT-2-1	Arg	Arg-CCT	AGG	GtRNAdb	chr11:115413303-115413376	-	GCCCCAGTGGCCTAATGGATAAGGCACTGGCCTCCTAAGCCAGGGATTGTGGGTTCGAGTCCCACCTGGGGTGCCA	)))))))..))))........((((.))))).......(((((.....))))).......((((((((((((....	71.1	18.3	0.0315697	1.02212	0.939204	0.995715	10.8196	10.788	2686.58	1375.26	1579.55	2242.22	1169.61	1443.28
tRNA-Arg-CCT-3-1	Arg	Arg-CCT	AGG	GtRNAdb	chr17:23548767-23548840	-	GCCCCGGTGGCCTAATGGATAAGGCATTGGCCTCCTAAGCCAGGGATTGTGGGTTCGAGTCCCACCCGGGGTACCA	)))))))..))))........((((.))))).......(((((.....))))).......((((((((((((....	71.7	15.4	0.0154335	1.01076	0.945708	0.995715	8.6786	8.66317	463.777	423.158	407.142	384.276	429.207	331.294
tRNA-Arg-CCT-4-1	Arg	Arg-CCT	AGG	GtRNAdb	chr6:38533930-38534003	+	GCCCCAGTGGCCTAATGGATAAGGCATTGGCCTCCTAAGCCAGGGATTGTGGGTTCGAGTCCCATCTGGGGTGCCA	)))))))..))))........((((.))))).......(((((.....))))).......((((((((((((....	65.6	14.1	0.275641	1.21053	0.321889	0.995715	12.2327	11.9571	5165.6	3684.36	3836.13	4863.83	3674.88	4785.19
tRNA-Arg-TCG-1-1	Arg	Arg-TCG	CGA,CGG	GtRNAdb	chr7:79466418-79466491	+	GGCCGCGTGGCCTAATGGATAAGGCGTCTGACTTCGGATCAGAAGATTGCAGGTTCGAGTCCTGCCGCGGTCGCCA	)))))))..))))........((((.))))).......(((((.....))))).......((((((((((((....	74.8	19.7	-0.0996715	0.933245	0.660395	0.995715	12.3397	12.4394	6833.29	5300.06	5586.38	3528.02	5146.3	6271.56
tRNA-Arg-TCG-2-1	Arg	Arg-TCG	CGA,CGG	GtRNAdb	chr11:115413778-115413851	+	GACCGCGTGGCCTAATGGATAAGGCGTCTGACTTCGGATCAGAAGATTGAGGGTTCGAGTCCCTTCGTGGTCGCCA	)))))))..))))........((((.))))).......(((((.....))))).......((((((((((((....	68.8	19.9	-0.161275	0.894234	0.551889	0.995715	11.1663	11.3275	3582.11	2472.59	2154.51	1661.53	1940.31	3001.7
tRNA-Arg-TCG-3-1	Arg	Arg-TCG	CGA,CGG	GtRNAdb	chr13:21279695-21279768	+	GACCACGTGGCCTAATGGATAAGGCGTCTGACTTCGGATCAGAAGATTGAGGGTTCGAATCCCTTCGTGGTTGCCA	)))))))..))))........((((.))))).......(((((.....))))).......((((((((((((....	65.5	20.7	0.0631693	1.04476	0.809494	0.995715	11.1336	11.0704	2868.06	1984.04	2011.49	1854.28	1747.11	2774.4
tRNA-Arg-TCG-4-1	Arg	Arg-TCG	CGA,CGG	GtRNAdb	chr13:23526455-23526528	-	GACCACGTGGCCTAACGGATAAGGCGTCTGACTTCGGATCAGAAGATTGAGGGTTCGAATCCCTTCGTGGTTACCA	)))))))..))))........((((.))))).......(((((.....))))).......((((((((((((....	64.3	20.8	0.0480948	1.0339	0.821059	0.995715	9.89146	9.84337	1081.75	946.336	904.823	720.974	873.033	1117.93
tRNA-Arg-TCT-1-1	Arg	Arg-TCT	AGA,AGG	GtRNAdb	chr3:122292947-122293032	-	GGCTCCGTGGCGCAATGGATAGCGCATTGGACTTCTAATTCAAAGGTTCCGGGTTCGAGTCCCGGCGGAGTCGCCA	)))))))..))))........((((.))))).......(((((.....))))).......((((((((((((....	71.1	19.9	-0.12024	0.920035	0.545658	0.995715	11.2132	11.3335	2864.5	2641.85	2725.43	1742.05	2425.9	2625.84
tRNA-Arg-TCT-2-1	Arg	Arg-TCT	AGA,AGG	GtRNAdb	chr11:69123481-69123568	-	GGCTCTGTGGCGCAATGGATAGCGCATTGGACTTCTAATTCAAAGGTTGTGGGTTCGAATCCCACCAGAGTCGCCA	)))))))..))))........((((.))))).......(((((.....))))).......((((((((((((....	70.8	20.2	0.106912	1.07692	0.609339	0.995715	10.0619	9.95495	1136.31	1011.73	1019.01	783.19	986.862	1291.75
tRNA-Arg-TCT-3-1	Arg	Arg-TCT	AGA,AGG	GtRNAdb	chr19:12011587-12011673	-	GGCTCTGTGGCGCAATGGATAGCGCATTGGACTTCTAATTCAAAGGTTGTGGGTTCGAGTCCCACCAGAGTCGCCA	)))))))..))))........((((.))))).......(((((.....))))).......((((((((((((....	70.3	20.3	-0.00268452	0.998141	0.990303	0.995715	10.461	10.4637	1621.44	1370.46	1511.5	1099.15	1300.15	1615.61
tRNA-Arg-TCT-4-1	Arg	Arg-TCT	AGA,AGG	GtRNAdb	chr1:173390328-173390402	+	GTCTCTGTGGCGCAATGGACGAGCGCGCTGGACTTCTAATCCAGAGGTTCTGGGTTCGAGTCCCGGCAGAGATGCCA	)))))))..)))).........((((.))))).......(((((.....))))).......((((((((((((....	75.1	18.5	-0.137482	0.909104	0.567331	0.995715	13.248	13.3855	11605.1	11464.7	11078.2	5769.01	10131.8	12457.7
tRNA-Arg-TCT-5-1	Arg	Arg-TCT	AGA,AGG	GtRNAdb	chr13:21917161-21917247	-	GGCTCTGTGGCGCAATGGATAGCGCATTGGACTTCTAATTCAAAGGTTGCGGGTTCGAGTCCCGCCAGAGTCGCCA	)))))))..))))........((((.))))).......(((((.....))))).......((((((((((((....	70.7	19.8	0.0256407	1.01793	0.902964	0.995715	10.3923	10.3667	1525.36	1326.22	1360.98	1030.83	1231.23	1572.53
tRNA-Asn-GTT-1-1	Asn	Asn-GTT	AAC,AAT	GtRNAdb	chr3:96334614-96334688	-	GTCTCCGTGGCGCAATCGGTCAGCGCGTTCGGCTGTTAACCGAAAGGTTGGTGGTTCGAGCCCACCCGGGGACGCCA	)))))))..)))).........((((.))))).......(((((.....))))).......((((((((((((....	81.6	25.4	0.0109438	1.00761	0.965612	0.995715	9.47699	9.46604	894.342	727.063	638.97	585.563	635.978	798.522
tRNA-Asn-GTT-2-1	Asn	Asn-GTT	AAC,AAT	GtRNAdb	chr3:96322073-96322147	+	GTCTCTGTGGCGCAATTGGTTAGCGCGTTCGGCTGTTAACCGAAAGGTTGGTGGTTCAAGCCCACCCAGGGACGCCA	)))))))..)))).........((((.))))).......(((((.....))))).......((((((((((((....	80.8	25.8	-0.0319159	0.978121	0.911252	0.995715	6.56288	6.59479	112.682	101.943	94.5768	84.1747	74.1452	108.45
tRNA-Asn-GTT-3-1	Asn	Asn-GTT	AAC,AAT	GtRNAdb	chr1:171033941-171034015	-	GTCTCTGTGGCGCAATCGGTTAGCGCGTTCGGCTGTTAACCGAAAGGTTGGTGGTTCGAGCCCACCCAGGGACGCCA	)))))))..)))).........((((.))))).......(((((.....))))).......((((((((((((....	80.9	25.7	-0.00116804	0.999191	0.996245	0.996245	13.8886	13.8898	19604.4	14749	14095.4	12006.5	12521.1	18680.2
tRNA-Asp-GTC-1-1	Asp	Asp-GTC	GAC,GAT	GtRNAdb	chr1:171037028-171037100	-	TCCTCGTTAGTATAGTGGTGAGTATCCCCGCCTGTCACGCGGGAGACCGGGGTTCGATTCCCCGACGGGGAGCCA	)))))))..))))........((((.))))).......(((((....))))).......((((((((((((....	66.5	30.8	0.52408	1.43802	0.210228	0.995715	14.1928	13.6688	17629.4	11502.2	12414.4	24414.3	11376.6	14067.4
tRNA-Asp-GTC-2-1	Asp	Asp-GTC	GAC,GAT	GtRNAdb	chr10:91182096-91182168	-	TCCTCGTTAGTATAGTGGTTAGTATCCCCGCCTGTCACGCGGGAGACCGGGGTTCAATTCCCCGACGGGGAGCCA	)))))))..))))........((((.))))).......(((((....))))).......((((((((((((....	65.4	30.7	0.201492	1.14989	0.449535	0.995715	12.4826	12.2811	5583.11	4824.97	5461.24	5899.55	4435.13	5461.89
tRNA-Asp-GTC-3-1	Asp	Asp-GTC	GAC,GAT	GtRNAdb	chr2:114103366-114103438	+	TCCTCGTTAGTATAGTGGTGAGTATCCCTGCCTGTCACGCAGGACACCAGGGTTCGATTTCCTGACGGGGAGCCA	)))))))..))))........((((.))))).......(((((....))))).......((((((((((((....	52.2	30.1	0.267982	1.20412	0.400614	0.995715	9.29417	9.02618	507.664	459.704	690.295	623.381	393.7	730.183
tRNA-Asp-GTC-4-1	Asp	Asp-GTC	GAC,GAT	GtRNAdb	chr5:100992873-100992945	-	TCCTCGTTAGTATAGTGGTGAGTATCCCCGCCTGTCACACAGGAGACCGGGGTTCGATTCCCCGATGGGGAGCCA	)))))))..))))........((((.)).).........(.((....))))).......((((((((((((....	51.4	17.5	-0.172771	0.887137	0.527324	0.995715	6.94628	7.11905	110.31	167.34	163.203	93.9341	143.069	114.393
tRNA-Cys-GCA-12-1	Cys	Cys-GCA	TGC,TGT	GtRNAdb	chr6:48253079-48253151	-	GGGGGTATAGCTCAGGGGTAGAGCATTTGACTGCAGATCAAGAGGTCCTTGGTTCAAATCCAGGTGTCCCCTCCA	)))))))..)))).......((((.))))).......(((((.....))))).......((((((((((((....	72.6	16	-0.380563	0.768138	0.276103	0.995715	5.04148	5.42205	36.77	45.201	52.4786	31.718	35.5061	26.7412
tRNA-Cys-GCA-13-1	Cys	Cys-GCA	TGC,TGT	GtRNAdb	chr6:48356850-48356922	+	GGGGGTATAGCTCAGAGGTAGAGCATTTGACTGCAGATCAAGAGATCTCTGGTTCAAATCCAGGTGCCCCCTCCA	)))))))..)))).......((((.))))).......(((((.....))))).......((((((((((((....	66.7	18.5	0.063303	1.04486	0.816483	0.995715	6.55858	6.49527	91.332	93.2872	102.074	108.573	78.3224	73.5383
tRNA-Cys-GCA-14-1	Cys	Cys-GCA	TGC,TGT	GtRNAdb	chr6:48143355-48143427	+	GGGGGTATAGCTCAGGGGTAGAGCATTTGACTGCAGATCAAGAGGTCCCTAGTTCAAATCCAGGTGCCCCCTCCA	)))))))..)))).......((((.))))).......(((((.....))).).......(.((((((((((....	69.4	15.8	-0.388008	0.764184	0.241746	0.995715	4.36988	4.75789	24.9087	34.622	26.5276	15.859	17.7531	24.5128
tRNA-Cys-GCA-18-1	Cys	Cys-GCA	TGC,TGT	GtRNAdb	chr6:48305463-48305535	-	GGGGGTATAGCTCAGAGGAAGAGCATTTGACTGCAGATCAAGAGGTCCCTGATTCAAATCCAGGTGCCCCCTCCA	)))))))..)))).......((((.))))).......(((((.....)))).........(((((((((((....	63.5	19.9	-0.236161	0.849002	0.457386	0.995715	4.85423	5.09039	34.3978	39.4307	34.6013	20.7387	29.2403	31.9409
tRNA-Cys-GCA-21-1	Cys	Cys-GCA	TGC,TGT	GtRNAdb	chr6:48302458-48302530	+	GGGGTTATAGCTCAGGTGTAGAGCATTTGACTGCAGATCAAGAGGTCCCTGGTTCAAATCCAGGTGCCCCCTCCA	)))).))..)))).......((((.))))).......(((((.....))))).......(((((((.((((....	59.6	12	-0.561498	0.677598	0.124916	0.995715	4.26514	4.82664	29.6532	37.5072	24.2209	20.7387	18.7974	15.599
tRNA-Cys-GCA-25-1	Cys	Cys-GCA	TGC,TGT	GtRNAdb	chr6:48205067-48205139	+	GGGGGTATAGCTCAGGGGTGGAGCATTTGACTGCAGATCAAGGGGTCCCTGTTTCAAATCCAGGTGCCCCCTCCA	)))))))..)))).......((((.))))).......(((((.....)))).........(((((((((((....	57.3	18.6	-0.601737	0.65896	0.0160768	0.422591	6.08423	6.68597	125.73	104.828	99.1903	40.2575	75.1895	78.738
tRNA-Cys-GCA-3-1	Cys	Cys-GCA	TGC,TGT	GtRNAdb	chr6:47978996-47979068	+	GGGGGTATAGCTCAGTGGTAGAGCATTTGACTGCAGATCAAGAGGTCCCCGGTTCAAATCCGGGTGCCCCCTCCA	)))))))..)))).......((((.))))).......(((((.....))))).......((((((((((((....	81.9	20.3	-0.160354	0.894805	0.492306	0.995715	7.15204	7.31239	154.197	174.072	177.043	121.992	144.113	136.677
tRNA-Cys-GCA-8-1	Cys	Cys-GCA	TGC,TGT	GtRNAdb	chr6:48224328-48224400	-	GGGGGCATAGCTCAGGGGTAGAGCATTTGACTGCAGATCAAGAGGTCCCCGGTTCAAATCCGGGTGCTCCCTCCA	)))))))..)))).......((((.))))).......(((((.....))))).......((((((((((((....	77.1	20.8	-0.0495499	0.966238	0.936737	0.995715	5.2173	5.26685	32.0255	40.3924	47.8651	30.4981	43.8605	31.9409
tRNA-Gln-CTG-1-1	Gln	Gln-CTG	CAG	GtRNAdb	chr13:21920199-21920271	+	GGTTCCATGGTGTAATGGTTAGCACTCTGGACTCTGAATCCAGCGACCCGAGTTCAAATCTCGGTGGGACCTCCA	)))))))..))))........((((.))))).......(((((....))))).......((((((((((((....	73.6	25.8	0.156405	1.11451	0.55752	0.995715	8.19925	8.04285	301.277	292.364	249.129	243.985	367.593	218.387
tRNA-Gln-CTG-2-1	Gln	Gln-CTG	CAG	GtRNAdb	chr9:64738045-64738117	+	GGTTCCATGGTGTAATGGTTAGCACTCTGGACTCTGAATCCAGCGATCCGAGTTCAAATCTCGGTGGAACCTCCA	)))))))..))))........((((.))))).......(((((....))))).......((((((((((((....	71.5	27.5	-0.188931	0.877255	0.427101	0.995715	15.9018	16.0907	67971.2	86505.1	68433.8	39524.3	71282.7	66099.8
tRNA-Gln-CTG-4-1	Gln	Gln-CTG	CAG	GtRNAdb	chr3:97681458-97681530	+	GGTTCCATGGTGTAATGGTGAGCACTCTGGACTCTGAATCCAGCGATCCGAGTTCAAATCTCGGTGGGACCTCCA	)))))))..))))........((((.))))).......(((((....))))).......((((((((((((....	71.1	25.7	0.351832	1.27618	0.228244	0.995715	12.2935	11.9417	4133.66	4508.56	3916.86	5472.57	4565.67	3674.69
tRNA-Gln-CTG-5-1	Gln	Gln-CTG	CAG	GtRNAdb	chr13:21996580-21996652	-	GGTTCCATGGTGTAATGGCTAGCACTCTGGACTCTGAATCCAGCGATCCGAGTTCAAATCTCGGTGGGATTTCCA	)))))))..))))........((((.))))).......(((((....))))).......((((((((((((....	60.3	24.1	0.306539	1.23674	0.275471	0.995715	12.6846	12.3781	5254.56	6116.56	5617.52	7059.69	5798.99	5175.91
tRNA-Gln-TTG-2-1	Gln	Gln-TTG	CAA,CAG	GtRNAdb	chr13:21268468-21268540	-	GGTCCCATGGTGTAATGGTTAGCACTCTGGACTTTGAATCCAGCAATCTGAGTTCAAATCTCGGTGGGACCTCCA	)))))))..))))........((((.))))).......(((((....))))).......((((((((((((....	65.7	24.2	0.221551	1.16599	0.312196	0.995715	8.01288	7.79133	225.365	208.694	269.313	203.727	270.473	259.984
tRNA-Gln-TTG-3-1	Gln	Gln-TTG	CAA,CAG	GtRNAdb	chr13:23519049-23519121	+	GGCCCCATGGTGTAATGGTTAGCACTCTGGACTTTGAATCCAGCGATCCGAGTTCAAATCTCGGTGGGACCTCCA	)).))))..))))........((((.))))).......(((((....))))).......(((((((((.((....	66.9	19.7	0.156529	1.1146	0.554115	0.995715	8.0181	7.86157	189.781	231.775	315.448	235.445	237.056	255.527
tRNA-Gln-TTG-4-1	Gln	Gln-TTG	CAA,CAG	GtRNAdb	chrX:13859165-13859237	-	GGTCTCATGGTGTAATGGTTAGCACACTGGACTTTGAGTCCAGCAATCCGAGTTCGAGTCTTGGTGAGACCACCA	)))))))..))))........((((.))))).......(((((....))))).......((((((((((((....	57.7	22.7	0.272071	1.20754	0.370472	0.995715	5.89776	5.62569	41.5145	50.0096	63.4357	63.436	46.9934	56.4537
tRNA-Glu-CTC-1-1	Glu	Glu-CTC	GAG	GtRNAdb	chr1:171064163-171064235	-	TCCCTGGTGGTCTAGTGGTTAGGATTCGGCGCTCTCACCGCCGCGGCCCGGGTTCGATTCCCGGTCAGGGAACCA	)))))))..))))........((((.))))).......(((((....))))).......((((((((((((....	73.2	24.2	0.325373	1.25299	0.16711	0.995715	16.2866	15.9612	69103.9	68318.9	66151.3	75158.2	73589.6	74085.8
tRNA-Glu-CTC-2-1	Glu	Glu-CTC	GAG	GtRNAdb	chr17:56092000-56092072	-	TCCCTGGTGGTCTAGTGGTTAGGATTTGGCGCTCTCACCGCCGCGGCCTGGGTTCGATTCCCGGTCAGGGAACCA	)))))))..))))........((((.))))).......(((((....))))).......((((((((((((....	67.9	18.7	0.130049	1.09433	0.557627	0.995715	8.35174	8.22169	338.047	302.943	311.412	298.881	304.935	313.466
tRNA-Glu-TTC-1-1	Glu	Glu-TTC	GAA,GAG	GtRNAdb	chr7:58399314-58399386	+	TCCCACATGGTCTAGCGGTTAGGATTCCTGGTTTTCACCCAGGCGGCCCGGGTTCGACTCCCGGTGTGGGAACCA	)))))))..))))........((((.))))).......(((((....))))).......((((((((((((....	71.2	24.7	0.111742	1.08053	0.653561	0.995715	13.9888	13.8771	17361.4	15063.5	15572.3	14731.8	12365.5	18553.2
tRNA-Glu-TTC-2-1	Glu	Glu-TTC	GAA,GAG	GtRNAdb	chr1:34434811-34434883	-	TCCCATATGGTCTAGCGGTTAGGATTCCTGGTTTTCACCCAGGCGGCCCGGGTTCGACTCCCGGTATGGGAACCA	)))))))..))))........((((.))))).......(((((....))))).......((((((((((((....	70.4	25	0.0692767	1.04919	0.770546	0.995715	14.7439	14.6746	28482.5	26551.3	28372.5	22273.4	21941.7	33774.9
tRNA-Glu-TTC-3-1	Glu	Glu-TTC	GAA,GAG	GtRNAdb	chr3:96346674-96346746	+	TCCCTGGTGGTCTAGTGGCTAGGATTCGGCGCTTTCACCGCCGCGGCCCGGGTTCGATTCCCGGTCAGGGAACCA	)))))))..))))........((((.))))).......(((((....))))).......((((((((((((....	68.7	24.2	0.356194	1.28004	0.194404	0.995715	8.33368	7.97749	292.974	221.196	288.344	325.719	247.499	323.123
tRNA-Gly-ACC-1-1	Gly	Gly-ACC	GGA,GGC,GGT	GtRNAdb	chr11:48823727-48823801	+	GTTTCCGTAGTGTAGTGGTTAGCGCGTTCGCCTACCAAAGCGAAAGGTCCCCGGTTCGAAACCGGGCGGAAACACCA	)))))))..))))........((((.)))))........(((((.....))))).......((((((((((((....	70.7	21.2	0.27538	1.21031	0.259043	0.995715	8.83296	8.55759	436.496	372.187	393.301	434.293	457.403	380.319
tRNA-Gly-CCC-1-1	Gly	Gly-CCC	GGG	GtRNAdb	chr6:86403892-86403963	+	GCGCCGCTGGTGTAGTGGTATCATGCAAGATTCCCATTCTTGCGACCCGGGTTCGATTCCCGGGCGGCGCACCA	)))))))..))).........(((.))))).......(((((....))))).......((((((((((((....	75.1	29.1	-0.0101555	0.992985	0.973148	0.995715	11.642	11.6522	4058.94	2861.13	3343.06	3194.98	3322.96	2304.94
tRNA-Gly-CCC-2-1	Gly	Gly-CCC	GGG	GtRNAdb	chr3:96351166-96351237	-	GCATTGGTAGTTCAATGGTAGAATTCTCGCCTCCCACGCGGGTGACCCGGGTTCGATTCCCGGCCAATGCACCA	)))))))..)))).......((((.))))).......(((((....))))).......((((((((((((....	75.6	21.8	0.229608	1.17252	0.371028	0.995715	5.66875	5.43914	42.7007	48.0862	46.7117	46.3571	49.082	49.0255
tRNA-Gly-CCC-3-1	Gly	Gly-CCC	GGG	GtRNAdb	chr3:96424032-96424103	-	GCATTGGTGGTTCAATGGTAGAATTCTCGCCTCCCACGCGGGTGACCCGGGTTCGATTCCCGGCCAATGCACCA	)))))))..)))).......((((.))))).......(((((....))))).......((((((((((((....	75.9	21.8	-0.211231	0.8638	0.452887	0.995715	13.1972	13.4084	9938.58	13125.6	11640.4	4810.16	11330.6	11457.1
tRNA-Gly-CCC-4-1	Gly	Gly-CCC	GGG	GtRNAdb	chr4:32230249-32230320	+	GCATTGGTGGTTCAATGGTAGAATTCTCGCCTCCCACTCGGGTGACCCGGGTTCGATTCCCGGCCAATGCACCA	)))))))..)))).......((((.)))).........((((....))))).......((((((((((((....	68.3	12.9	-0.167958	0.890102	0.546992	0.995715	6.79183	6.95978	111.496	157.723	127.448	68.3157	148.29	102.508
tRNA-Gly-GCC-1-1	Gly	Gly-GCC	GGC,GGT	GtRNAdb	chr1:171066630-171066701	+	GCATGGGTGGTTCAGTGGTAGAATTCTCGCCTGCCACGCGGGAGGCCCGGGTTCGATTCCCGGCCCATGCACCA	)))))))..)))).......((((.))))).......(((((....))))).......((((((((((((....	80.9	20.8	0.265409	1.20198	0.542865	0.995715	13.7163	13.4509	14004.6	10058.7	11642.8	18333	7916.82	9294.05
tRNA-Gly-GCC-2-1	Gly	Gly-GCC	GGC,GGT	GtRNAdb	chr1:171044984-171045055	+	GCATTGGTGGTTCAGTGGTAGAATTCTCGCCTGCCACGCGGGAGGCCCGGGTTCGATTCCCGGCCAATGCACCA	)))))))..)))).......((((.))))).......(((((....))))).......((((((((((((....	81	21.1	0.787587	1.72619	0.155632	0.995715	10.3341	9.54655	929.926	696.288	758.921	2021.41	690.281	602.42
tRNA-Gly-GCC-3-1	Gly	Gly-GCC	GGC,GGT	GtRNAdb	chr1:74816746-74816817	-	GCATTGGTGGTTCAGTGGTAGAATTCTCGCCTGCCACGCGGGAGGCCCGGGTTTGATTCCCGGCCAATGCACCA	)))))))..)))).......((((.))))).......(((((....))))).......((((((((((((....	75.4	21.1	-0.167929	0.890119	0.757154	0.995715	4.7385	4.90643	28.4671	25.9665	39.2148	31.718	22.9746	20.7987
tRNA-Gly-GCC-4-1	Gly	Gly-GCC	GGC,GGT	GtRNAdb	chr8:111062560-111062631	+	GCATTGGTGGTTCAGTGGTAGAATTCTCGCCTGCCACGCGGGAGGCCCGGGTTCGGTTCCCGGCCAATGCACCA	)))))))..)))).......((((.))))).......(((((....))))).......((((((((((((....	72.7	21.1	0.00365812	1.00254	0.982241	0.995715	5.61525	5.61159	75.9123	40.3924	40.9448	59.7762	41.7719	33.4265
tRNA-Gly-TCC-1-1	Gly	Gly-TCC	GGA,GGG	GtRNAdb	chr1:171037996-171038068	-	GCGTTGGTGGTATAGTGGTGAGCATAGCTGCCTTCCAAGCAGTTGACCCGGGTTCGATTCCCGGCCAACGCACCA	)))))))..)).)........(.((.))))).......(((((....))))).......((((((((((((....	73.8	24.5	0.0750547	1.0534	0.715769	0.995715	11.9126	11.8375	3496.71	4120.98	4055.85	3091.28	3835.71	4011.92
tRNA-His-GTG-1-1	His	His-GTG	CAC,CAT	GtRNAdb	chr3:96463971-96464043	-	GCCGAGATCGTATAGTGGTTAGTACTCTGCATTGTGGCTGCAGCAACCTCGGTTCGAATCCGAGTCTCGGCACCA	)))))))..))))........((((.))))).......(((((....))))).......((((((((((((....	60.3	29.4	0.584221	1.49923	0.147453	0.995715	13.789	13.2048	10127.2	10177	9822.73	18728.3	8897.42	9941.79
tRNA-His-GTG-2-1	His	His-GTG	CAC,CAT	GtRNAdb	chr2:122375493-122375565	-	GCCGTGATCGTATAGTGGTTAGTACTCTGCGTTGTGGCCGCAGCAACCTCGGTTCGAATCCGAGTCACGGCACCA	)))))))..))))........((((.))))).......(((((....))))).......((((((((((((....	60.1	30.3	0.526869	1.4408	0.204296	0.995715	16.1726	15.6457	56477.6	55734.8	51416.9	99024.8	45675.5	50854.3
tRNA-His-GTG-3-1	His	His-GTG	CAC,CAT	GtRNAdb	chr3:96435971-96436043	+	GCCGTGATCGTATAGGGGTTAGTACTCTGCGTTGTGGCCGCAGCAACCTCGGTTCGAATCCGAGTCACGGCACCA	)))))))..))))........((((.))))).......(((((....))))).......((((((((((((....	55.5	30.3	-0.193011	0.874778	0.398186	0.995715	7.53132	7.72434	227.737	251.972	196.651	115.893	208.86	207.987
tRNA-Ile-AAT-1-1	Ile	Ile-AAT	ATA,ATC,ATT	GtRNAdb	chr11:69037002-69037076	+	GGCCGGTTAGCTCAGTTGGTTAGAGCGTGGTGCTAATAACGCCAAGGTCGCGGGTTCGATCCCCGTACGGGCCACCA	)))).))..)))).........((((.))))).......(((((.....))))).......(((((((.((((....	81.2	16.4	0.445926	1.36219	0.050768	0.778442	7.50398	7.05805	130.474	136.565	155.706	140.291	160.822	215.415
tRNA-Ile-TAT-1-1	Ile	Ile-TAT	ATA	GtRNAdb	chr7:28372998-28373093	+	GCTCCAGTGGCGCAATCGGTTAGCGCGCGGTACTTATAATGCCGAGGTTGTGAGTTCGATCCTCACCTGGAGCACCA	)))))))..)))).........((((.))))).......(((((.....))))).......((((((((((((....	73.7	28.2	0.0831317	1.05932	0.676918	0.995715	11.1319	11.0488	2146.9	2350.45	2261.19	1661.53	2440.52	2307.91
tRNA-Ile-TAT-2-1	Ile	Ile-TAT	ATA	GtRNAdb	chr13:21896937-21897031	-	GCTCCAGTGGCGCAATCGGTTAGCGCGCGGTACTTATAATGCCGAGGTTGTGAGTTCGAGCCTCACCTGGAGCACCA	)))))))..)))).........((((.))))).......(((((.....))))).......((((((((((((....	73.1	28.1	0.0162604	1.01133	0.943409	0.995715	10.5948	10.5786	1635.67	1667.63	1576.66	984.478	1876.6	1606.7
tRNA-iMet-CAT-1-1	iMet	iMet-CAT	ATG	GtRNAdb	chr3:90475859-90475931	-	AGCAGAGTGGCGCAGCGGAAGCGTGCTGGGCCCATAACCCAGAGGTCGATGGATCGAAACCATCCTCTGCTACCA	)))))))..)))).......((((.))))).......(((((.....))))).......((((((((((((....	60.4	29.6	-0.0233988	0.983912	0.98878	0.995715	6.70091	6.72431	92.5181	107.713	134.368	112.233	84.5881	92.1086
tRNA-iMet-CAT-2-1	iMet	iMet-CAT	ATG	GtRNAdb	chr15:69396622-69396694	-	AGCAGAGTGGCGCAGCGGAAGCATGCTGGGCCCATAACCCAGAGGTCGATGGATCGAAACCATCCTCTGCTACCA	)))))))..).)).......((.(.))))).......(((((.....))))).......((((((((((((....	53.1	23.9	-0.425558	0.744551	0.179082	0.995715	4.35712	4.78268	32.0255	32.6986	24.2209	13.4192	24.0189	20.7987
tRNA-iMet-CAT-3-1	iMet	iMet-CAT	ATG	GtRNAdb	chr13:21907110-21907182	+	AGCAGAGTGGCGCAGCGGAAGCGTGCTGGGCCCATAACCCAGAGGTCGATAGATCGAAACCATCCTCTGCTACCA	)))))))..)))).......((((.))))).......(((((.....))).).......(.((((((((((....	52.6	25	0.897066	1.86227	0.078892	0.995715	7.5755	6.67844	142.336	102.904	82.4664	278.142	112.784	109.193
tRNA-Leu-AAG-1-1	Leu	Leu-AAG	CTA,CTC,CTT	GtRNAdb	chr11:48856973-48857055	-	GGTAGCGTGGCCGAGCGGTCTAAGGCGCTGGATTAAGGCTCCAGTCTCTTCGGGGGCGTGGGTTCGAATCCCACCGCTGCCACCA	)))))))..)))...........(((.))))).......(((((.)))...(((...))))).......((((((((((((....	74.8	19.7	-0.0128783	0.991113	0.950883	0.995715	7.04088	7.05376	141.149	136.565	145.325	82.9548	106.518	189.417
tRNA-Leu-AAG-3-1	Leu	Leu-AAG	CTA,CTC,CTT	GtRNAdb	chr13:21170205-21170287	+	GGTAGTGTGGCCGAGCGGTCTAAGGCGCTGGATTAAGGCTCCAGTCTCTTCGGGGGCGTGGGTTCGAATCCCACCACTGCCACCA	)))))))..)))...........(((.))))).......(((((.)))...(((...))))).......((((((((((((....	74.1	20.1	-0.0681444	0.953864	0.75323	0.995715	10.9922	11.0604	2081.66	2410.08	2320.59	1552.96	2375.78	1866.68
tRNA-Leu-CAA-1-1	Leu	Leu-CAA	TTG	GtRNAdb	chr13:21172836-21172942	-	GTCAGGATGGCCGAGTGGTCTAAGGCGCCAGACTCAAGTTCTGGTCTCCCCTGGAGGCGTGGGTTCGAATCCCACTTCTGACACCA	)))))))..)))...........(((.))))).......(((((.))))...((((..))))).......((((((((((((....	77.7	23.3	-0.14047	0.907223	0.579773	0.995715	6.5717	6.71217	109.124	103.866	119.951	62.2161	120.094	90.623
tRNA-Leu-CAA-2-1	Leu	Leu-CAA	TTG	GtRNAdb	chr13:21200203-21200308	+	GTCAGGATGGCCGAGTGGTCTAAGGCGCCAGACTCAAGTTCTGGTCTCCGTATGGAGGCGTGGGTTCGAATCCCACTTCTGACACCA	)))))))..)))...........(((.))))).......(((((.))))....((((..))))).......((((((((((((....	78.1	26.6	0.315325	1.24429	0.240352	0.995715	9.94501	9.62969	795.893	815.541	912.897	1033.27	902.274	776.981
tRNA-Leu-CAA-3-1	Leu	Leu-CAA	TTG	GtRNAdb	chr11:58302473-58302580	-	GTCAGGATGGCCGAGTGGTCTAAGGCGCCAGACTCAAGTTCTGGTCTCCGAATGGAGGCGTGGGTTCGAATCCCACTTCTGACACCA	)))))))..)))...........(((.))))).......(((((.))))....((((..))))).......((((((((((((....	75.6	23.2	0.109641	1.07896	0.597688	0.995715	11.1599	11.0502	2053.19	2289.86	2417.48	1693.25	2562.71	2276.72
tRNA-Leu-CAA-4-1	Leu	Leu-CAA	TTG	GtRNAdb	chr13:21914837-21914943	+	GTCAGGATGGCCGAGTGGTCTAAGGCGCCAGACTCAAGTTCTGGTCTCCGTGTGGAGGCGTGGGTTCGAATCCCACTTCTGACACCA	)))))))..)))...........(((.))))).......(((((.))))....((((..))))).......((((((((((((....	75.1	24.3	0.168574	1.12395	0.429482	0.995715	9.02017	8.85159	480.383	478.938	512.676	374.516	603.604	506.597
tRNA-Leu-CAG-2-1	Leu	Leu-CAG	CTG	GtRNAdb	chr1:171038613-171038696	+	GTCAGGATGGCCGAGCGGTCTAAGGCGCTGCGTTCAGGTCGCAGTCTCCCCTGGAGGCGTGGGTTCGAATCCCACTTCTGACACCA	)))))))..)))...........(((.))))).......(((((.))))...((((..))))).......((((((((((((....	77.3	29.8	-0.396359	0.759774	0.287245	0.995715	3.8667	4.26306	21.3503	20.1962	19.6074	9.75938	16.7088	14.8562
tRNA-Leu-CAG-4-1	Leu	Leu-CAG	CTG	GtRNAdb	chr3:24163024-24163107	-	GTCAGGATGGCCGAGCAGTCTAAGGCACTGCGTTCAGGTCGCAGTCTCCCCTGGAGGCGTGGATTCGAATCCCACTCCTGACACCA	)))))))..)))...........(((.))))).......(((((.))))...((((..)))).........(((((((((((....	60.3	29.9	-0.12202	0.9189	0.725886	0.995715	4.86166	4.98368	29.6532	38.4689	32.2945	20.7387	27.1518	34.1693
tRNA-Leu-TAA-1-1	Leu	Leu-TAA	TTA,TTG	GtRNAdb	chr19:12011085-12011168	-	ACCAGAATGGCCGAGTGGTTAAGGCGTTGGACTTAAGATCCAATGGATTTATATCCGCGTGGGTTCGAACCCCACTTCTGGTACCA	)))))))..)))..........(((.))))).......(((((.))))....((((..))))).......((((((((((((....	86.4	31.4	-0.0819875	0.944755	0.741759	0.995715	9.72923	9.81121	869.433	1023.27	972.873	479.43	1085.03	906.23
tRNA-Leu-TAA-2-1	Leu	Leu-TAA	TTA,TTG	GtRNAdb	chr10:12922570-12922653	-	ACCAGGATGGCCGAGTGGTTAAGGCGTTGGACTTAAGATCCAATGGACATATGTCTGCGTGGGTTCGAACCCCACTCCTGGTACCA	)))))))..)))..........(((.))))).......(((((.))))....((((..))))).......((((((((((((....	84	26.6	0.16157	1.1185	0.544949	0.995715	13.6241	13.4625	11038.1	12725.5	12251.7	7665.99	17296.7	11586.4
tRNA-Leu-TAG-1-1	Leu	Leu-TAG	CTA,CTG	GtRNAdb	chr11:69124240-69124322	+	GGTAGCGTGGCCGAGCGGTCTAAGGCGCTGGATTTAGGCTCCAGTCTCTTCGGAGGCGTGGGTTCGAATCCCACCGCTGCCACCA	)))))))..)))...........(((.))))).......(((((.)))....(((..))))).......((((((((((((....	75.2	21.7	-0.0857039	0.942325	0.705371	0.995715	10.5286	10.6143	1596.53	1666.67	1735.25	890.544	1773.22	1622.3
tRNA-Leu-TAG-2-1	Leu	Leu-TAG	CTA,CTG	GtRNAdb	chr14:51082829-51082911	-	GGTAGTGTGGCCGAGCGGTCTAAGGCGCTGGATTTAGGCTCCAGTCTCTTCGGAGGCGTGGGTTCGAATCCCACCACTGCCACCA	)))))))..)))...........(((.))))).......(((((.)))....(((..))))).......((((((((((((....	74.5	22.1	-0.0485577	0.966902	0.826417	0.995715	10.0463	10.0948	1098.36	1156.95	1230.65	646.559	1224.96	1193.7
tRNA-Leu-TAG-3-1	Leu	Leu-TAG	CTA,CTG	GtRNAdb	chr7:120835478-120835560	-	GGTAGCGTGGCCGAGTGGTCTAAGGCGCTGGATTTAGGCTCCAGTCATTTCGATGGCGTGGGTTCGAATCCCACCGCTGCCACCA	)))))))..)))...........(((.))))).......(((((..))....((...))))).......((((((((((((....	73.9	16.8	-0.110828	0.926056	0.613837	0.995715	11.8568	11.9677	3908.3	4540.3	4330.35	2422.77	4307.73	3974.04
tRNA-Lys-CTT-1-1	Lys	Lys-CTT	AAG	GtRNAdb	chrX:136195731-136195804	-	GCCCAGCTAGCTCAGTTGGTAGAGCGTGGGACTCTTAATCCTAGGGTCGTGGGTTCGAACCCCACGTTGGGCGCCA	)))))))..))))........((((.))))).......(((((.....))))).......((((((((((((....	86.4	16.2	-0.279277	0.824004	0.317034	0.995715	6.86288	7.14216	186.222	134.641	131.485	112.233	114.873	99.5367
tRNA-Lys-CTT-13-1	Lys	Lys-CTT	AAG	GtRNAdb	chr2:86140983-86141060	-	GCCTAGCTAGTTCAGTCGGTAGAGCATGAGACTCTTAATCTCAGGTTCATGAGTTTGAGCCCCATGTTGGTTTGGCACCA	)))))))..))))........((((.))))).......(((((.....))).).......(.((((((((....((....	51.2	10.2	0.0919063	1.06578	0.786251	0.995715	6.26429	6.17238	72.3539	75.9761	80.7363	39.0375	111.74	72.0527
tRNA-Lys-CTT-2-1	Lys	Lys-CTT	AAG	GtRNAdb	chr9:90126508-90126581	-	GCCCGGCTAGCTCAGTCGGTAGAGCATGGGACTCTTAATCCCAGGGTCGTGGGTTCGAGCCCCACGTTGGGCGCCA	)))))))..))))........((((.))))).......(((((.....))))).......((((((((((((....	88	18.7	0.323494	1.25136	0.476815	0.995715	14.6546	14.3311	24493.6	18819	22395.7	35862.1	17782.3	14064.4
tRNA-Lys-CTT-3-1	Lys	Lys-CTT	AAG	GtRNAdb	chr3:96428234-96428307	+	GCCCGGCTAGCTCAGTCGGTAGAGCATGAGACTCTTAATCTCAGGGTCGTGGGTTCGAGCCCCACGTTGGGCGCCA	)))))))..))))........((((.))))).......(((((.....))))).......((((((((((((....	87.8	19	0.636853	1.55493	0.0363054	0.623971	15.5953	14.9584	36513.8	29387.4	35579.9	54789.2	40828.9	39428.4
tRNA-Lys-CTT-4-1	Lys	Lys-CTT	AAG	GtRNAdb	chr3:3149492-3149565	+	GCCCAGCTAGCTCAGTCTGTAGAGCATGAGACTCTTAATCTCAGGGTCGTGAGTTCGAGCCCCACGTTGGGTGCCA	)))))))..))))........((((.))))).......(((((.....))).).......(.((((((((((....	66.7	15.4	0.18736	1.13868	0.574362	0.995715	4.64735	4.45999	23.7226	23.0814	23.0675	21.9586	32.3732	17.8275
tRNA-Lys-CTT-6-1	Lys	Lys-CTT	AAG	GtRNAdb	chr9:14958432-14958505	-	GTCCTGCTGGCTCAGTCGGTACAGCATGGGACTCTTAATCCCAGGGTCGTGGGTTCGAGCTCCACGTTGGGTACCA	)))).))..)))..........(((.))))).......(((((.....))))).......(((((((.((((....	61	10.4	-0.394442	0.760784	0.371227	0.995715	3.92293	4.31737	24.9087	20.1962	19.0307	15.859	17.7531	10.3994
tRNA-Lys-CTT-8-1	Lys	Lys-CTT	AAG	GtRNAdb	chr16:16854263-16854336	+	GCCCAGCTAGCTTAGTTGGTAGAGCATGAGACTCTTAATCTCAGAGTCATGGGTTCAGGCCTCATGTTTGGCACCA	))).)))..))))........((((.))))).......(((((.....))))).......((((((((.(((....	56.1	10.7	0.512922	1.42694	0.208134	0.995715	5.1646	4.65167	26.0949	23.0814	29.9878	15.859	58.4807	29.7125
tRNA-Lys-TTT-1-1	Lys	Lys-TTT	AAA,AAG	GtRNAdb	chr1:133033961-133034034	+	GCCCGGATAGCTCAGTCGGTAGAGCATCAGACTTTTAATCTGAGGGTCCAGGGTTCAAGTCCCTGTTCGGGCGCCA	)))))))..))))........((((.))))).......(((((.....))))).......((((((((((((....	87.8	20.5	0.0576002	1.04073	0.794038	0.995715	13.5522	13.4946	12596.7	11588.8	12622.5	10348.6	10595.4	12927.1
tRNA-Lys-TTT-2-1	Lys	Lys-TTT	AAA,AAG	GtRNAdb	chr7:28793987-28794060	-	GCCTGGATAGCTCAGTCGGTAGAGCATCAGACTTTTAATCTGAGGGTCCAGGGTTCAAGTCCCTGTTCAGGCGCCA	)))))))..))))........((((.))))).......(((((.....))))).......((((((((((((....	86.8	21.1	0.161232	1.11824	0.515627	0.995715	8.38505	8.22382	314.324	276.015	360.43	302.541	265.252	372.148
tRNA-Lys-TTT-3-1	Lys	Lys-TTT	AAA,AAG	GtRNAdb	chr13:21971787-21971860	+	GCCTGGATAGCTCAATTGGTAGAGCATCAGACTTTTAATCTGAGGGTTCAGGGTTCAAGTCCCTGTTCAGGCGCCA	)))))))..))))........((((.))))).......(((((.....))))).......((((((((((((....	82.7	21.1	0.021385	1.01493	0.943412	0.995715	5.30794	5.28656	45.0729	40.3924	39.2148	43.9172	27.1518	40.1118
tRNA-Lys-TTT-5-1	Lys	Lys-TTT	AAA,AAG	GtRNAdb	chr10:87829885-87829958	-	ACCTGGATAGCTCAGTTGGTAGAGCATCAGACTTTTAATCTGAGGCTCCAGGGTTCAAGTCCCTGTTCGAGCCCCA	.).))))..))))........((((.))))).......(((((.....))))).......(((((((((.(.....	63.3	11.4	-0.432851	0.740796	0.114608	0.995715	5.6049	6.03775	90.1459	63.4737	58.2455	36.5977	52.2149	49.7684
tRNA-Met-CAT-1-1	Met	Met-CAT	ATG	GtRNAdb	chr8:121579228-121579301	-	GCCTCGTTAGCGCAGTAGGTAGCGCGTCAGTCTCATAATCTGAAGGTCGTGAGTTCGATCCTCACACGGGGCACCA	)))))))..))))........((((.)))).........((((.....))))).......((((((((((((....	82.3	21.4	0.211562	1.15794	0.33575	0.995715	13.2095	12.998	10141.4	8266.97	7705.13	7464.71	9481.18	9978.18
tRNA-Met-CAT-2-1	Met	Met-CAT	ATG	GtRNAdb	chr13:21167603-21167676	+	GCCTCCTTAGCGCAGTAGGCAGCGCGTCAGTCTCATAATCTGAAGGTCCTGAGTTCGAACCTCAGAGGGGGCACCA	)))))))..))))........((((.)))).........((((.....))))).......((((((((((((....	77.4	22.4	0.186803	1.13824	0.390627	0.995715	10.5883	10.4015	1640.42	1386.81	1291.78	1305.32	1342.97	1702.52
tRNA-Met-CAT-3-1	Met	Met-CAT	ATG	GtRNAdb	chr13:21326716-21326789	-	GCCTTCTTAGCGCAGTAGGCAGCGCGTCAGTCTCATAATCTGAAGGTCCTGAGTTCGAACCTCAGAGAGGGCACCA	)))))))..))))........((((.)))).........((((.....))))).......((((((((((((....	77.1	22.6	0.0708385	1.05033	0.740411	0.995715	8.99925	8.92841	552.737	510.675	491.915	387.935	473.067	599.449
tRNA-Met-CAT-4-1	Met	Met-CAT	ATG	GtRNAdb	chr13:23317465-23317538	+	GCCTTCTTAGCGCAGTAGGCAGCGCGTCAGTCTCATAATCTGAAGGTCCTGAGTTCGAGCCTCAGAGAAGGCACCA	)))))))..))))........((((.)))).........((((.....))))).......((((((((((((....	76.9	24.4	-0.0662215	0.955136	0.819536	0.995715	6.15579	6.22202	103.193	66.3589	70.3559	58.5563	74.1452	69.8243
tRNA-Met-CAT-6-1	Met	Met-CAT	ATG	GtRNAdb	chr5:109723478-109723551	-	GCCTCCTTAGCATAGTAGGCAGCGCATCAGTCTCATAATCTGAAGGTCCTGAGTTTGAACCTCAGAGGGGTCACCA	).)))))..)).)........(.((.)))).........((((.....))))).......((((((((((.(....	53.1	11.3	0.20504	1.15272	0.638402	0.995715	5.03951	4.83447	43.8868	22.1196	25.951	29.2781	44.9048	19.3131
tRNA-Phe-GAA-1-1	Phe	Phe-GAA	TTC,TTT	GtRNAdb	chr5:125406054-125406127	-	GCCGAAATAGCTCAGTTGGGAGAGCGTTAGACTGAAGATCTAAAGGTCCCTGGTTCGATCCCGGGTTTCGGCACCA	)))))))..))))........((((.))))).......(((((.....))))).......((((((((((((....	88.9	20.5	-0.0805623	0.945689	0.72448	0.995715	12.7774	12.858	7646.98	8649.74	7406.98	4396.6	8179.99	7759.41
tRNA-Phe-GAA-2-1	Phe	Phe-GAA	TTC,TTT	GtRNAdb	chr19:12008544-12008617	+	GCTGAAATAGCTCAGTTGGGAGAGCGTTAGACTGAAGATCTAAAGGTCCCTGGTTCGATCCCGGGTTTCAGCACCA	)))))))..))))........((((.))))).......(((((.....))))).......((((((((((((....	87.2	22	-0.055464	0.962285	0.78088	0.995715	10.2577	10.3132	1260.86	1460.86	1337.92	889.324	1216.61	1400.94
tRNA-Phe-GAA-3-1	Phe	Phe-GAA	TTC,TTT	GtRNAdb	chr13:21882884-21882957	-	GCCGAAATAGCTCAGTTGGGAGAGCGTTAGACTGAAGATCTAAAGGTCCCTGGTTCAATCCCGGGTTTCGGCACCA	)))))))..))))........((((.))))).......(((((.....))))).......((((((((((((....	87.9	20.5	-0.0550499	0.962561	0.807066	0.995715	11.0455	11.1006	2033.03	2541.83	2429.59	1355.33	2478.12	2273.75
tRNA-Pro-AGG-1-1	Pro	Pro-AGG	CCA,CCC,CCT	GtRNAdb	chr1:165641633-165641705	+	GGCTCGTTGGTCTAGGGGTATGATTCTCGCTTAGGGTGCGAGAGGTCCCGGGTTCAAATCCCGGACGAGCCCCCA	)))))))..))).........(((.))))).......(((((.....))))).......((((((((((((....	70.2	26.4	-0.629282	0.646498	0.0373026	0.623971	9.43534	10.0646	1335.58	1007.89	1073.22	346.458	666.262	1027.31
tRNA-Pro-CGG-1-1	Pro	Pro-CGG	CCG	GtRNAdb	chr1:165642270-165642342	-	GGCTCGTTGGTCTAGGGGTATGATTCTCGCTTCGGGTGCGAGAGGTCCCGGGTTCAAATCCCGGACGAGCCCCCA	)))))))..))).........(((.))))).......(((((.....))))).......((((((((((((....	70.2	26.4	-0.268712	0.83006	0.300196	0.995715	13.454	13.7227	16097	12772.6	14243.6	6803.51	10550.5	15351.7
tRNA-Pro-TGG-1-1	Pro	Pro-TGG	CCA,CCG	GtRNAdb	chr7:98815414-98815486	+	GGCTCGTTGGTCTAGGGGTATGATTCTCGGTTTGGGTCCGAGAGGTCCCGGGTTCAAATCCCGGACGAGCCCCCA	)))))))..))).........(((.))))).......(((((.....))))).......((((((((((((....	70.5	26.2	-0.257993	0.836251	0.232062	0.995715	12.3437	12.6017	6713.5	6200.23	6904.69	3498.74	5383.36	6109.62
tRNA-Pro-TGG-2-1	Pro	Pro-TGG	CCA,CCG	GtRNAdb	chr3:51358353-51358425	+	GGCTCGTTGGTCTAGGGGTATGATTCTCGCTTTGGGTGCGAGAGGTCCCGGGTTCAAATCCCGGACGAGCCCCCA	)))))))..))).........(((.))))).......(((((.....))))).......((((((((((((....	70.3	26.4	-0.427439	0.74358	0.158814	0.995715	12.8917	13.3191	10347.8	10794.4	11450.7	3481.66	8841.03	10179.5
tRNA-Pro-TGG-3-1	Pro	Pro-TGG	CCA,CCG	GtRNAdb	chr11:67291138-67291210	+	GGTTTGTTGGTCTAGTGGTATGATTCTCAGTTTGGGTTTGAGAGGTCCTGGGTTCAAATCCCAGACGAGCCCCCA	)))))))..))).........(((.))))).......(((((.....))))).......((((((((((((....	55.7	17.9	-0.363741	0.777147	0.284852	0.995715	4.71351	5.07725	34.3978	43.2776	30.5645	18.2988	35.5061	21.5415
tRNA-Pro-TGG-4-1	Pro	Pro-TGG	CCA,CCG	GtRNAdb	chrX:14702615-14702687	-	GGCTCGTTGGTCTAGGGGTATGATTCTCACTTTGGGTGTGAGAGGTCCTGGGTTCAAATCCCAGGTGAGCCCCCA	)))))))..))).........(((.))))).......(((((.....))))).......((((((((((((....	55.7	22.7	-0.358643	0.779898	0.158546	0.995715	11.0663	11.425	3468.24	2547.61	2755.42	1302.88	2069.8	2869.48
tRNA-SeC-TCA-1-1	SeC	SeC-TCA	TGA,TGG	GtRNAdb	chr7:19301243-19301330	+	GCCCGGATGATCCTCAGTGGTCTGGGGTGCAGGCTTCAAACCTGTAGCTGTTTAGCGACAGAGTGGTTCAATTCCACCTTTCGGGCGCCA	))))))).)..))))))....(((((()))))).......((((((.)))))....(((((.)))).......(((((.(((((((....	146.4	0	0.385913	1.30669	0.0601708	0.851648	11.3045	10.9186	2218.06	1937.87	2018.98	2131.21	2480.21	2529.27
tRNA-Ser-AGA-2-1	Ser	Ser-AGA	TCA,TCC,TCT	GtRNAdb	chr4:10874063-10874145	+	GTAGTCGTGGCCGAGTGGTTAAGGCGATGGACTAGAAATCCATTGGGGTCTCCCCGCGCAGGTTCGAATCCTGCCGACTACGCCA	)))))))..)))..........(((.))))).......(((((.))))...((((..))))).......((((((((((((....	89.6	32.7	-0.277223	0.825178	0.305257	0.995715	10.8118	11.0891	2314.14	2395.65	2242.16	906.403	2311.03	2059.82
tRNA-Ser-AGA-3-1	Ser	Ser-AGA	TCA,TCC,TCT	GtRNAdb	chrX:166909732-166909814	-	GTAGTCGTGGCCAAGTGAGTAAGGCAATGGACTAGAAATCCATTGGGGTCTCCCAGCACAGGTTCAAATCCTGCTGACTATGCCA	)))))))..)))..........(((.))))).......(((((..)))...(((....)))).......((((.(((((((....	56.6	24.6	-0.0210483	0.985516	0.968367	0.995715	5.52507	5.54611	36.77	59.6269	51.9019	9.75938	69.968	57.1965
tRNA-Ser-CGA-1-1	Ser	Ser-CGA	TCG	GtRNAdb	chr11:69110918-69111000	+	GCTGTGATGGCCGAGTGGTTAAGGCGTTGGACTCGAAATCCAATGGGGTCTCCCCGCGCAGGTTCGAATCCTGCTCACAGCGCCA	)))))))..)))..........(((.))))).......(((((.))))...((((..))))).......((((((((((((....	95.1	29	-0.100399	0.932775	0.620616	0.995715	10.2411	10.3415	1394.89	1373.34	1370.79	803.929	1309.55	1375.69
tRNA-Ser-CGA-2-1	Ser	Ser-CGA	TCG	GtRNAdb	chr10:128458463-128458545	-	GTCACGGTGGCCGAGTGGTTAAGGCGTTGGACTCGAAATCCAATGGGGTTTCCCCGCACAGGTTCGAATCCTGTTCGTGACGCCA	)))))))..)))..........(((.))))).......(((((.))))...((((..))))).......((((((((((((....	89.6	28.3	-0.0971514	0.934877	0.63332	0.995715	10.5194	10.6166	1500.45	1699.37	1804.46	1100.37	1563.31	1524.99
tRNA-Ser-CGA-3-1	Ser	Ser-CGA	TCG	GtRNAdb	chr13:22022418-22022500	-	GCTGTGATGGCCGAGTGGTTAAGGCGTTGGACTCGAAATCCAATGGGTTCTTCCCGCGCAGGTTCAAATCCTGCTCACAGCGCCA	)))))))..)))..........(((.))))).......(((((..))......((..))))).......((((((((((((....	90.1	28.2	-0.127415	0.91547	0.557345	0.995715	7.33047	7.45789	192.153	204.847	165.509	112.233	169.176	179.018
tRNA-Ser-GCT-1-1	Ser	Ser-GCT	AGC,AGT	GtRNAdb	chr13:21994189-21994271	-	GACGAGGTGGCCGAGTGGTTAAGGCGATGGACTGCTAATCCATTGTGCTCTGCACGCGTGGGTTCGAATCCCACCTTCGTCGCCA	)))))))..)))..........(((.))))).......(((((.))))...((((..))))).......((((((((((((....	91	27.6	-0.130735	0.913366	0.546444	0.995715	10.3772	10.5079	1559.76	1557.03	1528.8	824.668	1547.65	1479.68
tRNA-Ser-GCT-2-1	Ser	Ser-GCT	AGC,AGT	GtRNAdb	chr2:119046749-119046831	-	GACGAGGTGGCCGAGTGGTTAAGGCGATGGACTGCTAATCCATTGTGCTCTGCACGCATGGGTTCGAATCCCATCCTCGTCGCCA	)))))))..)))..........(((.))))).......(((((.))))...((((..))))).......((((((((((((....	89.7	30.4	-0.301682	0.811306	0.243585	0.995715	10.2064	10.5081	1562.13	1591.65	1493.62	613.621	1479.77	1368.26
tRNA-Ser-GCT-3-1	Ser	Ser-GCT	AGC,AGT	GtRNAdb	chr19:5038303-5038385	-	GACGAGGTGGCCGAGTGGTTAAGGCGATGGACTGCTAATCCATTGTGCTTTGCACGCGTGGGTTCGAATCCCATCCTCGTCGCCA	)))))))..)))..........(((.))))).......(((((.))))...((((..))))).......((((((((((((....	89.1	27	-0.289074	0.818427	0.156944	0.995715	9.99649	10.2856	1251.37	1481.05	1252.57	727.074	1144.55	1054.79
tRNA-Ser-GCT-4-1	Ser	Ser-GCT	AGC,AGT	GtRNAdb	chr11:69063041-69063123	-	GACGAGGTGGCCGAGTGGTTAAGGCGATGGACTGCTAATCCATTGTGCTCTGCACGCGTGGGTTCGAATCCCATCCTCGTCGCCA	)))))))..)))..........(((.))))).......(((((.))))...((((..))))).......((((((((((((....	88.4	26.8	-0.188773	0.877352	0.401528	0.995715	10.6149	10.8037	2106.57	1721.48	1873.08	971.059	1759.64	1815.43
tRNA-Ser-GCT-5-1	Ser	Ser-GCT	AGC,AGT	GtRNAdb	chr13:21492844-21492926	-	GATGAGGTGGCCGAGTGGTTAAGGCGATGGACTGCTAATCCATTGTGCTCTGCACGCATGGGTTCGAATCCCATCCTCATCGCCA	)))))))..)))..........(((.))))).......(((((.))))...((((..))))).......((((((((((((....	88	31.9	-0.000975374	0.999324	0.965146	0.995715	6.28891	6.28988	85.4014	80.7848	83.0431	42.6973	84.5881	97.3083
tRNA-Ser-GGA-1-1	Ser	Ser-GGA	TCC,TCT	GtRNAdb	chr11:100538157-100538230	+	GCTGAAATAGCTCAGTTGGGAGAGCATTAGACTGGAGATCTAAAGGTCCCTGGTTTGATCCCGGGTTTCGGCACCA	)))))))..))))........((((.))))).......(((((.....))))).......((((((((((((....	77.6	17.5	0.163048	1.11965	0.448403	0.995715	7.19679	7.03374	147.08	135.603	135.522	119.552	146.202	150.791
tRNA-Ser-TGA-1-1	Ser	Ser-TGA	TCA,TCG	GtRNAdb	chr10:63429475-63429557	-	GCAGCGATGGCCGAGTGGTTAAGGCGTTGGACTTGAAATCCAATGGGGTCTCCCCGCGCAGGTTCGAACCCTGCTCGCTGCGCCA	)))))))..)))..........(((.))))).......(((((.))))...((((..))))).......((((((((((((....	94	29.5	-0.171033	0.888206	0.453368	0.995715	11.1447	11.3157	2541.88	2869.78	2721.39	1358.99	2632.68	2585.73
tRNA-Ser-TGA-2-1	Ser	Ser-TGA	TCA,TCG	GtRNAdb	chr13:21924934-21925016	-	GTAGTCGTGGCCGAGTGGTTAAGGCGATGGACTTGAAATCCATTGGGGTTTCCCCGCGCAGGTTCGAATCCTGCCGACTACGCCA	)))))))..)))..........(((.))))).......(((((.))))...((((..))))).......((((((((((((....	90.4	32.9	0.0531253	1.03751	0.831077	0.995715	7.52531	7.47218	177.919	179.842	206.454	126.872	169.176	231.757
tRNA-Thr-AGT-2-1	Thr	Thr-AGT	ACA,ACC,ACT	GtRNAdb	chr13:23450621-23450695	+	GGCTCCGTGGCTTAGCTGGTTAAAGCGCCTGTCTAGTAAACAGGAGATCCTGGGTTCGAATCCCAGCGGGGCCTCCA	)))))))..)))).........((((.))))).......(((((.....))))).......((((((((((((....	81.4	20.9	-0.0104574	0.992778	0.962513	0.995715	9.60405	9.61451	954.835	797.269	751.424	642.899	685.06	877.26
tRNA-Thr-AGT-4-1	Thr	Thr-AGT	ACA,ACC,ACT	GtRNAdb	chr13:21856020-21856094	+	GGCTCCGTGGCTTAGCTGGTTAAAGCGCCTGTCTAGTAAACAGGAGATCCTGGGTTCAAATCCCAGCGGGGCCTCCA	)))))))..)))).........((((.))))).......(((((.....))))).......((((((((((((....	80.4	21	-0.00589209	0.995924	0.97487	0.995715	9.42406	9.42995	789.962	724.178	687.989	481.87	711.167	778.466
tRNA-Thr-AGT-5-1	Thr	Thr-AGT	ACA,ACC,ACT	GtRNAdb	chr13:22030099-22030173	-	GGCCTTGTGGCTTAGCTGGTCAAAGCGCCTGTCTAGTAAACAGGAGATCCTGGGTTCGAATCCCAGCAAGGCCTCCA	)))))))..)))).........((((.))))).......(((((.....))))).......((((((((((((....	81.9	22.7	-0.0513083	0.965061	0.816201	0.995715	6.69756	6.74887	136.405	105.79	102.65	75.6352	101.297	118.85
tRNA-Thr-AGT-6-1	Thr	Thr-AGT	ACA,ACC,ACT	GtRNAdb	chr13:21249193-21249267	-	GGCTCTGTGGCTTAGCTGGTTAAAGCGCCTGTCTAGTAAACAGGAGATCCTGGGTTCAAATCCCAGCAGGGCCTCCA	)))))))..)))).........((((.))))).......(((((.....))))).......((((((((((((....	79.7	21.3	-0.0789241	0.946763	0.729351	0.995715	6.59868	6.6776	123.358	112.522	92.8468	70.7555	105.474	100.28
tRNA-Thr-CGT-1-1	Thr	Thr-CGT	ACG	GtRNAdb	chr16:13437322-13437394	+	GGCGCGGTGGCCAAGTGGTAAGGCGTCGGTCTCGTAAACCGAAGATCACGGGTTCGAACCCCGTCCGTGCCTCCA	)))))))..))).........(((.))))).......(((((.....))))).......((((((((((((....	79.6	23.6	0.0303326	1.02125	0.891369	0.995715	11.1955	11.1652	2623.72	2316.79	2385.76	2123.89	1982.08	2473.56
tRNA-Thr-CGT-2-1	Thr	Thr-CGT	ACG	GtRNAdb	chr11:79704649-79704721	+	GGCGCGGTGGCCAAGTGGTAAGGCGTCGGTCTCGTAAACCGAAGATCGCGGGTTCGAACCCCGTCCGTGCCTCCA	)))))))..))).........(((.))))).......(((((.....))))).......((((((((((((....	78.3	20.1	0.0146226	1.01019	0.946895	0.995715	10.4482	10.4336	1635.67	1315.64	1459.6	1247.98	1224.96	1452.2
tRNA-Thr-CGT-3-1	Thr	Thr-CGT	ACG	GtRNAdb	chr13:21322812-21322886	+	GGCTCCATGGCTTAGCTGGTTAAAGCGCCTGTCTCGTAAACAGGAGATCCTGGGTTCGACTCCCAGTGGGGCCTCCA	)))))))..)))).........((((.))))).......(((((.....))))).......((((((((((((....	78.2	21.2	0.167132	1.12282	0.4695	0.995715	7.09405	6.92692	150.638	120.215	118.798	109.793	132.626	145.591
tRNA-Thr-CGT-4-1	Thr	Thr-CGT	ACG	GtRNAdb	chr13:21264579-21264653	+	GGCTCCGTGGCTTAGTTGGCTAAAGCGCCTGTCTCGTAAACAGGAGATCCTGGGTTCGAATCCCAGTGGGGCCTCCA	)))))))..)))).........((((.))))).......(((((.....))))).......((((((((((((....	76.5	18.2	0.460644	1.37616	0.200293	0.995715	4.56369	4.10304	15.4197	16.3493	21.3375	13.4192	20.886	31.9409
tRNA-Thr-TGT-1-1	Thr	Thr-TGT	ACA,ACG	GtRNAdb	chr13:21275955-21276029	+	GGCTCCATGGCTTAGTTGGTTAAAGCGCCTGTCTTGTAAACAGGAGATCCTGGGTTCGAATCCCAGTGGGGCCTCCA	)))))))..)))).........((((.))))).......(((((.....))))).......((((((((((((....	83.6	21.3	-0.0450044	0.969287	0.88998	0.995715	5.39729	5.4423	35.5839	53.8565	47.8651	21.9586	51.1706	47.5399
tRNA-Thr-TGT-2-1	Thr	Thr-TGT	ACA,ACG	GtRNAdb	chr14:51088649-51088722	+	GGCCCTATAGCTCAGGGGTTAGAGCACTGGTCTTGTAAACCAGGGGTCGCGAGTTCAAATCTCGCTGGGGCCTCCA	)))))))..))))........((((.))))).......(((((.....))))).......((((((((((((....	78	23.2	0.0558041	1.03944	0.880489	0.995715	4.86184	4.80604	34.3978	29.8134	25.951	28.0582	22.9746	31.1981
tRNA-Thr-TGT-3-1	Thr	Thr-TGT	ACA,ACG	GtRNAdb	chr11:48853618-48853691	+	GGCTCCATAGCTCAGGGGTTAGAGCACTGGTCTTGTAAACCAGGGGTCGCGAGTTCAAATCTCGCTGGGGCCTCCA	)))))))..))))........((((.))))).......(((((.....))))).......((((((((((((....	78.8	24.1	0.308085	1.23806	0.254399	0.995715	7.50635	7.19827	175.547	145.22	148.209	185.428	140.98	179.76
tRNA-Trp-CCA-2-1	Trp	Trp-CCA	TGG	GtRNAdb	chr10:91181411-91181483	-	GACCTCGTGGCGCAACGGTAGCGCGTCTGACTCCAGATCAGAAGGCTGCGTGTTCGAATCACGTCGGGGTCACCA	)))))))..)))).......((((.))))).......(((((.....))))).......((((((((((((....	74.3	22.7	-0.00878033	0.993932	0.969216	0.995715	12.1149	12.1237	4884.48	4917.29	4443.38	2683.83	5270.57	4922.61
tRNA-Trp-CCA-3-1	Trp	Trp-CCA	TGG	GtRNAdb	chr11:69041825-69041897	+	GGCCTCGTGGCGCAACGGTAGCGCGTCTGACTCCAGATCAGAAGGTTGCGTGTTCAAATCACGTCGGGGTCACCA	)))))))..)))).......((((.))))).......(((((.....))))).......((((((((((((....	73.4	20.4	0.039324	1.02763	0.89128	0.995715	6.72778	6.68845	93.7043	110.598	122.258	70.7555	97.1197	135.192
tRNA-Trp-CCA-5-1	Trp	Trp-CCA	TGG	GtRNAdb	chr11:61407915-61407987	-	GACCTCGTGGCGCAATGGTAGCGCGTCTGACTCCAGATCAGAAGGTTGCGTGTTCAAGTCACGTCGGGGTCACCA	)))))))..)))).......((((.))))).......(((((.....))))).......((((((((((((....	75.1	22.7	0.0113395	1.00789	0.959129	0.995715	11.688	11.6766	3488.41	3810.35	3155.64	2198.3	3557.92	3760.85
tRNA-Tyr-GTA-1-1	Tyr	Tyr-GTA	TAC,TAT	GtRNAdb	chr13:23425645-23425734	-	CCTTCGATAGCTCAGTTGGTAGAGCGGAGGACTGTAGATCCTTAGGTCGCTGGTTCGAATCCGGCTCGAAGGACCA	)))))))..))))........((((.))))).......(((((.....))))).......((((((((((((....	78	27.9	0.016865	1.01176	0.950312	0.995715	12.6253	12.6084	5858.3	7587.04	6491.2	3629.27	8454.64	6293.1
tRNA-Tyr-GTA-4-1	Tyr	Tyr-GTA	TAC,TAT	GtRNAdb	chr3:19628354-19628447	+	CCTTCGATAGCTCAGCTGGTAGAGCGGAGGACTGTAGATCCTTAGGTCGCTGGTTCGACTCCGGCTCGAAGGACCA	)))))))..))))........((((.))))).......(((((.....))))).......((((((((((((....	72.5	27.9	0.0157221	1.01096	0.951211	0.995715	12.2068	12.1911	4650.82	5467.4	4809	2713.11	6099.75	4947.12
tRNA-Tyr-GTA-5-1	Tyr	Tyr-GTA	TAC,TAT	GtRNAdb	chr13:23428737-23428826	-	CTTTCGATAGTTCAGTTGGTAGAGCGGAGGACTGTAGATCCTTAGGTCGCTGGTTCGAGTCCGGCTCGAAGGACCA	)))))))..))))........((((.))))).......(((((.....))))).......((((((((((((....	66.4	20.3	-0.177985	0.883937	0.54329	0.995715	6.00584	6.18383	78.2846	81.7465	72.086	35.3778	89.8096	60.1677
tRNA-Val-AAC-1-1	Val	Val-AAC	GTA,GTC,GTT	GtRNAdb	chr3:30601269-30601342	+	GTTTCCGTAGTGTAGTGGTTATCACGTTCGCCTAACACGCGAAAGGTCCCCGGTTCGAAACCGGGCGGAAACACCA	)))))))..)))..........(((.))))).......(((((.....))))).......((((((((((((....	79.4	30.1	0.136711	1.0994	0.680882	0.995715	5.89533	5.75862	73.5401	57.7034	43.2516	68.3157	44.9048	51.9968
tRNA-Val-AAC-4-1	Val	Val-AAC	GTA,GTC,GTT	GtRNAdb	chr13:23298780-23298853	+	GTTTCTGTAGTGTAGTGGTTATCACGCTCGCCTAACACGCGAGAGGTCCCCGGTTCGAAACCGGGCAGAAACACCA	)))))))..)))..........(((.))))).......(((((.....))))).......((((((((((((....	78.4	30.5	0.244943	1.18505	0.380807	0.995715	12.3627	12.1178	4565.41	4729.76	4880.51	5711.68	4242.98	4468.01
tRNA-Val-AAC-5-1	Val	Val-AAC	GTA,GTC,GTT	GtRNAdb	chr13:22015790-22015863	-	GTTTCCGTAGTGTAGTGGTTATCACATTCGCCTAACACGCGAAAGGTCCCCGGTTCGAAACCGGGCGGAAACACCA	)))))))..)))..........(((.))))).......(((((.....))))).......((((((((((((....	78.1	30	0.265408	1.20198	0.355778	0.995715	9.91414	9.64874	805.382	776.111	974.603	1046.69	724.743	876.517
tRNA-Val-CAC-1-1	Val	Val-CAC	GTG	GtRNAdb	chr13:23307628-23307701	+	GTTTCCGTAGTGTAGTGGTTATCACGCTCGCCTCACACGCGAGAGGTCCCCGGTTCGAAACCGGGCGGAAACACCA	)))))))..)))..........(((.))))).......(((((.....))))).......((((((((((((....	79.1	30.1	0.30425	1.23478	0.290797	0.995715	8.98919	8.68494	423.448	447.201	441.743	563.604	396.833	431.573
tRNA-Val-CAC-2-1	Val	Val-CAC	GTG	GtRNAdb	chr1:171111442-171111515	+	GTTTCCGTAGTGTAGTGGTTATCACGTTCGCCTCACACGCGAAAGGTCCCCGGTTCGAAACCGGGCGGAAACACCA	)))))))..)))..........(((.))))).......(((((.....))))).......((((((((((((....	79.4	30.1	0.189768	1.14058	0.48679	0.995715	10.4541	10.2644	1165.97	1364.69	1390.97	1504.16	1119.49	1228.61
tRNA-Val-CAC-3-1	Val	Val-CAC	GTG	GtRNAdb	chr13:23300121-23300194	+	GTTTCCGTAGTGTAGTGGTCATCACGCTCGCCTCACACGCGAGAGGTCCCCGGTTCGAAACCGGGCGGGAACACCA	)))))))..)))..........(((.))))).......(((((.....))))).......((((((((((((....	78.7	28.4	0.320859	1.24907	0.270149	0.995715	8.24116	7.9203	250.273	278.9	243.939	334.259	260.03	236.214
tRNA-Val-CAC-4-1	Val	Val-CAC	GTG	GtRNAdb	chr6:10100370-10100443	+	GTTTCTGTAGTGTAGTGGTTATCACGTTCGCCTCACACGCGAAAGGTCCCCGGTTCGAAACCGGGCAGAAACACCA	)))))))..)))..........(((.))))).......(((((.....))))).......((((((((((((....	78.7	30.5	-0.13184	0.912667	0.67572	0.995715	6.6588	6.79064	103.193	114.445	133.215	102.474	81.4553	98.7939
tRNA-Val-CAC-7-1	Val	Val-CAC	GTG	GtRNAdb	chr3:59474925-59474997	-	GTTTCTGTAGTGTAGTGGTTTCACATTTGCCTCACATGCAAAAGGTCCCCGGTTCTCAACCGGGCAGAAACACCA	)))))))..))).........(((.))))).......(((((.....))))).......((((((((((((....	55.4	30	0.0273246	1.01912	0.92825	0.995715	5.04668	5.01935	36.77	34.622	32.2945	28.0582	40.7276	25.9984
tRNA-Val-TAC-1-1	Val	Val-TAC	GTA,GTG	GtRNAdb	chr19:12011930-12012003	+	GGTTCCATAGTGTAGCGGTTATCACGTCTGCTTTACACGCAGAAGGTCCTGGGTTCGAGCCCCAGTGGAACCACCA	)))))))..)))..........(((.))))).......(((((.....))))).......((((((((((((....	80.5	28.2	-0.0835655	0.943722	0.696693	0.995715	13.7577	13.8412	13869.4	16984	15978.3	10609.7	14517.8	14328.1

## Sheet: MRcount Ala-G35C_vs_WT-Ala-AGC
#Gene biotype: tRNA #Count type: mrcount #Condition pair: FH-Ala-G35C_vs_FH-WT-Ala-AGC-6-1 Column A: Isodecoder, The name of tRNA isodecoder (tRNA bearing the same anticodons but with sequence variations in the tRNA body). Column B: Isotype, The name of tRNA isotype (tRNA encoding the same amino acid). Column C: Isoacceptor, The name of tRNA isoacceptor (tRNA carrying the same amino acids but wit…
Annotation											DE Statistic						CPM
Isodecoder	Isotype	Isoacceptor	Codon	Source	Locus	Stand	Sequence	Structure	tRNAscanScore	tRNAscanSSS	log2FC	Fold_Change	p_value	q_value	FH-Ala-G35C_CPM	FH-WT-Ala-AGC-6-1_CPM	FH-WT-Ala-AGC-6-1-2	FH-WT-Ala-AGC-6-1-3	FH-WT-Ala-AGC-6-1-4	FH-Ala-G35C-1	FH-Ala-G35C-2	FH-Ala-G35C-3
tRNA-Ala-AGC-2-1	Ala	Ala-AGC	GCA,GCC,GCT	GtRNAdb	chr13:21222585-21222657	+	GGGGGTGTAGCTCAGTGGTAGAGCGCGTGCTTAGCATGCACGAGGCCCCGGGTTCAATCCCCGGCACCTCCACCA	)))))))..)))).......((((.))))).......(((((.....))))).......((((((((((((....	84.7	23.6	-0.408573	0.753368	0.360528	0.982022	9.08305	9.49163	1105.86	575.861	543.512	702.298	414.719	385.449
tRNA-Ala-AGC-1-1	Ala	Ala-AGC	GCA,GCC,GCT	GtRNAdb	chr13:21242569-21242641	+	GGGGGTGTAGCTCAGTGGTAGAGCGCGTGCTTAGCATGCACGAGGCCCTGGGTTCGATCCCCAGCACCTCCACCA	)))))))..)))).......((((.))))).......(((((.....))))).......((((((((((((....	85.3	24.1	-0.397461	0.759193	0.218342	0.882453	5.92267	6.32013	109.236	65.1633	74.1716	74.5803	45.4274	51.5078
tRNA-Ala-AGC-4-1	Ala	Ala-AGC	GCA,GCC,GCT	GtRNAdb	chr3:19628994-19629067	+	GGGGGATTAGCTCAAATGGTAGAGCGCTCGCTTAGCATGCGAGAGGTAGCGGGATCGATGCCCGCATCCTCCACCA	)))))))..))))........((((.))))).......(((((.....))))).......((((((((((((....	59.7	23.6	-0.27458	0.826691	0.163212	0.837061	8.62479	8.89937	547.204	458.755	480.864	382.732	409.069	340.467
tRNA-Ala-AGC-10-1	Ala	Ala-AGC	GCA,GCC,GCT	GtRNAdb	chr13:23412940-23413013	-	GGGGGATTAGCTCAAATGGTAGAGCGCTCGCTTAGCATGCAAGAGGTAGTGGGATCGATGCCCACATCCTCCACCA	)))))))..))))........((((.)).)).......((.((.....))))).......((((((((((((....	52.7	17.2	-0.254984	0.837996	0.300644	0.927055	5.90087	6.15585	78.6686	64.5513	78.7067	60.7942	66.2946	45.8095
tRNA-Ala-AGC-5-1	Ala	Ala-AGC	GCA,GCC,GCT	GtRNAdb	chr13:23285648-23285721	+	GGGGGATTAGCTCAAATGGTAGAGCGCTCGCTTAGCATGCGAGAGGTAGTGGGATCGATGCCCACATCCTCCACCA	)))))))..))))........((((.))))).......(((((.....))))).......((((((((((((....	59.3	24.1	-0.215658	0.861153	0.366993	0.982022	7.13081	7.34647	209.425	137.1	159.743	142.381	129.475	129.406
tRNA-Ala-TGC-1-1	Ala	Ala-TGC	GCA,GCG	GtRNAdb	chr13:21240944-21241016	+	GGGGGTGTAGCTCAGTGGTAGAGCGCATGCTTTGCATGCATGAGGCCCCGGGTTCGATCCCCGGCACCTCCACCA	)))))))..)))).......((((.))))).......(((((.....))))).......((((((((((((....	84.9	24.3	-0.215647	0.86116	0.489711	0.982022	7.6599	7.87554	316.515	193.776	218.599	245.211	170.275	151.818
tRNA-Ala-CGC-3-1	Ala	Ala-CGC	GCG	GtRNAdb	chrX:136379365-136379437	-	GGGGATGTAGCTCAGAGGTAGAGCACATGCTTCGCATGTGTGTGGTCCCGGGTTCGACTCCCGGCATCTCCACCA	)))))))..)))).......((((.))))).......(((((.....))))).......((((((((((((....	64.5	19.6	-0.168512	0.88976	0.401901	0.982022	5.71612	5.88463	63.0269	62.5927	59.0548	36.2731	64.1589	52.7812
tRNA-Ala-CGC-6-1	Ala	Ala-CGC	GCG	GtRNAdb	chrX:136567864-136567936	-	GGGGATGTAGCTCAGAGGTAGAGCACATGCTTCGCATGTGTGTGGTCCCGGGTTCGACTCCCAGCATCTCCACCA	)))))))..)))).......((((.))))).......(((((.....).))).......(((.((((((((....	56.6	12.3	-0.108749	0.927392	0.621929	0.989654	5.13214	5.24089	38.8998	45.4552	34.4713	28.8151	40.3107	33.0439
tRNA-Ala-CGC-5-1	Ala	Ala-CGC	GCG	GtRNAdb	chr4:132125258-132125330	+	TCCCTGGTAGTCTAGTGGTTAGGATTCGGTGCTCGCACCGCCGTGGCCCAGGTTTGAATCCTAGTCAGGGAACCA	)))))))..))))........((((.))))).......(((((....).))).......(((.((((((((....	58.7	18.6	-0.0856362	0.942369	0.567162	0.982022	9.65805	9.74368	839.387	940.645	896.28	673.256	833.977	835.458
tRNA-Ala-TGC-5-1	Ala	Ala-TGC	GCA,GCG	GtRNAdb	chrX:136380746-136380818	+	GGGGATGTAGCTCAGCGGTAGAGCACATGCTTTGCATGTATGGGGTCCCGGGTTCGATTCCCGGCATCTCCACCA	)))))))..)))).......((((.))))).......(((((.....))))).......((((((((((((....	73.8	24.4	-0.0175264	0.987925	0.933555	0.998086	7.95186	7.96938	231.099	289.42	262.166	219.955	255.123	240.603
tRNA-Ala-CGC-2-1	Ala	Ala-CGC	GCG	GtRNAdb	chr2:57182077-57182149	+	GGGGATGTAGCTCAGTGGTAGAGCGCGCGCTTCGCATGTGTGAGGTCCCGGGTTCAATCCCCGGCATCTCCACCA	)))))))..)))).......((((.))))).......(((((.....))))).......((((((((((((....	74.4	20	-0.0175202	0.987929	0.90796	0.991657	9.95266	9.97018	968.303	1152.42	1012.36	752.752	1078.91	1060.43
tRNA-Ala-TGC-6-1	Ala	Ala-TGC	GCA,GCG	GtRNAdb	chrX:136590364-136590436	+	GGGGATGTAGCTCAATGGTAGAGCACATGCTTTGCATGTATGAGGCACCGGGTTCGATTCCCGGCATCTCCACCA	)))))))..)))).......((((.))))).......(((((.....))))).......((((((((((((....	69.9	24.3	-0.0173066	0.988076	0.925264	0.998086	7.53064	7.54795	168.378	223.685	192.504	142.268	200.263	195.876
tRNA-Ala-AGC-6-1	Ala	Ala-AGC	GCA,GCC,GCT	GtRNAdb	chr13:23431411-23431484	+	GGGGAATTAGCTCAAATGGTAGAGCGCTCGCTTAGCATGCGAGAGGTAGCGGGATCGATGCCCGCATTCTCCACCA	)))))))..))))........((((.))))).......(((((.....))))).......((((((((((((....	58.9	24	-0.00124386	0.999138	1	1	8.01079	8.01204	249.143	261.143	294.208	211.932	260.818	275.653
tRNA-Ala-TGC-4-1	Ala	Ala-TGC	GCA,GCG	GtRNAdb	chr5:125409471-125409543	+	GGGGATGTAGCTCAGTGGTAGAGCGCATGCTTTGCATGTATGAGGCCCCGGGTTCAATCCCCGGCATCTCCACCA	)))))))..)))).......((((.))))).......(((((.....))))).......((((((((((((....	78.7	24.4	0.00193291	1.00134	0.991649	1	10.1481	10.1462	1039	1301.47	1200.82	869.934	1208.21	1231.51
tRNA-Ala-CGC-7-1	Ala	Ala-CGC	GCG	GtRNAdb	chrX:136569762-136569835	+	GGGGATGTAGCTCAGAGGTAGAGCACGTGCTTCGCATGTGTGTGGTCCCGGGGTTCGATTCCCGGCATCTCCACCA	)))))))..)))).......((((.))))).......(((((.....))).)).......((((((((((((....	57.4	14.4	0.00633031	1.0044	1	1	5.21302	5.20669	40.5355	38.1514	36.8999	24.8036	44.404	38.5513
tRNA-Ala-TGC-2-1	Ala	Ala-TGC	GCA,GCG	GtRNAdb	chr5:125404249-125404321	-	GGGGATGTAGCTCAGTGGTAGAGCGCATGCTTTGCATGTATGAGGCCCCGGGTTCGATCCCCGGCATCTCCACCA	)))))))..)))).......((((.))))).......(((((.....))))).......((((((((((((....	79.7	24.4	0.00656694	1.00456	0.966884	1	10.7433	10.7368	1657.31	1894.06	1776.97	1385.61	1871.64	1725.03
tRNA-Ala-CGC-1-1	Ala	Ala-CGC	GCG	GtRNAdb	chr13:21254219-21254291	+	GGGGATGTAGCTCAGTGGTAGAGCGCATGCTTCGCATGTATGAGGCCCCGGGTTCGATCCCCGGCATCTCCACCA	)))))))..)))).......((((.))))).......(((((.....))))).......((((((((((((....	79.7	24.4	0.00820321	1.0057	0.957902	1	10.6338	10.6255	1569.13	1743.05	1619.31	1314.7	1667.2	1627.46
tRNA-Ala-AGC-7-1	Ala	Ala-AGC	GCA,GCC,GCT	GtRNAdb	chr19:3576262-3576335	+	GGGGAATTAGCTCAAATGGTAGAGCGCTCGCTTAGCATGTGAGAGGTAGCGGGATCGATGCCCGCATTCTCCACCA	)))))))..))))........((((.))))).......(((((.....))))).......((((((((((((....	54.6	23.8	0.0345355	1.02423	0.842478	0.991657	7.65284	7.61831	181.873	202.671	227.595	154.924	228.872	202.657
tRNA-Ala-CGC-4-1	Ala	Ala-CGC	GCG	GtRNAdb	chrX:136367720-136367792	+	GGGGTTGTAGCTCAGAGGTAGAGCACATGCTTCGCATGTGTGTGGTCCCGGGTTCGATTCCCGGCATCTCCACCA	)))).))..)))).......((((.))))).......(((((.....))))).......(((((((.((((....	63.6	14.9	0.100924	1.07246	0.720763	0.991657	4.58383	4.48291	21.5201	27.012	21.4609	20.1706	18.6871	29.8924
tRNA-Ala-AGC-3-1	Ala	Ala-AGC	GCA,GCC,GCT	GtRNAdb	chr13:21259767-21259839	+	GGGGATGTAGCTCAGTGGTAGAGCGCATGCTTAGCATGCATGAGGTCCTGGGTTCGATCCCCAGCATCTCCACCA	)))))))..)))).......((((.))))).......(((((.....))))).......((((((((((((....	83.6	25.2	0.129139	1.09364	0.455617	0.982022	9.9603	9.83117	1009.5	946.97	882.179	938.299	896.712	1024.49
tRNA-Ala-TGC-8-1	Ala	Ala-TGC	GCA,GCG	GtRNAdb	chrX:136357601-136357673	+	GGGGATGTAGCTCAGTGGTAGAGCACATGCTTTGCATGTATGGGGTCCTGGGTTCAATTCCCGGCATCTCCACCA	)))))))..)))).......((((.))))).......(((((.....))))).......((((((((((((....	71.9	21.3	0.198193	1.14726	0.259487	0.912137	8.95232	8.75412	394.519	491.03	463.17	343.521	560.212	549.364
tRNA-Ala-AGC-8-1	Ala	Ala-AGC	GCA,GCC,GCT	GtRNAdb	chr4:132516007-132516079	+	GGGGATGTAGCTCAGTGGTAGAGCGCATGCTTAGCATGCATGAGGTCCTGGGTTCGATCTCCAGGTTTTTTTCCA	)))))....)))).......((((.))))).......(((((.....))))).......(((((..(((((....	57.5	15	0.208528	1.15551	0.229997	0.882453	9.078	8.86948	441.137	538.485	481.434	375.839	621.167	588.456
tRNA-Ala-TGC-7-1	Ala	Ala-TGC	GCA,GCG	GtRNAdb	chrX:136430364-136430436	-	GGGGATGTAGCTCAGTGGTAGAGCACATGCTTTGCATGTATGGGGTCCTGGGTTCGATTCCCGGCATCTCCACCA	)))))))..)))).......((((.))))).......(((((.....))))).......((((((((((((....	72.9	21.3	0.232434	1.17482	0.158405	0.837061	9.10239	8.86996	433.418	551.42	477.221	420.135	607.997	575.086
mtdbD00002049-Ala-TGC	Ala	Ala-TGC	GCA,GCG	mttRNAdb	chrM	.	GAGGTCTTAGCTTAATTAAAGCAATTGATTTGCATTCAATAGATGTAGGATGAAGTCTTACAGTCCTTACCA	((((.((..((((.....)))).(((((.......)))))....(((((.......))))))).))))....	.	.	0.966799	1.9545	0.0167834	0.55625	13.0677	12.1009	4371.7	4594.32	4741.73	12542.4	5959.57	4855.74
tRNA-Arg-CCT-1-1	Arg	Arg-CCT	AGG	GtRNAdb	chr11:115412980-115413053	+	GCCCCAGTGGCCTAATGGATAAGGCACTGGCCTCCTAAGCCAGGGATTGTGGGTTCGAGTCCCACCTGGGGTACCA	)))))))..))))........((((.))))).......(((((.....))))).......((((((((((((....	72.3	18.3	-0.220545	0.858241	0.332612	0.982022	11.28	11.5005	3559.41	2654.68	2789.01	2529.91	2528.49	2023.7
tRNA-Arg-CCT-2-1	Arg	Arg-CCT	AGG	GtRNAdb	chr11:115413303-115413376	-	GCCCCAGTGGCCTAATGGATAAGGCACTGGCCTCCTAAGCCAGGGATTGTGGGTTCGAGTCCCACCTGGGGTGCCA	)))))))..))))........((((.))))).......(((((.....))))).......((((((((((((....	71.1	18.3	-0.193005	0.874782	0.446744	0.982022	11.4687	11.6617	4140.76	2852.82	3063.74	3069.15	2626.07	2322.72
tRNA-Arg-TCT-1-1	Arg	Arg-TCT	AGA,AGG	GtRNAdb	chr3:122292947-122293032	-	GGCTCCGTGGCGCAATGGATAGCGCATTGGACTTCTAATTCAAAGGTTCCGGGTTCGAGTCCCGGCGGAGTCGCCA	)))))))..))))........((((.))))).......(((((.....))))).......((((((((((((....	71.1	19.9	-0.169726	0.889012	0.282383	0.927055	10.5986	10.7683	1841.68	1777.93	1817.64	1202.61	1602.15	1714.62
tRNA-Arg-TCT-4-1	Arg	Arg-TCT	AGA,AGG	GtRNAdb	chr1:173390328-173390402	+	GTCTCTGTGGCGCAATGGACGAGCGCGCTGGACTTCTAATCCAGAGGTTCTGGGTTCGAGTCCCGGCAGAGATGCCA	)))))))..)))).........((((.))))).......(((((.....))))).......((((((((((((....	75.1	18.5	-0.169601	0.889089	0.444611	0.982022	12.3065	12.4761	6052.73	5918.6	5788.21	3224.92	5255.11	6485.15
tRNA-Arg-TCG-2-1	Arg	Arg-TCG	CGA,CGG	GtRNAdb	chr11:115413778-115413851	+	GACCGCGTGGCCTAATGGATAAGGCGTCTGACTTCGGATCAGAAGATTGAGGGTTCGAGTCCCTTCGTGGTCGCCA	)))))))..))))........((((.))))).......(((((.....))))).......((((((((((((....	68.8	19.9	-0.152709	0.89956	0.503243	0.982022	11.785	11.9377	4909.91	3739.49	3538.6	2581.66	3229.39	4518.65
tRNA-Arg-TCT-3-1	Arg	Arg-TCT	AGA,AGG	GtRNAdb	chr19:12011587-12011673	-	GGCTCTGTGGCGCAATGGATAGCGCATTGGACTTCTAATTCAAAGGTTGTGGGTTCGAGTCCCACCAGAGTCGCCA	)))))))..))))........((((.))))).......(((((.....))))).......((((((((((((....	70.3	20.3	-0.145054	0.904346	0.354722	0.982022	10.4558	10.6008	1561	1616.03	1667.88	1085.54	1416.21	1592.13
tRNA-Arg-TCG-1-1	Arg	Arg-TCG	CGA,CGG	GtRNAdb	chr7:79466418-79466491	+	GGCCGCGTGGCCTAATGGATAAGGCGTCTGACTTCGGATCAGAAGATTGCAGGTTCGAGTCCTGCCGCGGTCGCCA	)))))))..))))........((((.))))).......(((((.....))))).......((((((((((((....	74.8	19.7	-0.127705	0.915286	0.51926	0.982022	11.4744	11.6021	3713.88	2893.06	3059.13	2103.39	2800.3	3419.16
tRNA-Arg-TCT-2-1	Arg	Arg-TCT	AGA,AGG	GtRNAdb	chr11:69123481-69123568	-	GGCTCTGTGGCGCAATGGATAGCGCATTGGACTTCTAATTCAAAGGTTGTGGGTTCGAATCCCACCAGAGTCGCCA	)))))))..))))........((((.))))).......(((((.....))))).......((((((((((((....	70.8	20.2	-0.104227	0.930303	0.5106	0.982022	10.2634	10.3677	1307.1	1420.17	1396.3	905.868	1258.26	1430.09
tRNA-Arg-TCT-5-1	Arg	Arg-TCT	AGA,AGG	GtRNAdb	chr13:21917161-21917247	-	GGCTCTGTGGCGCAATGGATAGCGCATTGGACTTCTAATTCAAAGGTTGCGGGTTCGAGTCCCGCCAGAGTCGCCA	)))))))..))))........((((.))))).......(((((.....))))).......((((((((((((....	70.7	19.8	-0.10103	0.932367	0.524683	0.982022	10.1619	10.263	1269.89	1278.09	1284.09	873.55	1118.47	1349.87
tRNA-Arg-TCG-4-1	Arg	Arg-TCG	CGA,CGG	GtRNAdb	chr13:23526455-23526528	-	GACCACGTGGCCTAACGGATAAGGCGTCTGACTTCGGATCAGAAGATTGAGGGTTCGAATCCCTTCGTGGTTACCA	)))))))..))))........((((.))))).......(((((.....))))).......((((((((((((....	64.3	20.8	-0.0926752	0.937782	0.626517	0.989654	11.015	11.1076	2568.82	2178.75	2119.28	1497.03	2014.69	2549.19
tRNA-Arg-ACG-1-1	Arg	Arg-ACG	CGA,CGC,CGT	GtRNAdb	chr13:23446791-23446864	-	GGGCCAGTGGCGCAATGGATAACGCGTCTGACTACGGATCAGAAGATTCCAGGTTCGACTCCTGGCTGGCTCGCCA	)))))))..)))..........(((.))))).......(((((.....))))).......((((((((((((....	67.6	21.7	-0.0805101	0.945723	0.721494	0.991657	13.7672	13.8477	16617	15062.2	14224.6	10214.7	13501.2	17099.4
tRNA-Arg-ACG-2-1	Arg	Arg-ACG	CGA,CGC,CGT	GtRNAdb	chr3:19627958-19628031	-	GGGCCAGTGGCGCAATGGATAACGCGTCTGACTACGGATCAGAAGATTGTAGGTTCGACTCCTACCTGGCTCGCCA	)))))))..)))..........(((.))))).......(((((.....))))).......((((((((((((....	67.5	21.8	-0.0787573	0.946873	0.711458	0.991657	13.2688	13.3476	10928.8	11139.1	10436.2	7066.25	10190	11685.1
tRNA-Arg-CCT-3-1	Arg	Arg-CCT	AGG	GtRNAdb	chr17:23548767-23548840	-	GCCCCGGTGGCCTAATGGATAAGGCATTGGCCTCCTAAGCCAGGGATTGTGGGTTCGAGTCCCACCCGGGGTACCA	)))))))..))))........((((.))))).......(((((.....))))).......((((((((((((....	71.7	15.4	-0.0722448	0.951157	0.686996	0.991657	11.0254	11.0976	2361.54	2216.33	2250.77	1888.18	2285.92	1828.78
tRNA-Arg-TCG-3-1	Arg	Arg-TCG	CGA,CGG	GtRNAdb	chr13:21279695-21279768	+	GACCACGTGGCCTAATGGATAAGGCGTCTGACTTCGGATCAGAAGATTGAGGGTTCGAATCCCTTCGTGGTTGCCA	)))))))..))))........((((.))))).......(((((.....))))).......((((((((((((....	65.5	20.7	-0.0572809	0.961074	0.780995	0.991657	11.4801	11.5374	3602.14	2842.91	2796.04	2227.46	2574.94	3520.52
tRNA-Arg-CCG-1-1	Arg	Arg-CCG	CGG	GtRNAdb	chr13:21215457-21215530	-	GGCCGCGTGGCCTAATGGATAAGGCGTCTGATTCCGGATCAGAAGATTGAGGGTTCGAGTCCCTTCGTGGTCGCCA	)))))))..))))........((((.))))).......(((((.....))))).......((((((((((((....	67	17.6	-0.0508784	0.965348	0.804207	0.991657	11.442	11.4929	3413.32	2779.17	2771.86	1929.65	2717.59	3525.93
tRNA-Arg-CCG-3-1	Arg	Arg-CCG	CGG	GtRNAdb	chr11:107012865-107012938	+	GACCCAGTGGCCTAATGGATAAGGCATCAGCCTCCGGAGCTGGGGATTGTGGGTTCGAGTCCCATCTGGGTCGCCA	)))))))..))))........((((.))))).......(((((.....))))).......((((((((((((....	64.9	17.7	-0.0178474	0.987705	0.933056	0.998086	13.4996	13.5175	12398.8	12398.6	11761.7	8212.98	13069.9	12705.8
tRNA-Arg-ACG-3-1	Arg	Arg-ACG	CGA,CGC,CGT	GtRNAdb	chr9:123529424-123529497	-	GGGCCAGTGGCGCAATGGATAACGCGTCTGACTACGGATCAGAAGATTCTAGGTTCGACTCCTGGCTGGCTCGCCA	)))))))..)))..........(((.))))).......(((((.....))))).......((((((((((((....	64.2	18.6	-0.00885187	0.993883	0.967206	1	14.0366	14.0455	18301.8	17139.1	17242.4	13389.4	16126	19376.2
tRNA-Arg-CCG-2-1	Arg	Arg-CCG	CGG	GtRNAdb	chr17:23550262-23550335	-	GGCCGCGTGGCCTAATGGATAAGGCGTCTGATTCCGGATCAGAAGATTGGGGGTTCGAGTCCCTTCGTGGTCGCCA	)))))))..))))........((((.))))).......(((((.....))))).......((((((((((((....	64.1	13.9	0.0599639	1.04244	0.744939	0.991657	11.2532	11.1932	2633.33	2267.46	2388.91	1837.5	2341.98	2950.02
tRNA-Arg-CCT-4-1	Arg	Arg-CCT	AGG	GtRNAdb	chr6:38533930-38534003	+	GCCCCAGTGGCCTAATGGATAAGGCATTGGCCTCCTAAGCCAGGGATTGTGGGTTCGAGTCCCATCTGGGGTGCCA	)))))))..))))........((((.))))).......(((((.....))))).......((((((((((((....	65.6	14.1	0.0975708	1.06997	0.657398	0.991657	12.1208	12.0232	4892.58	3964.07	4090.42	4458.15	4037.47	4205.65
mtdbD00002057-Arg-TCG	Arg	Arg-TCG	CGA,CGG	mttRNAdb	chrM	.	TGGTAATTAGTTTAAAAAAAATTAATGATTTCGACTCATTAGATTATGATGATGTTCATAATTACCAACCA	(((((((..((((.....))))((((((.......))))))...(((((......))))))))))))....	.	.	1.0412	2.05793	0.0431716	0.7333	10.7424	9.70124	866.735	750.623	976.3	2596.07	903.386	1134.95
tRNA-Asn-GTT-2-1	Asn	Asn-GTT	AAC,AAT	GtRNAdb	chr3:96322073-96322147	+	GTCTCTGTGGCGCAATTGGTTAGCGCGTTCGGCTGTTAACCGAAAGGTTGGTGGTTCAAGCCCACCCAGGGACGCCA	)))))))..)))).........((((.))))).......(((((.....))))).......((((((((((((....	80.8	25.8	-0.0530369	0.963905	0.747414	0.991657	8.01723	8.07027	258.65	303.579	276.985	201.762	265.935	286.094
tRNA-Asn-GTT-1-1	Asn	Asn-GTT	AAC,AAT	GtRNAdb	chr3:96334614-96334688	-	GTCTCCGTGGCGCAATCGGTCAGCGCGTTCGGCTGTTAACCGAAAGGTTGGTGGTTCGAGCCCACCCGGGGACGCCA	)))))))..)))).........((((.))))).......(((((.....))))).......((((((((((((....	81.6	25.4	-0.0426203	0.97089	0.797387	0.991657	9.59073	9.63335	915.346	798.567	759.609	658.397	751.799	821.164
tRNA-Asn-GTT-3-1	Asn	Asn-GTT	AAC,AAT	GtRNAdb	chr1:171033941-171034015	-	GTCTCTGTGGCGCAATCGGTTAGCGCGTTCGGCTGTTAACCGAAAGGTTGGTGGTTCGAGCCCACCCAGGGACGCCA	)))))))..)))).........((((.))))).......(((((.....))))).......((((((((((((....	80.9	25.7	-0.037883	0.974083	0.87814	0.991657	13.0341	13.072	10735.4	8128.81	7887.42	7096.26	6987.41	10198.7
mtdbD00002050-Asn-GTT	Asn	Asn-GTT	AAC,AAT	mttRNAdb	chrM	.	TAGATTGAAGCCAGTAATAGGGTATTTAGCTGTTAACTAAATTTTCGTAGGTTTAATTCCTGCCAATCTAGCCA	(((((((..(((........)))((((((.......))))))....(((((.......))))))))))))....	.	.	0.653693	1.57319	0.00336019	0.194891	10.6927	10.039	878.389	1158.99	1253.16	1633.99	1860.16	1235.42
tRNA-Asp-GTC-3-1	Asp	Asp-GTC	GAC,GAT	GtRNAdb	chr2:114103366-114103438	+	TCCTCGTTAGTATAGTGGTGAGTATCCCTGCCTGTCACGCAGGACACCAGGGTTCGATTTCCTGACGGGGAGCCA	)))))))..))))........((((.))))).......(((((....))))).......((((((((((((....	52.2	30.1	0.100201	1.07192	0.628114	0.989654	9.4451	9.3449	605.222	606.668	816.483	673.03	564.794	758.037
tRNA-Asp-GTC-4-1	Asp	Asp-GTC	GAC,GAT	GtRNAdb	chr5:100992873-100992945	-	TCCTCGTTAGTATAGTGGTGAGTATCCCCGCCTGTCACACAGGAGACCGGGGTTCGATTCCCCGATGGGGAGCCA	)))))))..))))........((((.)).).........(.((....))))).......((((((((((((....	51.4	17.5	0.118103	1.08531	0.609531	0.982022	12.4187	12.3006	5005.86	4963.51	5768.36	5556.68	4326.77	5706.35
tRNA-Asp-GTC-2-1	Asp	Asp-GTC	GAC,GAT	GtRNAdb	chr10:91182096-91182168	-	TCCTCGTTAGTATAGTGGTTAGTATCCCCGCCTGTCACGCGGGAGACCGGGGTTCAATTCCCCGACGGGGAGCCA	)))))))..))))........((((.))))).......(((((....))))).......((((((((((((....	65.4	30.7	0.163351	1.11989	0.488725	0.982022	11.622	11.4587	3095.01	2639.67	3029.02	3445.04	2461.44	3000.25
tRNA-Asp-GTC-1-1	Asp	Asp-GTC	GAC,GAT	GtRNAdb	chr1:171037028-171037100	-	TCCTCGTTAGTATAGTGGTGAGTATCCCCGCCTGTCACGCGGGAGACCGGGGTTCGATTCCCCGACGGGGAGCCA	)))))))..))))........((((.))))).......(((((....))))).......((((((((((((....	66.5	30.8	0.347192	1.27208	0.292144	0.927055	13.8988	13.5516	14230.2	10862.7	12236.7	19196.8	10212.8	13023.9
mtdbD00002054-Asp-GTC	Asp	Asp-GTC	GAC,GAT	mttRNAdb	chrM	.	AAGATATTAGTAAAATCAATTACATAACTTTGTCAAAGTTAAATTATAGATCAATAATCTATATATCTTACCA	(((((((..((((......)))).(((((.......)))))....(((((.......))))))))))))....	.	.	0.664784	1.58533	0.00463104	0.21488	7.75007	7.08529	133.108	146.893	143.635	168.823	299.527	159.681
tRNA-Cys-GCA-25-1	Cys	Cys-GCA	TGC,TGT	GtRNAdb	chr6:48205067-48205139	+	GGGGGTATAGCTCAGGGGTGGAGCATTTGACTGCAGATCAAGGGGTCCCTGTTTCAAATCCAGGTGCCCCCTCCA	)))))))..)))).......((((.))))).......(((((.....)))).........(((((((((((....	57.3	18.6	-0.357315	0.780616	0.17637	0.837061	7.23055	7.58787	186.525	219.197	195.007	69.5517	198.439	179.991
tRNA-Cys-GCA-18-1	Cys	Cys-GCA	TGC,TGT	GtRNAdb	chr6:48305463-48305535	-	GGGGGTATAGCTCAGAGGAAGAGCATTTGACTGCAGATCAAGAGGTCCCTGATTCAAATCCAGGTGCCCCCTCCA	)))))))..)))).......((((.))))).......(((((.....)))).........(((((((((((....	63.5	19.9	-0.327812	0.796744	0.191676	0.839034	7.78009	8.1079	262.433	326.143	273.392	110.684	296.501	247.702
tRNA-Cys-GCA-21-1	Cys	Cys-GCA	TGC,TGT	GtRNAdb	chr6:48302458-48302530	+	GGGGTTATAGCTCAGGTGTAGAGCATTTGACTGCAGATCAAGAGGTCCCTGGTTCAAATCCAGGTGCCCCCTCCA	)))).))..)))).......((((.))))).......(((((.....))))).......(((((((.((((....	59.6	12	-0.291907	0.816821	0.171247	0.837061	8.16269	8.4546	327.045	415.421	353.858	168.427	362.307	317.037
tRNA-Cys-GCA-16-1	Cys	Cys-GCA	TGC,TGT	GtRNAdb	chr6:48139509-48139581	-	GGGGGTATAACTCAGGGGTAGAGCATTTGACTGCAGATCAAGAGGTCCCTGGTTCAAATCCAGGTGCCCCCTCCA	)))))))...))).......(((..))))).......(((((.....))))).......((((((((((((....	67.5	15.8	-0.286164	0.820079	0.277464	0.927055	8.20813	8.49429	333.996	403.139	389.271	142.042	411.427	330.758
tRNA-Cys-GCA-12-1	Cys	Cys-GCA	TGC,TGT	GtRNAdb	chr6:48253079-48253151	-	GGGGGTATAGCTCAGGGGTAGAGCATTTGACTGCAGATCAAGAGGTCCTTGGTTCAAATCCAGGTGTCCCCTCCA	)))))))..)))).......((((.))))).......(((((.....))))).......((((((((((((....	72.6	16	-0.264933	0.832237	0.174289	0.837061	8.10033	8.36526	289.372	383.758	357.302	176.959	325.689	304.845
tRNA-Cys-GCA-4-1	Cys	Cys-GCA	TGC,TGT	GtRNAdb	chr6:48133936-48134008	+	GGGGGTATAGCTCAGGGGTAGAGCATTTGACTGCAGATCAAGAGGTCCCTGGTTCAAATCCAGGTGCCCCCTCCA	)))))))..)))).......((((.))))).......(((((.....))))).......((((((((((((....	77.2	20.3	-0.254191	0.838457	0.186689	0.837061	8.38574	8.63993	394.416	462.223	389.271	214.249	408.446	362.528
tRNA-Cys-GCA-13-1	Cys	Cys-GCA	TGC,TGT	GtRNAdb	chr6:48356850-48356922	+	GGGGGTATAGCTCAGAGGTAGAGCATTTGACTGCAGATCAAGAGATCTCTGGTTCAAATCCAGGTGCCCCCTCCA	)))))))..)))).......((((.))))).......(((((.....))))).......((((((((((((....	66.7	18.5	-0.251344	0.840113	0.232024	0.882453	8.04269	8.29403	294.892	342.75	342.186	154.585	334.41	290.901
tRNA-Cys-GCA-8-1	Cys	Cys-GCA	TGC,TGT	GtRNAdb	chr6:48224328-48224400	-	GGGGGCATAGCTCAGGGGTAGAGCATTTGACTGCAGATCAAGAGGTCCCCGGTTCAAATCCGGGTGCTCCCTCCA	)))))))..)))).......((((.))))).......(((((.....))))).......((((((((((((....	77.1	20.8	-0.245507	0.84352	0.169302	0.837061	9.19863	9.44414	629.4	770.494	776.237	401.829	714.424	610.04
tRNA-Cys-GCA-10-1	Cys	Cys-GCA	TGC,TGT	GtRNAdb	chr6:48340612-48340684	+	GGGGGTATAGCTCAGGGGTAGAGCATTTGACTGCAGATCAAGAGGTCCCTGGTTCAAATCCAGATGCCCCCTCCA	)))))))..)))).......((((.))))).......(((((......)))).......((((.(((((((....	69.8	17.6	-0.226191	0.854889	0.292141	0.927055	8.25079	8.47698	303.633	433.497	377.277	184.417	379.081	336.552
tRNA-Cys-GCA-14-1	Cys	Cys-GCA	TGC,TGT	GtRNAdb	chr6:48143355-48143427	+	GGGGGTATAGCTCAGGGGTAGAGCATTTGACTGCAGATCAAGAGGTCCCTAGTTCAAATCCAGGTGCCCCCTCCA	)))))))..)))).......((((.))))).......(((((.....))).).......(.((((((((((....	69.4	15.8	-0.22536	0.855382	0.286456	0.927055	8.20212	8.42747	306.853	400.324	368.752	174.077	363.597	333.241
tRNA-Cys-GCA-6-1	Cys	Cys-GCA	TGC,TGT	GtRNAdb	chr6:48293006-48293078	-	GGGGGTATAGCTCAGGGGTAGAGCATTTGACTGCAGATCAAGAGGTCCCTGGTTCAAATCCAGGTACCCCCTCCA	)))))))..)))).......((((.))))).......(((((.....))))).......((((((((((((....	78.7	22.8	-0.202969	0.868761	0.361563	0.982022	8.29421	8.49718	316.617	435.782	377.475	185.999	415.12	328.02
tRNA-Cys-GCA-7-1	Cys	Cys-GCA	TGC,TGT	GtRNAdb	chr6:48209837-48209909	-	GGGGGTATAGCTCAGGGGTAGAGCATTTGACTGCAGATCAAGAGGTCCCCGGTTCAAATCCGGGTGCCCCCTCCA	)))))))..)))).......((((.))))).......(((((.....))))).......((((((((((((....	77.3	20.3	-0.183926	0.880304	0.236873	0.886363	9.91199	10.0959	1122.83	1155.56	1135.4	707.383	1120.47	990.777
tRNA-Cys-GCA-19-1	Cys	Cys-GCA	TGC,TGT	GtRNAdb	chr6:48186317-48186389	+	GGGGGTAAAGCTCAGGGGTAGAGCATTTGACTGCAGATTAAGAGGTCCCTGGTTCAAATCCAGGTACCCCCTCCA	)))))))..)))).......((((.))))).......(((((.....))))).......((((((((((((....	65.2	22.5	-0.173247	0.886845	0.415064	0.982022	6.23819	6.41144	77.7485	97.0309	90.5771	60.2292	94.3252	65.6422
tRNA-Cys-GCA-15-1	Cys	Cys-GCA	TGC,TGT	GtRNAdb	chr6:48308728-48308800	-	GGTGGTATAGCTCAGGGGTAGAGCATTTGACTGCAGATCAAGAGATCCCTGGTTCGAATCCAGGTGCCCCCTCCA	)).))))..)))).......((((.))))).......(((((.....))))).......(((((((((.((....	66.5	10.9	-0.172201	0.887488	0.456404	0.982022	8.05145	8.22365	286.151	337.038	310.267	143.793	355.588	288.8
tRNA-Cys-GCA-17-1	Cys	Cys-GCA	TGC,TGT	GtRNAdb	chr6:48311498-48311570	+	TGGGGTATAGCTCAGGGGTAGAGCATTTGACTGCAGATCAAGAGGTCCCTGGTTCAAATCCAGGTGCCCCCTCCA	.))))))..)))).......((((.))))).......(((((.....))))).......(((((((((((.....	67.8	13.9	-0.169299	0.889274	0.42123	0.982022	8.40522	8.57452	365.126	428.723	396.631	199.898	438.657	364.916
tRNA-Cys-GCA-5-1	Cys	Cys-GCA	TGC,TGT	GtRNAdb	chr11:97769828-97769900	-	GGGGGTATAGCTCAGGGGTAGAGCATTTGACTGCAGATCAAGAGGTCCCTGGTTCAAATCCGGGTGCCCCCTCCA	)))))))..)))).......((((.))))).......(((((.....))))).......((((((((((((....	77.1	19.2	-0.148015	0.902491	0.414967	0.982022	8.88144	9.02945	476.816	585.613	569.905	313.124	559.5	514.537
tRNA-Cys-GCA-24-1	Cys	Cys-GCA	TGC,TGT	GtRNAdb	chr6:48341587-48341659	+	GGGGGTATAGCTCAGGGGTAGAGCATTTGACTGCAGATCACGAGGTCCCTGGTTCAAATCGAGGTGCCCCCTCCA	)))))))..)))).......((((.).))).......(((.(.....))).).......(.((((((((((....	60.7	11.5	-0.102292	0.931552	0.665716	0.991657	7.70027	7.80257	194.601	269.304	234.038	112.548	274.077	230.735
tRNA-Cys-GCA-11-1	Cys	Cys-GCA	TGC,TGT	GtRNAdb	chr6:48288875-48288947	-	GGGGGTATAGCTCAGGGGTAGAGTATTTGGCTGCAGATCAAGAGGTCCCTGGTTCAAATCCAGGTGCCCCCTCCA	)))))))..)))).......((((.))))).......(((((.....))))).......((((((((((((....	68.7	15.3	-0.065348	0.955715	0.806673	0.991657	4.79998	4.86533	25.7628	29.0522	34.8678	18.4756	33.1473	29.1283
tRNA-Cys-GCA-9-1	Cys	Cys-GCA	TGC,TGT	GtRNAdb	chr6:48303464-48303536	+	GGGGGTATAGCTCAGGGGTAGAGCATTTGACTGCAGATTAAGAGGTCCCTGGTTCAAATCCAGGTGCCCCCTCCA	)))))))..)))).......((((.))))).......(((((.....))))).......((((((((((((....	72.8	20	0.0452756	1.03188	0.797995	0.991657	6.72547	6.6802	96.4572	119.31	104.405	89.4963	118.618	99.3228
tRNA-Cys-GCA-3-1	Cys	Cys-GCA	TGC,TGT	GtRNAdb	chr6:47978996-47979068	+	GGGGGTATAGCTCAGTGGTAGAGCATTTGACTGCAGATCAAGAGGTCCCCGGTTCAAATCCGGGTGCCCCCTCCA	)))))))..)))).......((((.))))).......(((((.....))))).......((((((((((((....	81.9	20.3	0.124799	1.09036	0.548273	0.982022	11.6452	11.5204	2859.06	3177.09	3134.96	3338.82	2995.94	2764.04
tRNA-Cys-GCA-2-1	Cys	Cys-GCA	TGC,TGT	GtRNAdb	chr11:97798905-97798977	-	GGGGGTATAGCTCAGTGGTAGAGCATTTGACTGCAGATCAAGAGGTCCCTGGTTCAAATCCGGGTGCCCCCTCCA	)))))))..)))).......((((.))))).......(((((.....))))).......((((((((((((....	81.8	19.3	0.167841	1.12338	0.44397	0.982022	11.3654	11.1976	2290.54	2590.33	2452.2	2871.68	2407.74	2181.86
tRNA-Cys-GCA-1-1	Cys	Cys-GCA	TGC,TGT	GtRNAdb	chr9:104404055-104404127	+	GGGGGTATAGCTCAGTGGTAGAGCATTTGACTGCAGATCAAGAGGTCCCTGGTTCAAATCCAGGTGCCCCCTCCA	)))))))..)))).......((((.))))).......(((((.....))))).......((((((((((((....	81.8	20.3	0.182263	1.13466	0.419163	0.982022	11.2752	11.093	2124.72	2451.28	2245.1	2741.62	2241.74	2013.42
mtdbD00002051-Cys-GCA	Cys	Cys-GCA	TGC,TGT	mttRNAdb	chrM	.	GGTCTTAAGGTGATATTCATGTCGAATTGCAAATTCGAAGGTGTAGAGAAATCTCTACTAAGACTTCCA	(((((((..((((...)))).(((((.......)))))....(((((......))))))))))))....	.	.	0.661771	1.58202	0.18169	0.837061	10.6115	9.94971	1069.16	906.819	1103.58	2345.89	876.157	1017.68
tRNA-Gln-TTG-2-1	Gln	Gln-TTG	CAA,CAG	GtRNAdb	chr13:21268468-21268540	-	GGTCCCATGGTGTAATGGTTAGCACTCTGGACTTTGAATCCAGCAATCTGAGTTCAAATCTCGGTGGGACCTCCA	)))))))..))))........((((.))))).......(((((....))))).......((((((((((((....	65.7	24.2	-0.140067	0.907477	0.478475	0.982022	12.1021	12.2422	4641.55	5775.42	4721.16	3150.11	5064.73	4676.74
tRNA-Gln-TTG-5-1	Gln	Gln-TTG	CAA,CAG	GtRNAdb	chr11:86262167-86262239	+	GGACCCATGGTGTAATGGTTAGCACTCTGGACTTTGAATCCAGCAATCCAAGTTCAAATCTCGGTGGGACCTCCA	)).))))..))))........((((.))))).......(((((....)).)).......((.((((((.((....	51.3	12.7	-0.1258	0.916496	0.518149	0.982022	12.0087	12.1345	4240.49	5442.26	4371.54	3024.12	4696.28	4342.96
tRNA-Gln-TTG-1-1	Gln	Gln-TTG	CAA,CAG	GtRNAdb	chr11:95859171-95859243	-	GGTCCCATGGTGTAATGGTTAGCACTCTGGACTTTGAATCCAGCGATCCGAGTTCAAATCTCGGTGGGACCTCCA	)))))))..))))........((((.))))).......(((((....))))).......((((((((((((....	72.6	26.9	-0.106471	0.928857	0.585001	0.982022	12.3799	12.4864	5543.71	6694.03	5687.57	4032.93	5872.77	5662.61
tRNA-Gln-TTG-3-1	Gln	Gln-TTG	CAA,CAG	GtRNAdb	chr13:23519049-23519121	+	GGCCCCATGGTGTAATGGTTAGCACTCTGGACTTTGAATCCAGCGATCCGAGTTCAAATCTCGGTGGGACCTCCA	)).))))..))))........((((.))))).......(((((....))))).......(((((((((.((....	66.9	19.7	-0.105076	0.929756	0.590959	0.982022	12.3905	12.4956	5626.11	6672.98	5738.25	4028.46	6029.92	5635.3
tRNA-Gln-CTG-2-1	Gln	Gln-CTG	CAG	GtRNAdb	chr9:64738045-64738117	+	GGTTCCATGGTGTAATGGTTAGCACTCTGGACTCTGAATCCAGCGATCCGAGTTCAAATCTCGGTGGAACCTCCA	)))))))..))))........((((.))))).......(((((....))))).......((((((((((((....	71.5	27.5	0.0508363	1.03587	0.821913	0.991657	15.7122	15.6614	50111.5	61145.9	50646.4	48411.9	57095.4	49094.8
tRNA-Gln-TTG-4-1	Gln	Gln-TTG	CAA,CAG	GtRNAdb	chrX:13859165-13859237	-	GGTCTCATGGTGTAATGGTTAGCACACTGGACTTTGAGTCCAGCAATCCGAGTTCGAGTCTTGGTGAGACCACCA	)))))))..))))........((((.))))).......(((((....))))).......((((((((((((....	57.7	22.7	0.151401	1.11065	0.488399	0.982022	5.24936	5.09796	31.1301	31.99	42.4263	40.1716	32.5244	37.2461
tRNA-Gln-CTG-4-1	Gln	Gln-CTG	CAG	GtRNAdb	chr3:97681458-97681530	+	GGTTCCATGGTGTAATGGTGAGCACTCTGGACTCTGAATCCAGCGATCCGAGTTCAAATCTCGGTGGGACCTCCA	)))))))..))))........((((.))))).......(((((....))))).......((((((((((((....	71.1	25.7	0.27588	1.21073	0.224169	0.882453	13.7855	13.5096	11523.1	13357.2	11535.4	12545.9	16378.3	11798.5
mtdbD00002046-Gln-TTG	Gln	Gln-TTG	CAA,CAG	mttRNAdb	chrM	.	TAGGATAAGGTGTTTAGGTAGCACGGAGAATTTTGAATTCTTAAGTGTAGGTTCAATTCCTATTGTCCTAGCCA	(((((((..((((.......)))).(((((.......)))))....(((((.......))))))))))))....	.	.	0.365336	1.28818	0.283198	0.927055	13.0493	12.684	6045.67	6948.04	7565.95	11103.6	5253.2	7065.29
tRNA-Gln-CTG-3-1	Gln	Gln-CTG	CAG	GtRNAdb	chr3:96341155-96341227	-	GGTTCCATGGTGTAATGGTTAGCACTCTGGACTCTGAATCCAGCGATCCGAGTTCAAATCTCGGTGGGACCTCCA	)))))))..))))........((((.))))).......(((((....))))).......((((((((((((....	71.1	25.7	0.427727	1.34511	0.121086	0.837061	14.6688	14.2411	18995.2	21996.4	19476.4	29179.3	24989.8	19223.4
tRNA-Gln-CTG-5-1	Gln	Gln-CTG	CAG	GtRNAdb	chr13:21996580-21996652	-	GGTTCCATGGTGTAATGGCTAGCACTCTGGACTCTGAATCCAGCGATCCGAGTTCAAATCTCGGTGGGATTTCCA	)))))))..))))........((((.))))).......(((((....))))).......((((((((((((....	60.3	24.1	0.432738	1.34979	0.0795641	0.837061	13.5693	13.1366	8791.56	10122.9	9206.95	11987.8	13645.6	9086.35
tRNA-Gln-CTG-1-1	Gln	Gln-CTG	CAG	GtRNAdb	chr13:21920199-21920271	+	GGTTCCATGGTGTAATGGTTAGCACTCTGGACTCTGAATCCAGCGACCCGAGTTCAAATCTCGGTGGGACCTCCA	)))))))..))))........((((.))))).......(((((....))))).......((((((((((((....	73.6	25.8	0.485691	1.40026	0.0865825	0.837061	14.1342	13.6485	13073.4	14430.6	12568.7	20652.8	16904.9	12962.4
tRNA-Glu-TTC-2-1	Glu	Glu-TTC	GAA,GAG	GtRNAdb	chr1:34434811-34434883	-	TCCCATATGGTCTAGCGGTTAGGATTCCTGGTTTTCACCCAGGCGGCCCGGGTTCGACTCCCGGTATGGGAACCA	)))))))..))))........((((.))))).......(((((....))))).......((((((((((((....	70.4	25	0.0324779	1.02277	0.889136	0.991657	14.0274	13.9949	17262.8	16282.7	17338	14583	13698.4	19928.6
tRNA-Glu-TTC-1-1	Glu	Glu-TTC	GAA,GAG	GtRNAdb	chr7:58399314-58399386	+	TCCCACATGGTCTAGCGGTTAGGATTCCTGGTTTTCACCCAGGCGGCCCGGGTTCGACTCCCGGTGTGGGAACCA	)))))))..))))........((((.))))).......(((((....))))).......((((((((((((....	71.2	24.7	0.0582283	1.04119	0.804012	0.991657	13.4153	13.3571	11508.5	10433.7	10740	10396.3	8805.48	12098.7
tRNA-Glu-CTC-2-1	Glu	Glu-CTC	GAG	GtRNAdb	chr17:56092000-56092072	-	TCCCTGGTGGTCTAGTGGTTAGGATTTGGCGCTCTCACCGCCGCGGCCTGGGTTCGATTCCCGGTCAGGGAACCA	)))))))..))))........((((.))))).......(((((....))))).......((((((((((((....	67.9	18.7	0.0936167	1.06704	0.5624	0.982022	9.20165	9.10803	528.751	544.606	647.372	498.897	604.438	602.081
tRNA-Glu-CTC-1-1	Glu	Glu-CTC	GAG	GtRNAdb	chr1:171064163-171064235	-	TCCCTGGTGGTCTAGTGGTTAGGATTCGGCGCTCTCACCGCCGCGGCCCGGGTTCGATTCCCGGTCAGGGAACCA	)))))))..))))........((((.))))).......(((((....))))).......((((((((((((....	73.2	24.2	0.297599	1.2291	0.212977	0.882453	15.5038	15.2062	40726.8	38428.9	38639.9	46963	42046.8	43343.5
tRNA-Glu-TTC-3-1	Glu	Glu-TTC	GAA,GAG	GtRNAdb	chr3:96346674-96346746	+	TCCCTGGTGGTCTAGTGGCTAGGATTCGGCGCTTTCACCGCCGCGGCCCGGGTTCGATTCCCGGTCAGGGAACCA	)))))))..))))........((((.))))).......(((((....))))).......((((((((((((....	68.7	24.2	0.384212	1.30515	0.12951	0.837061	12.1063	11.722	4181.19	2677.12	3630.07	4516.23	3604.02	4422.64
mtdbD00002061-Glu-TTC	Glu	Glu-TTC	GAA,GAG	mttRNAdb	chrM	.	GTTTCTGTAGTTGAATTACAACGATGATTTTTCATGTCATTGGTCGCAGTTGAATGCTGTGTAGAAATACCA	(((((((..((((.....))))((((((.......))))))...(((((.......))))))))))))....	.	.	0.671511	1.59274	0.00675845	0.261327	15.1388	14.4673	21610.7	22430.1	26668.8	35538.2	38616	28896.1
tRNA-Gly-CCC-3-1	Gly	Gly-CCC	GGG	GtRNAdb	chr3:96424032-96424103	-	GCATTGGTGGTTCAATGGTAGAATTCTCGCCTCCCACGCGGGTGACCCGGGTTCGATTCCCGGCCAATGCACCA	)))))))..)))).......((((.))))).......(((((....))))).......((((((((((((....	75.9	21.8	-0.114456	0.92373	0.607962	0.982022	13.768	13.8824	14900.4	16275.7	15962.9	9210.27	16094.5	15826.2
tRNA-Gly-CCC-1-1	Gly	Gly-CCC	GGG	GtRNAdb	chr6:86403892-86403963	+	GCGCCGCTGGTGTAGTGGTATCATGCAAGATTCCCATTCTTGCGACCCGGGTTCGATTCCCGGGCGGCGCACCA	)))))))..))).........(((.))))).......(((((....))))).......((((((((((((....	75.1	29.1	-0.04608	0.968564	0.858251	0.991657	10.6858	10.7319	2100.44	1457.42	1724.71	1777.16	1700.7	1186.14
tRNA-Gly-CCC-4-1	Gly	Gly-CCC	GGG	GtRNAdb	chr4:32230249-32230320	+	GCATTGGTGGTTCAATGGTAGAATTCTCGCCTCCCACTCGGGTGACCCGGGTTCGATTCCCGGCCAATGCACCA	)))))))..)))).......((((.)))).........((((....))))).......((((((((((((....	68.3	12.9	-0.0330652	0.977342	0.888399	0.991657	12.5719	12.605	6726.96	6074.47	6606.43	3592.57	7192.07	7287.78
tRNA-Gly-CCC-2-1	Gly	Gly-CCC	GGG	GtRNAdb	chr3:96351166-96351237	-	GCATTGGTAGTTCAATGGTAGAATTCTCGCCTCCCACGCGGGTGACCCGGGTTCGATTCCCGGCCAATGCACCA	)))))))..)))).......((((.))))).......(((((....))))).......((((((((((((....	75.6	21.8	-0.0104453	0.992786	0.959193	1	11.9441	11.9545	3897.24	4304.86	4187.56	3803.71	4058.16	3416.9
tRNA-Gly-TCC-1-1	Gly	Gly-TCC	GGA,GGG	GtRNAdb	chr1:171037996-171038068	-	GCGTTGGTGGTATAGTGGTGAGCATAGCTGCCTTCCAAGCAGTTGACCCGGGTTCGATTCCCGGCCAACGCACCA	)))))))..)).)........(.((.))))).......(((((....))))).......((((((((((((....	73.8	24.5	0.0481006	1.0339	0.765103	0.991657	10.9625	10.9144	1820.42	2108.24	2099.33	1724.39	1969.71	2074.32
tRNA-Gly-ACC-1-1	Gly	Gly-ACC	GGA,GGC,GGT	GtRNAdb	chr11:48823727-48823801	+	GTTTCCGTAGTGTAGTGGTTAGCGCGTTCGCCTACCAAAGCGAAAGGTCCCCGGTTCGAAACCGGGCGGAAACACCA	)))))))..))))........((((.)))))........(((((.....))))).......((((((((((((....	70.7	21.2	0.185662	1.13734	0.228228	0.882453	9.95048	9.76481	858.965	886.621	968.171	876.262	1001.72	977.884
tRNA-Gly-GCC-1-1	Gly	Gly-GCC	GGC,GGT	GtRNAdb	chr1:171066630-171066701	+	GCATGGGTGGTTCAGTGGTAGAATTCTCGCCTGCCACGCGGGAGGCCCGGGTTCGATTCCCGGCCCATGCACCA	)))))))..)))).......((((.))))).......(((((....))))).......((((((((((((....	80.9	20.8	0.325513	1.25311	0.402326	0.982022	13.693	13.3675	12624	9468.88	10757.9	18756	8711.69	8726.09
tRNA-Gly-GCC-4-1	Gly	Gly-GCC	GGC,GGT	GtRNAdb	chr8:111062560-111062631	+	GCATTGGTGGTTCAGTGGTAGAATTCTCGCCTGCCACGCGGGAGGCCCGGGTTCGGTTCCCGGCCAATGCACCA	)))))))..)))).......((((.))))).......(((((....))))).......((((((((((((....	72.7	21.1	0.355115	1.27909	0.307686	0.927055	14.3779	14.0227	19712.7	14266.6	17754.8	27550.5	13931.9	17436
tRNA-Gly-GCC-2-1	Gly	Gly-GCC	GGC,GGT	GtRNAdb	chr1:171044984-171045055	+	GCATTGGTGGTTCAGTGGTAGAATTCTCGCCTGCCACGCGGGAGGCCCGGGTTCGATTCCCGGCCAATGCACCA	)))))))..)))).......((((.))))).......(((((....))))).......((((((((((((....	81	21.1	0.358151	1.28178	0.305532	0.927055	14.4457	14.0875	20650.2	14959.5	18499.3	28982.6	14646.6	18094.7
tRNA-Gly-GCC-3-1	Gly	Gly-GCC	GGC,GGT	GtRNAdb	chr1:74816746-74816817	-	GCATTGGTGGTTCAGTGGTAGAATTCTCGCCTGCCACGCGGGAGGCCCGGGTTTGATTCCCGGCCAATGCACCA	)))))))..)))).......((((.))))).......(((((....))))).......((((((((((((....	75.4	21.1	0.361194	1.28449	0.301128	0.927055	14.3819	14.0207	19604.1	14313.7	17747.1	27694.2	13825.2	17543.5
mtdbD00002056-Gly-TCC	Gly	Gly-TCC	GGA,GGG	mttRNAdb	chrM	.	ACTCCCTTAGTATAATTAATATAACTGACTTCCAATTAGTAGATTCTGAATAAACCCAGAAGAGAGTACCA	((((.((..((((.....)))).(((((.......)))))....((((........)))))).))))....	.	.	0.411209	1.3298	0.147638	0.837061	14.0658	13.6546	12155.1	13112.2	15000.5	20046.5	14376.8	13653.8
tRNA-His-GTG-3-1	His	His-GTG	CAC,CAT	GtRNAdb	chr3:96435971-96436043	+	GCCGTGATCGTATAGGGGTTAGTACTCTGCGTTGTGGCCGCAGCAACCTCGGTTCGAATCCGAGTCACGGCACCA	)))))))..))))........((((.))))).......(((((....))))).......((((((((((((....	55.5	30.3	-0.11535	0.923158	0.570597	0.982022	12.5383	12.6536	7203.98	6495.6	6365.33	4611.66	5894.79	6834.81
mtdbD00002058-His-GTG	His	His-GTG	CAC,CAT	mttRNAdb	chrM	.	GTGAATATAGTTTACAAAAAACATTAGACTGTGAATCTGACAACAGGAAATAAACCTCCTTATTCACCCCA	(((((((..((((.....)))).(((((.......)))))....((((........)))))))))))....	.	.	0.327196	1.25457	0.251737	0.898509	14.6603	14.3331	19271.2	23619.9	21608.3	30054.8	23216	19386.3
tRNA-His-GTG-2-1	His	His-GTG	CAC,CAT	GtRNAdb	chr2:122375493-122375565	-	GCCGTGATCGTATAGTGGTTAGTACTCTGCGTTGTGGCCGCAGCAACCTCGGTTCGAATCCGAGTCACGGCACCA	)))))))..))))........((((.))))).......(((((....))))).......((((((((((((....	60.1	30.3	0.407879	1.32673	0.250819	0.898509	15.4573	15.0494	36922.3	35331.7	33401.2	60569.9	29755.3	33509.5
tRNA-His-GTG-1-1	His	His-GTG	CAC,CAT	GtRNAdb	chr3:96463971-96464043	-	GCCGAGATCGTATAGTGGTTAGTACTCTGCATTGTGGCTGCAGCAACCTCGGTTCGAATCCGAGTCTCGGCACCA	)))))))..))))........((((.))))).......(((((....))))).......((((((((((((....	60.3	29.4	0.543898	1.45791	0.136287	0.837061	13.0009	12.457	5931.48	5834.59	5761.72	11418.5	5225.62	5812.55
mtdbD00002045-Ile-GAT	Ile	Ile-GAT	ATA,ATC,ATT	mttRNAdb	chrM	.	AGAAATATGTCTGATAAAAGAATTACTTTGATAGAGTAAATTATAGAGGTTCAAGCCCTCTTATTTCTACCA	(((((((..(((......))).(((((.......))))).....(((((.......))))))))))))....	.	.	-0.179812	0.882818	0.385923	0.982022	12.8337	13.0135	7609.23	9206.27	9026.09	5390.12	8371.27	7600.11
tRNA-Ile-AAT-3-1	Ile	Ile-AAT	ATA,ATC,ATT	GtRNAdb	chr13:23397059-23397133	+	GGCCGGTTAGCTCAGTTGGTTAGAGTGTGGTGCTAATAACGCCAAGGTCGCGGGTTCGATCCCCGTACGGGCCACCA	)))).))..)))).........((((.))))).......(((((.....))))).......(((((((.((((....	78.5	16.2	-0.116319	0.922538	0.538886	0.982022	10.9307	11.047	2088.78	2344.29	2172.39	1239.95	2355.06	2171.41
tRNA-Ile-AAT-1-1	Ile	Ile-AAT	ATA,ATC,ATT	GtRNAdb	chr11:69037002-69037076	+	GGCCGGTTAGCTCAGTTGGTTAGAGCGTGGTGCTAATAACGCCAAGGTCGCGGGTTCGATCCCCGTACGGGCCACCA	)))).))..)))).........((((.))))).......(((((.....))))).......(((((((.((((....	81.2	16.4	-0.0957826	0.935764	0.607053	0.982022	10.9991	11.0948	2160.34	2413.33	2254.07	1317.81	2437.82	2285.57
tRNA-Ile-TAT-2-1	Ile	Ile-TAT	ATA	GtRNAdb	chr13:21896937-21897031	-	GCTCCAGTGGCGCAATCGGTTAGCGCGCGGTACTTATAATGCCGAGGTTGTGAGTTCGAGCCTCACCTGGAGCACCA	)))))))..)))).........((((.))))).......(((((.....))))).......((((((((((((....	73.1	28.1	-0.00358815	0.997516	0.980458	1	9.78105	9.78463	923.167	937.422	890.258	613.592	1061.16	907.913
tRNA-Ile-TAT-1-1	Ile	Ile-TAT	ATA	GtRNAdb	chr7:28372998-28373093	+	GCTCCAGTGGCGCAATCGGTTAGCGCGCGGTACTTATAATGCCGAGGTTGTGAGTTCGATCCTCACCTGGAGCACCA	)))))))..)))).........((((.))))).......(((((.....))))).......((((((((((((....	73.7	28.2	0.0592897	1.04195	0.692397	0.991657	10.2768	10.2175	1187.24	1285.07	1243.5	989.884	1350.01	1269.1
tRNA-Ile-AAT-2-1	Ile	Ile-AAT	ATA,ATC,ATT	GtRNAdb	chr4:27904778-27904852	+	GGCCGGTTAGCTCAGTTGGTTAGAGCATGGTGCTAATAACGCCAAGGTCACGGGTTCGATCCCCGTATGGGCCACCA	)))).))..)))).........((((.))))).......(((((.....))))).......(((((((.((((....	80.3	19	0.186014	1.13762	0.478775	0.982022	4.92471	4.73869	28.0119	27.4608	27.8051	19.3796	35.7279	32.8211
tRNA-Ile-AAT-4-1	Ile	Ile-AAT	ATA,ATC,ATT	GtRNAdb	chr16:75434178-75434252	+	GGCCGGTTAGCTCAGTTGGTTAGAGCATGGTGCTAATAACGCCAAGGTTGTGGGTTCGATGCCCGTATGGGCCACCA	)))).))..)))).........((((.))))).......(((((.....))))).......(((((((.((((....	66.9	12.3	0.232427	1.17481	0.36324	0.982022	4.38976	4.15734	18.7087	17.1783	19.4784	18.3626	20.7782	21.6791
tRNA-iMet-CAT-1-1	iMet	iMet-CAT	ATG	GtRNAdb	chr3:90475859-90475931	-	AGCAGAGTGGCGCAGCGGAAGCGTGCTGGGCCCATAACCCAGAGGTCGATGGATCGAAACCATCCTCTGCTACCA	)))))))..)))).......((((.))))).......(((((.....))))).......((((((((((((....	60.4	29.6	0.0269084	1.01883	0.884278	0.991657	10.9619	10.935	1975.76	2078.37	2054.2	1366.63	2507	1992.25
tRNA-iMet-CAT-2-1	iMet	iMet-CAT	ATG	GtRNAdb	chr15:69396622-69396694	-	AGCAGAGTGGCGCAGCGGAAGCATGCTGGGCCCATAACCCAGAGGTCGATGGATCGAAACCATCCTCTGCTACCA	)))))))..).)).......((.(.))))).......(((((.....))))).......((((((((((((....	53.1	23.9	0.0306239	1.02145	0.867132	0.991657	10.5035	10.4729	1447.32	1522.63	1463.9	988.641	1834.54	1446.93
tRNA-iMet-CAT-3-1	iMet	iMet-CAT	ATG	GtRNAdb	chr13:21907110-21907182	+	AGCAGAGTGGCGCAGCGGAAGCGTGCTGGGCCCATAACCCAGAGGTCGATAGATCGAAACCATCCTCTGCTACCA	)))))))..)))).......((((.))))).......(((((.....))).).......(.((((((((((....	52.6	25	0.0618981	1.04384	0.724551	0.991657	10.0954	10.0335	1036.95	1151.97	1082.66	749.306	1370.83	1096.05
mtdbD00002044-Leu-TAA	Leu	Leu-TAA	TTA,TTG	mttRNAdb	chrM	.	ATTAGGGTGGCAGAGCCAGGAAATTGCGTAAGACTTAAAACCTTGTTCCCAGAGGTTCAAATCCTCTCCCTAATACCA	(((((((..((((..........))))(((((.........)))))....(((((.......))))))))))))....	.	.	-0.147559	0.902777	0.427131	0.982022	10.6367	10.7842	1596.07	1865.54	2048.06	1058.36	1921.56	1709.88
tRNA-Leu-TAG-3-1	Leu	Leu-TAG	CTA,CTG	GtRNAdb	chr7:120835478-120835560	-	GGTAGCGTGGCCGAGTGGTCTAAGGCGCTGGATTTAGGCTCCAGTCATTTCGATGGCGTGGGTTCGAATCCCACCGCTGCCACCA	)))))))..)))...........(((.))))).......(((((..))....((...))))).......((((((((((((....	73.9	16.8	-0.136497	0.909725	0.439159	0.982022	11.1723	11.3088	2359.8	2836.54	2729.93	1613.25	2687.78	2476
tRNA-Leu-AAG-2-1	Leu	Leu-AAG	CTA,CTC,CTT	GtRNAdb	chr7:120917516-120917598	+	GGTAGTGTGGCCGAGCGGTCTAAGGCGCTGGATTAAGGCTCCAGTCTCTTCGGGGGCGTGGGTTCGAATCCCACCGCTGCCACCA	)))))))..)))...........(((.))))).......(((((.)))...(((...))))).......((((((((((((....	72.5	17.5	-0.129623	0.91407	0.465353	0.982022	11.0449	11.1745	2170.31	2524.89	2524.59	1442.22	2456.59	2314.64
tRNA-Leu-CAG-4-1	Leu	Leu-CAG	CTG	GtRNAdb	chr3:24163024-24163107	-	GTCAGGATGGCCGAGCAGTCTAAGGCACTGCGTTCAGGTCGCAGTCTCCCCTGGAGGCGTGGATTCGAATCCCACTCCTGACACCA	)))))))..)))...........(((.))))).......(((((.))))...((((..)))).........(((((((((((....	60.3	29.9	-0.12838	0.914858	0.569151	0.982022	8.92614	9.05452	509.276	601.118	550.253	264.308	634.337	548.6
mtdbD00002060-Leu-TAG	Leu	Leu-TAG	CTA,CTG	mttRNAdb	chrM	.	ACTTTTATAGGATAATAGTAATCCATTGGTCTTAGGAACCAAAAACCTTGGTGCAAATCCAAATAAAAGTACCA	(((((((..((((.......)))).(((((.......))))).....((((.......)))).)))))))....	.	.	-0.128099	0.915036	0.474752	0.982022	11.0587	11.1868	2103.35	2575.52	2606.84	1532.29	2568.14	2152.63
tRNA-Leu-AAG-3-1	Leu	Leu-AAG	CTA,CTC,CTT	GtRNAdb	chr13:21170205-21170287	+	GGTAGTGTGGCCGAGCGGTCTAAGGCGCTGGATTAAGGCTCCAGTCTCTTCGGGGGCGTGGGTTCGAATCCCACCACTGCCACCA	)))))))..)))...........(((.))))).......(((((.)))...(((...))))).......((((((((((((....	74.1	20.1	-0.112332	0.925092	0.506107	0.982022	11.288	11.4003	2534.16	2989.15	2920.7	1857.39	2826.86	2628.43
tRNA-Leu-TAG-2-1	Leu	Leu-TAG	CTA,CTG	GtRNAdb	chr14:51082829-51082911	-	GGTAGTGTGGCCGAGCGGTCTAAGGCGCTGGATTTAGGCTCCAGTCTCTTCGGAGGCGTGGGTTCGAATCCCACCACTGCCACCA	)))))))..)))...........(((.))))).......(((((.)))....(((..))))).......((((((((((((....	74.5	22.1	-0.109158	0.927129	0.547227	0.982022	10.9434	11.0526	1985.78	2296.83	2351.98	1307.47	2230.52	2263.06
tRNA-Leu-TAA-1-1	Leu	Leu-TAA	TTA,TTG	GtRNAdb	chr19:12011085-12011168	-	ACCAGAATGGCCGAGTGGTTAAGGCGTTGGACTTAAGATCCAATGGATTTATATCCGCGTGGGTTCGAACCCCACTTCTGGTACCA	)))))))..)))..........(((.))))).......(((((.))))....((((..))))).......((((((((((((....	86.4	31.4	-0.106585	0.928784	0.579737	0.982022	8.87868	8.98527	482.542	559.336	540.563	295.214	588.954	505.209
tRNA-Leu-CAG-3-1	Leu	Leu-CAG	CTG	GtRNAdb	chr8:38213200-38213283	+	GTCAGGATGGCCGAGTGGTCTAAGGAGCTGTGTTCAGGTCGCAGTCTCCCCTGGAGGCGTGGGTTCGAATCCCACTCCTGACACCA	)))))))...))...........((..))))).......(((((.))))...((((..))))).......((((((((((((....	70.6	27	-0.102324	0.931531	0.631331	0.989654	9.58136	9.68368	821.138	900.739	844.858	435.73	1015.11	824.984
tRNA-Leu-AAG-1-1	Leu	Leu-AAG	CTA,CTC,CTT	GtRNAdb	chr11:48856973-48857055	-	GGTAGCGTGGCCGAGCGGTCTAAGGCGCTGGATTAAGGCTCCAGTCTCTTCGGGGGCGTGGGTTCGAATCCCACCGCTGCCACCA	)))))))..)))...........(((.))))).......(((((.)))...(((...))))).......((((((((((((....	74.8	19.7	-0.100969	0.932406	0.605961	0.982022	11.7142	11.8152	3398.6	3858.92	3997.06	2277.69	3468.19	4140.11
tRNA-Leu-TAG-1-1	Leu	Leu-TAG	CTA,CTG	GtRNAdb	chr11:69124240-69124322	+	GGTAGCGTGGCCGAGCGGTCTAAGGCGCTGGATTTAGGCTCCAGTCTCTTCGGAGGCGTGGGTTCGAATCCCACCGCTGCCACCA	)))))))..)))...........(((.))))).......(((((.)))....(((..))))).......((((((((((((....	75.2	21.7	-0.0771662	0.947918	0.698705	0.991657	11.801	11.8781	3527.41	4016.87	4213.04	2403.74	3684.2	4415.19
tRNA-Leu-CAG-1-1	Leu	Leu-CAG	CTG	GtRNAdb	chr1:171065983-171066066	+	GTCAGGATGGCCGAGCGGTCTAAGGCGCTGCGTTCAGGTCGCAGTCTCCCCTGGAGGCGTGGGTTCGAATCCCACTCCTGACACCA	)))))))..)))...........(((.))))).......(((((.))))...((((..))))).......((((((((((((....	78.2	30.7	-0.0640444	0.956579	0.712136	0.991657	10.7439	10.808	1741.6	1920.34	1934.58	1165.09	2021.27	1858.13
tRNA-Leu-CAG-2-1	Leu	Leu-CAG	CTG	GtRNAdb	chr1:171038613-171038696	+	GTCAGGATGGCCGAGCGGTCTAAGGCGCTGCGTTCAGGTCGCAGTCTCCCCTGGAGGCGTGGGTTCGAATCCCACTTCTGACACCA	)))))))..)))...........(((.))))).......(((((.))))...((((..))))).......((((((((((((....	77.3	29.8	-0.0225963	0.984459	0.899805	0.991657	11.3431	11.3657	2547.14	2790.39	2900.75	1768.12	3055.87	2818.6
tRNA-Leu-CAA-1-1	Leu	Leu-CAA	TTG	GtRNAdb	chr13:21172836-21172942	-	GTCAGGATGGCCGAGTGGTCTAAGGCGCCAGACTCAAGTTCTGGTCTCCCCTGGAGGCGTGGGTTCGAATCCCACTTCTGACACCA	)))))))..)))...........(((.))))).......(((((.))))...((((..))))).......((((((((((((....	77.7	23.3	0.0321498	1.02253	0.855037	0.991657	10.2071	10.175	1103.4	1213.91	1291.45	796.766	1420.48	1260.86
tRNA-Leu-CAA-4-1	Leu	Leu-CAA	TTG	GtRNAdb	chr13:21914837-21914943	+	GTCAGGATGGCCGAGTGGTCTAAGGCGCCAGACTCAAGTTCTGGTCTCCGTGTGGAGGCGTGGGTTCGAATCCCACTTCTGACACCA	)))))))..)))...........(((.))))).......(((((.))))....((((..))))).......((((((((((((....	75.1	24.3	0.104176	1.07488	0.498038	0.982022	9.93843	9.83425	909.212	919.346	1018.53	741.17	1061.69	1061.8
tRNA-Leu-TAA-3-1	Leu	Leu-TAA	TTA,TTG	GtRNAdb	chr13:21848021-21848104	-	ACTGGGATGGCTGAGTGGTTAAGGCGTTGGACTTAAGATCCAATGGGCGGTTGCCTGCGTGGGTTCGAACCCCACTCCCAGTACCA	)))))))..)))..........(((.))))).......(((((.))))....((((..))))).......((((((((((((....	79	20	0.121072	1.08754	0.663354	0.991657	5.20174	5.08066	33.3281	37.3761	34.8183	21.7526	42.7578	42.1167
tRNA-Leu-TAA-2-1	Leu	Leu-TAA	TTA,TTG	GtRNAdb	chr10:12922570-12922653	-	ACCAGGATGGCCGAGTGGTTAAGGCGTTGGACTTAAGATCCAATGGACATATGTCTGCGTGGGTTCGAACCCCACTCCTGGTACCA	)))))))..)))..........(((.))))).......(((((.))))....((((..))))).......((((((((((((....	84	26.6	0.123372	1.08928	0.600034	0.982022	12.6677	12.5443	5753.03	6533.67	6366.54	4285.94	8895.98	6009.03
tRNA-Leu-CAA-3-1	Leu	Leu-CAA	TTG	GtRNAdb	chr11:58302473-58302580	-	GTCAGGATGGCCGAGTGGTCTAAGGCGCCAGACTCAAGTTCTGGTCTCCGAATGGAGGCGTGGGTTCGAATCCCACTTCTGACACCA	)))))))..)))...........(((.))))).......(((((.))))....((((..))))).......((((((((((((....	75.6	23.2	0.124008	1.08976	0.445074	0.982022	10.9756	10.8516	1754.68	1940.09	2074.25	1561.33	2258.82	2050.57
tRNA-Leu-CAA-2-1	Leu	Leu-CAA	TTG	GtRNAdb	chr13:21200203-21200308	+	GTCAGGATGGCCGAGTGGTCTAAGGCGCCAGACTCAAGTTCTGGTCTCCGTATGGAGGCGTGGGTTCGAATCCCACTTCTGACACCA	)))))))..)))...........(((.))))).......(((((.))))....((((..))))).......((((((((((((....	78.1	26.6	0.245268	1.18531	0.124885	0.837061	10.4146	10.1693	1110	1182.69	1300.77	1192.66	1469.87	1281.04
tRNA-Lys-CTT-1-1	Lys	Lys-CTT	AAG	GtRNAdb	chrX:136195731-136195804	-	GCCCAGCTAGCTCAGTTGGTAGAGCGTGGGACTCTTAATCCTAGGGTCGTGGGTTCGAACCCCACGTTGGGCGCCA	)))))))..))))........((((.))))).......(((((.....))))).......((((((((((((....	86.4	16.2	-0.208787	0.865265	0.412208	0.982022	6.35231	6.56109	120.482	86.1364	87.9007	87.0668	77.7293	69.3987
tRNA-Lys-TTT-5-1	Lys	Lys-TTT	AAA,AAG	GtRNAdb	chr10:87829885-87829958	-	ACCTGGATAGCTCAGTTGGTAGAGCATCAGACTTTTAATCTGAGGCTCCAGGGTTCAAGTCCCTGTTCGAGCCCCA	.).))))..))))........((((.))))).......(((((.....))))).......(((((((((.(.....	63.3	11.4	-0.150015	0.901241	0.428934	0.982022	6.95336	7.10338	147.114	134.366	147.079	105.994	141.799	112.088
tRNA-Lys-CTT-7-1	Lys	Lys-CTT	AAG	GtRNAdb	chr1:110904746-110904819	-	GCCTGGCTAGCTCAGTCCATAGAGCATGGGACTCTTAATCCCAGGGTCATGGGTTCGAGCCCCATATTAGGCACCA	))))))...))))........((((.))))).......(((((.....))))).......(((((.((((((....	67.6	19.5	-0.120593	0.91981	0.664947	0.991657	5.27497	5.39557	41.6601	39.9467	48.8447	39.0981	40.3552	33.2668
tRNA-Lys-CTT-6-1	Lys	Lys-CTT	AAG	GtRNAdb	chr9:14958432-14958505	-	GTCCTGCTGGCTCAGTCGGTACAGCATGGGACTCTTAATCCCAGGGTCGTGGGTTCGAGCTCCACGTTGGGTACCA	)))).))..)))..........(((.))))).......(((((.....))))).......(((((((.((((....	61	10.4	-0.0449928	0.969295	0.888296	0.991657	6.5538	6.5988	106.016	86.5852	108.99	104.638	87.8737	75.7655
mtdbD00002055-Lys-TTT	Lys	Lys-TTT	AAA,AAG	mttRNAdb	chrM	.	CACTATGAAGCTAAGAGCGTTAACCTTTTAAGTTAAAGTTAGAGACCTTAAAATCTCCATAGTGACCA	(((((((..(((...))).(((((.......))))).....((((........)))))))))))....	.	.	0.0201582	1.01407	0.909101	0.991657	10.0054	9.98522	964.265	923.467	1273.09	951.915	980.804	1021.88
tRNA-Lys-TTT-3-1	Lys	Lys-TTT	AAA,AAG	GtRNAdb	chr13:21971787-21971860	+	GCCTGGATAGCTCAATTGGTAGAGCATCAGACTTTTAATCTGAGGGTTCAGGGTTCAAGTCCCTGTTCAGGCGCCA	)))))))..))))........((((.))))).......(((((.....))))).......((((((((((((....	82.7	21.1	0.046235	1.03257	0.780612	0.991657	6.93347	6.88724	104.687	120.656	142.594	107.689	127.828	118.487
tRNA-Lys-TTT-1-1	Lys	Lys-TTT	AAA,AAG	GtRNAdb	chr1:133033961-133034034	+	GCCCGGATAGCTCAGTCGGTAGAGCATCAGACTTTTAATCTGAGGGTCCAGGGTTCAAGTCCCTGTTCGGGCGCCA	)))))))..))))........((((.))))).......(((((.....))))).......((((((((((((....	87.8	20.5	0.0484352	1.03414	0.824733	0.991657	12.8915	12.843	7864.92	7113.25	7913.44	7142.92	6690.64	7963.21
tRNA-Lys-TTT-2-1	Lys	Lys-TTT	AAA,AAG	GtRNAdb	chr7:28793987-28794060	-	GCCTGGATAGCTCAGTCGGTAGAGCATCAGACTTTTAATCTGAGGGTCCAGGGTTCAAGTCCCTGTTCAGGCGCCA	)))))))..))))........((((.))))).......(((((.....))))).......((((((((((((....	86.8	21.1	0.136499	1.09923	0.460429	0.982022	10.5956	10.4591	1461.78	1363.37	1562.51	1535.96	1400.95	1482.08
tRNA-Lys-CTT-8-1	Lys	Lys-CTT	AAG	GtRNAdb	chr16:16854263-16854336	+	GCCCAGCTAGCTTAGTTGGTAGAGCATGAGACTCTTAATCTCAGAGTCATGGGTTCAGGCCTCATGTTTGGCACCA	))).)))..))))........((((.))))).......(((((.....))))).......((((((((.(((....	56.1	10.7	0.23926	1.18039	0.26381	0.913493	5.92856	5.6893	46.7718	50.9637	61.979	43.5052	76.9729	57.429
tRNA-Lys-CTT-2-1	Lys	Lys-CTT	AAG	GtRNAdb	chr9:90126508-90126581	-	GCCCGGCTAGCTCAGTCGGTAGAGCATGGGACTCTTAATCCCAGGGTCGTGGGTTCGAGCCCCACGTTGGGCGCCA	)))))))..))))........((((.))))).......(((((.....))))).......((((((((((((....	88	18.7	0.274603	1.20966	0.487801	0.982022	13.9072	13.6326	14752.5	11170.7	13572.3	21921.9	10842.5	9178.58
tRNA-Lys-CTT-4-1	Lys	Lys-CTT	AAG	GtRNAdb	chr3:3149492-3149565	+	GCCCAGCTAGCTCAGTCTGTAGAGCATGAGACTCTTAATCTCAGGGTCGTGAGTTCGAGCCCCACGTTGGGTGCCA	)))))))..))))........((((.))))).......(((((.....))).).......(.((((((((((....	66.7	15.4	0.350499	1.275	0.102372	0.837061	7.08797	6.73747	111.997	97.235	122.719	117.916	167.694	109.16
tRNA-Lys-CTT-5-1	Lys	Lys-CTT	AAG	GtRNAdb	chr5:98041089-98041162	-	GCCCAGATAGCTCAGTGGGTAGAGCATGAGACTCTTAATCTCAGGGTCATGGGTTCATGCCCCATGTTGGGTACCA	))))))...))))........((((.))))).......(((((.....))))).......(((((.((((((....	65.8	14.4	0.38532	1.30615	0.0897266	0.837061	5.87066	5.48534	44.0115	40.9668	53.7515	57.1217	66.3391	46.2552
tRNA-Lys-CTT-14-1	Lys	Lys-CTT	AAG	GtRNAdb	chr16:47250545-47250618	+	CCCCGGCTAGCTCAGTCAGTAGAGCTTGAGAATCTTAATCTCAGGGTCGTGGGTTGGAGCCCCACGTTGGGCGCCA	.))))))..))))........((((.))))).......(((((.....))))).......(((((((((((.....	52	12.4	0.449601	1.36566	0.0837515	0.837061	5.11188	4.66227	26.7851	27.5424	24.9056	25.2556	48.4084	27.6958
tRNA-Lys-CTT-12-1	Lys	Lys-CTT	AAG	GtRNAdb	chr3:3123739-3123812	+	GCCCAGCTAGCTCAGTCTGTAGAGCATGAGACTCTTAGTCTCAGGGTCATGGGTTGGAGCCCCATGTTGTGCACCA	)).))))..))))........((((.))))).......(((((.....))))).......(((((((((.((....	51.7	14.9	0.452138	1.36807	0.044104	0.7333	5.54735	5.09521	37.4685	29.6234	39.0064	46.3302	46.3617	42.9126
tRNA-Lys-CTT-3-1	Lys	Lys-CTT	AAG	GtRNAdb	chr3:96428234-96428307	+	GCCCGGCTAGCTCAGTCGGTAGAGCATGAGACTCTTAATCTCAGGGTCGTGGGTTCGAGCCCCACGTTGGGCGCCA	)))))))..))))........((((.))))).......(((((.....))))).......((((((((((((....	87.8	19	0.575856	1.49056	0.0442508	0.7333	14.928	14.3522	23466.1	18905.1	22713.2	35767.8	26787.6	25031.8
tRNA-Lys-CTT-13-1	Lys	Lys-CTT	AAG	GtRNAdb	chr2:86140983-86141060	-	GCCTAGCTAGTTCAGTCGGTAGAGCATGAGACTCTTAATCTCAGGTTCATGAGTTTGAGCCCCATGTTGGTTTGGCACCA	)))))))..))))........((((.))))).......(((((.....))).).......(.((((((((....((....	51.2	10.2	0.614437	1.53096	0.00325648	0.194891	11.8323	11.2179	2683.42	2318.05	2413.84	3337.52	4240.76	2912.87
tRNA-Met-CAT-4-1	Met	Met-CAT	ATG	GtRNAdb	chr13:23317465-23317538	+	GCCTTCTTAGCGCAGTAGGCAGCGCGTCAGTCTCATAATCTGAAGGTCCTGAGTTCGAGCCTCAGAGAAGGCACCA	)))))))..))))........((((.)))).........((((.....))))).......((((((((((((....	76.9	24.4	-0.0384225	0.973719	0.826199	0.991657	7.96053	7.99895	281.448	263.958	252.402	165.941	291.34	273.966
tRNA-Met-CAT-3-1	Met	Met-CAT	ATG	GtRNAdb	chr13:21326716-21326789	-	GCCTTCTTAGCGCAGTAGGCAGCGCGTCAGTCTCATAATCTGAAGGTCCTGAGTTCGAACCTCAGAGAGGGCACCA	)))))))..))))........((((.)))).........((((.....))))).......((((((((((((....	77.1	22.6	0.0193414	1.0135	0.907493	0.991657	9.16771	9.14837	587.126	609.728	573.597	447.199	591.757	635.985
tRNA-Met-CAT-5-1	Met	Met-CAT	ATG	GtRNAdb	chr15:88641531-88641604	+	GCCTCCTTAGCGCAGTAGGCAGCCCGTCAGTCTCATAATCTGAAGGTCCTGAGTTCAAACCTCAGAGGGGGCACCA	)))))))..).))........((.(.)))).........((((.....))))).......((((((((((((....	67.8	21.3	0.128521	1.09317	0.698952	0.991657	7.51286	7.38434	165.516	187.492	168.491	71.7553	275.056	203.134
tRNA-Met-CAT-2-1	Met	Met-CAT	ATG	GtRNAdb	chr13:21167603-21167676	+	GCCTCCTTAGCGCAGTAGGCAGCGCGTCAGTCTCATAATCTGAAGGTCCTGAGTTCGAACCTCAGAGGGGGCACCA	)))))))..))))........((((.)))).........((((.....))))).......((((((((((((....	77.4	22.4	0.137161	1.09974	0.377067	0.982022	10.2476	10.1104	1203.18	1166.86	1076.07	969.261	1244.11	1322.65
tRNA-Met-CAT-1-1	Met	Met-CAT	ATG	GtRNAdb	chr8:121579228-121579301	-	GCCTCGTTAGCGCAGTAGGTAGCGCGTCAGTCTCATAATCTGAAGGTCGTGAGTTCGATCCTCACACGGGGCACCA	)))))))..))))........((((.)))).........((((.....))))).......((((((((((((....	82.3	21.4	0.176323	1.13	0.391661	0.982022	12.2679	12.0915	5293.95	4251.16	4023.61	4178.3	4918.26	5181.41
mtdbD00002047-Met-CAT	Met	Met-CAT	ATG	mttRNAdb	chrM	.	AGTAAGGTCAGCTAATTAAGCTATCGGGCCCATACCCCGAAAACGTTGGTTTAAATCCTTCCCGTACTACCA	((((.((..((((.....)))).(((((.......)))))....(..((.......))..))).))))....	.	.	0.317318	1.24601	0.136892	0.837061	10.6218	10.3045	1145.83	1384.22	1421.78	1618.39	1670.09	1197.22
tRNA-Met-CAT-6-1	Met	Met-CAT	ATG	GtRNAdb	chr5:109723478-109723551	-	GCCTCCTTAGCATAGTAGGCAGCGCATCAGTCTCATAATCTGAAGGTCCTGAGTTTGAACCTCAGAGGGGTCACCA	).)))))..)).)........(.((.)))).........((((.....))))).......((((((((((.(....	53.1	11.3	0.512887	1.4269	0.0372075	0.7333	5.97675	5.46386	48.6631	43.9863	45.1027	44.5787	89.164	50.903
tRNA-Phe-GAA-2-1	Phe	Phe-GAA	TTC,TTT	GtRNAdb	chr19:12008544-12008617	+	GCTGAAATAGCTCAGTTGGGAGAGCGTTAGACTGAAGATCTAAAGGTCCCTGGTTCGATCCCGGGTTTCAGCACCA	)))))))..))))........((((.))))).......(((((.....))))).......((((((((((((....	87.2	22	-0.14107	0.906846	0.517959	0.982022	13.4307	13.5718	11113.6	14705.1	12257.7	7899.63	12164.8	12317.9
tRNA-Phe-GAA-1-1	Phe	Phe-GAA	TTC,TTT	GtRNAdb	chr5:125406054-125406127	-	GCCGAAATAGCTCAGTTGGGAGAGCGTTAGACTGAAGATCTAAAGGTCCCTGGTTCGATCCCGGGTTTCGGCACCA	)))))))..))))........((((.))))).......(((((.....))))).......((((((((((((....	88.9	20.5	-0.137001	0.909407	0.538122	0.982022	14.2073	14.3443	19606.1	24430.8	20967.4	13278.9	20613.3	21654.8
tRNA-Phe-GAA-3-1	Phe	Phe-GAA	TTC,TTT	GtRNAdb	chr13:21882884-21882957	-	GCCGAAATAGCTCAGTTGGGAGAGCGTTAGACTGAAGATCTAAAGGTCCCTGGTTCAATCCCGGGTTTCGGCACCA	)))))))..))))........((((.))))).......(((((.....))))).......((((((((((((....	87.9	20.5	-0.132394	0.912316	0.547646	0.982022	13.7944	13.9268	14501.5	18572.7	15607	10148	15094.1	16427.5
mtdbD00002042-Phe-GAA	Phe	Phe-GAA	TTC,TTT	mttRNAdb	chrM	.	GTTAATGTAGCTTAATAACAAAGCAAAGCACTGAAAATGCTTAGATGGATAATTGTATCCCATAAACACCA	(((.(((..((((.......)))).(((((.......)))))....(((((....)))))))).)))....	.	.	-0.0671261	0.954538	0.743316	0.991657	9.60211	9.66924	722.585	1070.85	755.049	612.914	971.728	679.215
tRNA-Pro-TGG-3-1	Pro	Pro-TGG	CCA,CCG	GtRNAdb	chr11:67291138-67291210	+	GGTTTGTTGGTCTAGTGGTATGATTCTCAGTTTGGGTTTGAGAGGTCCTGGGTTCAAATCCCAGACGAGCCCCCA	)))))))..))).........(((.))))).......(((((.....))))).......((((((((((((....	55.7	17.9	-0.493909	0.710099	0.0351744	0.7333	4.32371	4.81762	29.8521	29.9498	28.3998	13.108	23.9372	20.8196
tRNA-Pro-TGG-2-1	Pro	Pro-TGG	CCA,CCG	GtRNAdb	chr3:51358353-51358425	+	GGCTCGTTGGTCTAGGGGTATGATTCTCGCTTTGGGTGCGAGAGGTCCCGGGTTCAAATCCCGGACGAGCCCCCA	)))))))..))).........(((.))))).......(((((.....))))).......((((((((((((....	70.3	26.4	-0.387612	0.764394	0.13612	0.837061	13.9733	14.3609	22755.4	20756.1	22036.2	9221.17	17464	21128.4
tRNA-Pro-AGG-1-1	Pro	Pro-AGG	CCA,CCC,CCT	GtRNAdb	chr1:165641633-165641705	+	GGCTCGTTGGTCTAGGGGTATGATTCTCGCTTAGGGTGCGAGAGGTCCCGGGTTCAAATCCCGGACGAGCCCCCA	)))))))..))).........(((.))))).......(((((.....))))).......((((((((((((....	70.2	26.4	-0.358492	0.77998	0.156078	0.837061	13.6146	13.9731	17947.5	15506.8	16611.1	7550.23	13168.2	16466.9
tRNA-Pro-CGG-1-1	Pro	Pro-CGG	CCG	GtRNAdb	chr1:165642270-165642342	-	GGCTCGTTGGTCTAGGGGTATGATTCTCGCTTCGGGTGCGAGAGGTCCCGGGTTCAAATCCCGGACGAGCCCCCA	)))))))..))).........(((.))))).......(((((.....))))).......((((((((((((....	70.2	26.4	-0.340884	0.789558	0.182674	0.837061	14.1311	14.472	25642.4	21565.8	23523.1	11069.4	18223	23825.4
tRNA-Pro-TGG-4-1	Pro	Pro-TGG	CCA,CCG	GtRNAdb	chrX:14702615-14702687	-	GGCTCGTTGGTCTAGGGGTATGATTCTCACTTTGGGTGTGAGAGGTCCTGGGTTCAAATCCCAGGTGAGCCCCCA	)))))))..))).........(((.))))).......(((((.....))))).......((((((((((((....	55.7	22.7	-0.321349	0.800321	0.162476	0.837061	11.9731	12.2945	5833.74	4603.99	5187.45	2700.99	3826.58	5308.9
tRNA-Pro-TGG-1-1	Pro	Pro-TGG	CCA,CCG	GtRNAdb	chr7:98815414-98815486	+	GGCTCGTTGGTCTAGGGGTATGATTCTCGGTTTGGGTCCGAGAGGTCCCGGGTTCAAATCCCGGACGAGCCCCCA	)))))))..))).........(((.))))).......(((((.....))))).......((((((((((((....	70.5	26.2	-0.283981	0.821322	0.201934	0.867568	13.1301	13.4141	11880.6	10696.7	11423.5	6122.53	9348.25	10901.3
mtdbD00002063-Pro-TGG	Pro	Pro-TGG	CCA,CCG	mttRNAdb	chrM	.	CAAGAAGTAGTTTAATTAGAATACCAGCTTTGGGTGCTGGTGGTGGGGAGTAGCTCCTTCTTCTTGACCA	(((((((..((((.....))))((((((.......))))))...(((((.....))))))))))))....	.	.	-0.0551605	0.962487	0.798153	0.991657	12.6201	12.6753	6043.22	6878.02	7512.72	4729.07	7855.51	5818.03
tRNA-SeC-TCA-1-1	SeC	SeC-TCA	TGA,TGG	GtRNAdb	chr7:19301243-19301330	+	GCCCGGATGATCCTCAGTGGTCTGGGGTGCAGGCTTCAAACCTGTAGCTGTTTAGCGACAGAGTGGTTCAATTCCACCTTTCGGGCGCCA	))))))).)..))))))....(((((()))))).......((((((.)))))....(((((.)))).......(((((.(((((((....	146.4	0	0.354499	1.27854	0.0337254	0.7333	10.3485	9.99401	1147.67	986.631	1041.13	1184.47	1268.05	1301.51
tRNA-Ser-GCT-5-1	Ser	Ser-GCT	AGC,AGT	GtRNAdb	chr13:21492844-21492926	-	GATGAGGTGGCCGAGTGGTTAAGGCGATGGACTGCTAATCCATTGTGCTCTGCACGCATGGGTTCGAATCCCATCCTCATCGCCA	)))))))..)))..........(((.))))).......(((((.))))...((((..))))).......((((((((((((....	88	31.9	-0.411775	0.751698	0.0437073	0.7333	10.9462	11.358	2544.33	3006.65	2647.13	1190.8	2372.9	2282.52
tRNA-Ser-GCT-2-1	Ser	Ser-GCT	AGC,AGT	GtRNAdb	chr2:119046749-119046831	-	GACGAGGTGGCCGAGTGGTTAAGGCGATGGACTGCTAATCCATTGTGCTCTGCACGCATGGGTTCGAATCCCATCCTCGTCGCCA	)))))))..)))..........(((.))))).......(((((.))))...((((..))))).......((((((((((((....	89.7	30.4	-0.366807	0.775497	0.0921475	0.837061	11.5221	11.8889	3772.67	4241.57	3824.76	1725.69	3577.73	3427.12
tRNA-Ser-GCT-4-1	Ser	Ser-GCT	AGC,AGT	GtRNAdb	chr11:69063041-69063123	-	GACGAGGTGGCCGAGTGGTTAAGGCGATGGACTGCTAATCCATTGTGCTCTGCACGCGTGGGTTCGAATCCCATCCTCGTCGCCA	)))))))..)))..........(((.))))).......(((((.))))...((((..))))).......((((((((((((....	88.4	26.8	-0.348664	0.785311	0.118366	0.837061	12.1186	12.4672	5807.32	6221.73	5637.39	2685.74	5290.09	5204.58
tRNA-Ser-GCT-1-1	Ser	Ser-GCT	AGC,AGT	GtRNAdb	chr13:21994189-21994271	-	GACGAGGTGGCCGAGTGGTTAAGGCGATGGACTGCTAATCCATTGTGCTCTGCACGCGTGGGTTCGAATCCCACCTTCGTCGCCA	)))))))..)))..........(((.))))).......(((((.))))...((((..))))).......((((((((((((....	91	27.6	-0.347519	0.785935	0.103934	0.837061	11.8528	12.2003	4710.45	5273.05	4706.29	2283.29	4426.88	4238.28
tRNA-Ser-GCT-3-1	Ser	Ser-GCT	AGC,AGT	GtRNAdb	chr19:5038303-5038385	-	GACGAGGTGGCCGAGTGGTTAAGGCGATGGACTGCTAATCCATTGTGCTTTGCACGCGTGGGTTCGAATCCCATCCTCGTCGCCA	)))))))..)))..........(((.))))).......(((((.))))...((((..))))).......((((((((((((....	89.1	27	-0.251261	0.840162	0.162515	0.837061	10.508	10.7592	1745.74	1954.57	1709.74	955.644	1690.16	1646.09
tRNA-Ser-TGA-1-1	Ser	Ser-TGA	TCA,TCG	GtRNAdb	chr10:63429475-63429557	-	GCAGCGATGGCCGAGTGGTTAAGGCGTTGGACTTGAAATCCAATGGGGTCTCCCCGCGCAGGTTCGAACCCTGCTCGCTGCGCCA	)))))))..)))..........(((.))))).......(((((.))))...((((..))))).......((((((((((((....	94	29.5	-0.208085	0.865686	0.244592	0.898509	10.2374	10.4455	1370.39	1520.83	1461.72	775.296	1403.58	1382.91
mtdbD00002059-Ser-GCT	Ser	Ser-GCT	AGC,AGT	mttRNAdb	chrM	.	AAGAAAGATTGCAAGAACTGCTAATTCATGCTTCCATGTTTAAAAACATGGCTTTCTTACCA	(((((((....((.(((.......))).))...(((((........))))))))))))....	.	.	-0.154846	0.898228	0.777827	0.991657	12.3868	12.5416	10312.5	4368.6	3679.19	7086.48	4684.05	3009.86
tRNA-Ser-AGA-2-1	Ser	Ser-AGA	TCA,TCC,TCT	GtRNAdb	chr4:10874063-10874145	+	GTAGTCGTGGCCGAGTGGTTAAGGCGATGGACTAGAAATCCATTGGGGTCTCCCCGCGCAGGTTCGAATCCTGCCGACTACGCCA	)))))))..)))..........(((.))))).......(((((.))))...((((..))))).......((((((((((((....	89.6	32.7	-0.143572	0.905275	0.439765	0.982022	11.1907	11.3342	2661.65	2752.65	2639.18	1525.45	2597.86	2769.8
tRNA-Ser-CGA-1-1	Ser	Ser-CGA	TCG	GtRNAdb	chr11:69110918-69111000	+	GCTGTGATGGCCGAGTGGTTAAGGCGTTGGACTCGAAATCCAATGGGGTCTCCCCGCGCAGGTTCGAATCCTGCTCACAGCGCCA	)))))))..)))..........(((.))))).......(((((.))))...((((..))))).......((((((((((((....	95.1	29	-0.106937	0.928558	0.515464	0.982022	9.69861	9.80554	927.768	931.056	931.94	569.579	912.863	958.02
tRNA-Ser-CGA-2-1	Ser	Ser-CGA	TCG	GtRNAdb	chr10:128458463-128458545	-	GTCACGGTGGCCGAGTGGTTAAGGCGTTGGACTCGAAATCCAATGGGGTTTCCCCGCACAGGTTCGAATCCTGTTCGTGACGCCA	)))))))..)))..........(((.))))).......(((((.))))...((((..))))).......((((((((((((....	89.6	28.3	-0.0914834	0.938557	0.54431	0.982022	9.73328	9.82477	866.53	954.396	1009.56	677.55	890.973	907.372
tRNA-Ser-GGA-1-1	Ser	Ser-GGA	TCC,TCT	GtRNAdb	chr11:100538157-100538230	+	GCTGAAATAGCTCAGTTGGGAGAGCATTAGACTGGAGATCTAAAGGTCCCTGGTTTGATCCCGGGTTTCGGCACCA	)))))))..))))........((((.))))).......(((((.....))))).......((((((((((((....	77.6	17.5	-0.0708716	0.952063	0.719968	0.991657	8.41523	8.4861	331.389	417.135	371.8	214.87	428.824	363.165
tRNA-Ser-CGA-3-1	Ser	Ser-CGA	TCG	GtRNAdb	chr13:22022418-22022500	-	GCTGTGATGGCCGAGTGGTTAAGGCGTTGGACTCGAAATCCAATGGGTTCTTCCCGCGCAGGTTCAAATCCTGCTCACAGCGCCA	)))))))..)))..........(((.))))).......(((((..))......((..))))).......((((((((((((....	90.1	28.2	-0.00186362	0.998709	0.980341	1	7.89033	7.89219	241.373	265.672	234.683	154.924	260.418	281.224
tRNA-Ser-TGA-2-1	Ser	Ser-TGA	TCA,TCG	GtRNAdb	chr13:21924934-21925016	-	GTAGTCGTGGCCGAGTGGTTAAGGCGATGGACTTGAAATCCATTGGGGTTTCCCCGCGCAGGTTCGAATCCTGCCGACTACGCCA	)))))))..)))..........(((.))))).......(((((.))))...((((..))))).......((((((((((((....	90.4	32.9	0.0239714	1.01675	0.884666	0.991657	10.633	10.609	1606.6	1641.41	1623.35	1249.16	1519.7	1853.93
tRNA-Ser-AGA-1-1	Ser	Ser-AGA	TCA,TCC,TCT	GtRNAdb	chr13:21937093-21937175	-	GTAGTCGTGGCCGAGTGGTTAAGGCGATGGACTAGAAATCCATTGGGGTTTCCCCGCGCAGGTTCGAATCCTGCCGACTACGCCA	)))))))..)))..........(((.))))).......(((((.))))...((((..))))).......((((((((((((....	90.3	32.8	0.0249869	1.01747	0.879393	0.991657	10.5647	10.5397	1535.65	1588.36	1519.32	1177.97	1467.74	1767.02
tRNA-Ser-AGA-3-1	Ser	Ser-AGA	TCA,TCC,TCT	GtRNAdb	chrX:166909732-166909814	-	GTAGTCGTGGCCAAGTGAGTAAGGCAATGGACTAGAAATCCATTGGGGTCTCCCAGCACAGGTTCAAATCCTGCTGACTATGCCA	)))))))..)))..........(((.))))).......(((((..)))...(((....)))).......((((.(((((((....	56.6	24.6	0.029364	1.02056	0.938518	0.99879	6.69723	6.66787	95.6904	114.985	106.66	48.8727	137.795	121.702
mtdbD00002053-Ser-TGA	Ser	Ser-TGA	TCA,TCG	mttRNAdb	chrM	.	GAGAAAGACATATAGGATATGAGATTGGCTTGAAACCAATTTTAGGGGGTTCGATTCCTTCCTTTCTTACCA	(((((((.((((.....)))).((((((.......)))))*...(((((.......))))))))))))....	.	.	0.0901624	1.06449	0.698773	0.991657	15.0007	14.9106	29012	31423.8	35738	32082.4	30167.3	31438.4
tRNA-Sup-TCA-1-1	Sup	Sup-TCA	TGA,TGG	GtRNAdb	chr5:5627680-5627751	+	ACCCAGCTAGCTCAGTGGGTAGAGCATGAGACTCAATCTCAGGGTTGTGGGTTCGAGCCCCACATTGGGCGCCA	.)))))...))))........((((.))))).....(((((.....))))).......(((((.(((((.....	58.6	13.1	-0.0464824	0.968294	0.85536	0.991657	6.2239	6.27038	78.3619	84.3818	78.2606	70.8513	82.579	63.382
tRNA-Thr-AGT-7-1	Thr	Thr-AGT	ACA,ACC,ACT	GtRNAdb	chr14:58818152-58818226	-	GGCACCGTGGCTTAGTTGGTTAAAGCGCCTGTCTAGTAAACAGGAGATCCTGGGTTCGAATTCCAGCGGTGCCTCCA	)))))))..)))).........((((.))))).......(((((.....))))).......((((((((((((....	75.6	23.2	-0.132363	0.912336	0.557828	0.982022	4.86385	4.99621	36.6507	27.012	35.6113	21.0181	28.7425	34.1581
tRNA-Thr-AGT-6-1	Thr	Thr-AGT	ACA,ACC,ACT	GtRNAdb	chr13:21249193-21249267	-	GGCTCTGTGGCTTAGCTGGTTAAAGCGCCTGTCTAGTAAACAGGAGATCCTGGGTTCAAATCCCAGCAGGGCCTCCA	)))))))..)))).........((((.))))).......(((((.....))))).......((((((((((((....	79.7	21.3	-0.0862169	0.94199	0.639454	0.991657	6.12432	6.21053	80.9688	77.4452	73.2051	55.9352	75.1932	71.5316
tRNA-Thr-CGT-2-1	Thr	Thr-CGT	ACG	GtRNAdb	chr11:79704649-79704721	+	GGCGCGGTGGCCAAGTGGTAAGGCGTCGGTCTCGTAAACCGAAGATCGCGGGTTCGAACCCCGTCCGTGCCTCCA	)))))))..))).........(((.))))).......(((((.....))))).......((((((((((((....	78.3	20.1	-0.0485549	0.966904	0.772388	0.991657	9.90037	9.94892	1089.71	962.924	1026.04	869.934	884.076	997.303
tRNA-Thr-AGT-4-1	Thr	Thr-AGT	ACA,ACC,ACT	GtRNAdb	chr13:21856020-21856094	+	GGCTCCGTGGCTTAGCTGGTTAAAGCGCCTGTCTAGTAAACAGGAGATCCTGGGTTCAAATCCCAGCGGGGCCTCCA	)))))))..)))).........((((.))))).......(((((.....))))).......((((((((((((....	80.4	21	-0.0388824	0.973409	0.814749	0.991657	8.82645	8.86533	515.307	485.971	452.762	326.063	486.175	516.16
tRNA-Thr-CGT-1-1	Thr	Thr-CGT	ACG	GtRNAdb	chr16:13437322-13437394	+	GGCGCGGTGGCCAAGTGGTAAGGCGTCGGTCTCGTAAACCGAAGATCACGGGTTCGAACCCCGTCCGTGCCTCCA	)))))))..))).........(((.))))).......(((((.....))))).......((((((((((((....	79.6	23.6	-0.022109	0.984792	0.902425	0.991657	10.4979	10.52	1599.44	1472.23	1503.13	1357.87	1270.45	1521.93
tRNA-Thr-AGT-2-1	Thr	Thr-AGT	ACA,ACC,ACT	GtRNAdb	chr13:23450621-23450695	+	GGCTCCGTGGCTTAGCTGGTTAAAGCGCCTGTCTAGTAAACAGGAGATCCTGGGTTCGAATCCCAGCGGGGCCTCCA	)))))))..)))).........((((.))))).......(((((.....))))).......((((((((((((....	81.4	20.9	-0.0187482	0.987089	0.910444	0.991657	9.16652	9.18526	664.364	588.469	560.884	459.912	546.908	663.235
tRNA-Thr-AGT-5-1	Thr	Thr-AGT	ACA,ACC,ACT	GtRNAdb	chr13:22030099-22030173	-	GGCCTTGTGGCTTAGCTGGTCAAAGCGCCTGTCTAGTAAACAGGAGATCCTGGGTTCGAATCCCAGCAAGGCCTCCA	)))))))..)))).........((((.))))).......(((((.....))))).......((((((((((((....	81.9	22.7	-0.0139473	0.990379	0.918067	0.995288	6.61378	6.62773	108.521	102.335	98.1107	73.5068	98.819	112.152
mtdbD00002062-Thr-TGT	Thr	Thr-TGT	ACA,ACG	mttRNAdb	chrM	.	GTCTTGATAGTATAAACATTACTCTGGTCTTGTAAACCTGAAATGAAGATCTTCTCTTCTCAAGACACCA	(((((((..(((.......)))((.(((.......))).))...(((((.....))))))))))))....	.	.	-0.000664591	0.999539	0.997561	1	12.5983	12.5989	5811.35	6443.21	7120.28	4533.12	7350.78	6275.04
tRNA-Thr-TGT-1-1	Thr	Thr-TGT	ACA,ACG	GtRNAdb	chr13:21275955-21276029	+	GGCTCCATGGCTTAGTTGGTTAAAGCGCCTGTCTTGTAAACAGGAGATCCTGGGTTCGAATCCCAGTGGGGCCTCCA	)))))))..)))).........((((.))))).......(((((.....))))).......((((((((((((....	83.6	21.3	0.00302327	1.0021	0.991292	1	7.5787	7.57568	200.889	189.573	204.176	158.879	191.72	203.739
tRNA-Thr-TGT-2-1	Thr	Thr-TGT	ACA,ACG	GtRNAdb	chr14:51088649-51088722	+	GGCCCTATAGCTCAGGGGTTAGAGCACTGGTCTTGTAAACCAGGGGTCGCGAGTTCAAATCTCGCTGGGGCCTCCA	)))))))..))))........((((.))))).......(((((.....))))).......((((((((((((....	78	23.2	0.0224443	1.01568	0.892006	0.991657	10.833	10.8105	1942.23	1958.25	1698.88	1563.13	1854.38	1859.5
tRNA-Thr-AGT-3-1	Thr	Thr-AGT	ACA,ACC,ACT	GtRNAdb	chr11:69110464-69110538	+	GGCGCCGTGGCTTAGCTGGTTAAAGCGCCTGTCTAGTAAACAGGAGATCCTGGGTTCGAATCCCAGCGGTGCCTCCA	)))))))..)))).........((((.))))).......(((((.....))))).......((((((((((((....	80.1	21	0.0310545	1.02176	0.847821	0.991657	10.6578	10.6267	1666.61	1683.19	1580.85	1233.23	1667.95	1812.71
tRNA-Thr-AGT-1-1	Thr	Thr-AGT	ACA,ACC,ACT	GtRNAdb	chr7:35234769-35234843	-	GGCGCCGTGGCTTAGTTGGTTAAAGCGCCTGTCTAGTAAACAGGAGATCCTGGGTTCGAATCCCAGCGGTGCCTCCA	)))))))..)))).........((((.))))).......(((((.....))))).......((((((((((((....	82.6	21	0.0312271	1.02188	0.84626	0.991657	10.666	10.6348	1663.03	1716.97	1579.26	1253.34	1668.58	1815.41
tRNA-Thr-TGT-3-1	Thr	Thr-TGT	ACA,ACG	GtRNAdb	chr11:48853618-48853691	+	GGCTCCATAGCTCAGGGGTTAGAGCACTGGTCTTGTAAACCAGGGGTCGCGAGTTCAAATCTCGCTGGGGCCTCCA	)))))))..))))........((((.))))).......(((((.....))))).......((((((((((((....	78.8	24.1	0.0357733	1.02511	0.829233	0.991657	10.8935	10.8577	2013.38	2010.64	1761.04	1645.85	1914.18	1938.77
tRNA-Thr-CGT-4-1	Thr	Thr-CGT	ACG	GtRNAdb	chr13:21264579-21264653	+	GGCTCCGTGGCTTAGTTGGCTAAAGCGCCTGTCTCGTAAACAGGAGATCCTGGGTTCGAATCCCAGTGGGGCCTCCA	)))))))..)))).........((((.))))).......(((((.....))))).......((((((((((((....	76.5	18.2	0.0813653	1.05802	0.647108	0.991657	7.4812	7.39984	182.282	159.46	184.301	152.551	173.879	190.878
tRNA-Thr-CGT-3-1	Thr	Thr-CGT	ACG	GtRNAdb	chr13:21322812-21322886	+	GGCTCCATGGCTTAGCTGGTTAAAGCGCCTGTCTCGTAAACAGGAGATCCTGGGTTCGACTCCCAGTGGGGCCTCCA	)))))))..)))).........((((.))))).......(((((.....))))).......((((((((((((....	78.2	21.2	0.111942	1.08068	0.592002	0.982022	6.34482	6.23288	89.4542	73.4873	72.4617	67.2352	83.2464	85.2839
tRNA-Trp-CCA-3-1	Trp	Trp-CCA	TGG	GtRNAdb	chr11:69041825-69041897	+	GGCCTCGTGGCGCAACGGTAGCGCGTCTGACTCCAGATCAGAAGGTTGCGTGTTCAAATCACGTCGGGGTCACCA	)))))))..)))).......((((.))))).......(((((.....))))).......((((((((((((....	73.4	20.4	-0.0830588	0.944054	0.678435	0.991657	10.6289	10.712	1610.07	1959.67	1670.56	956.04	1902.21	1832.82
tRNA-Trp-CCA-4-1	Trp	Trp-CCA	TGG	GtRNAdb	chr13:23498105-23498177	+	GACCTCGTGGCGCAACGGTAGCGCGTCTGACTCCAGATCAGAAGGTTGCGTGTTCAAATCACGTCGGGGTCACCA	)))))))..)))).......((((.))))).......(((((.....))))).......((((((((((((....	73.3	22.7	-0.0741142	0.949925	0.718778	0.991657	10.9097	10.9838	1861.06	2300.87	2167.46	1144.3	2289.43	2270.9
tRNA-Trp-CCA-2-1	Trp	Trp-CCA	TGG	GtRNAdb	chr10:91181411-91181483	-	GACCTCGTGGCGCAACGGTAGCGCGTCTGACTCCAGATCAGAAGGCTGCGTGTTCGAATCACGTCGGGGTCACCA	)))))))..)))).......((((.))))).......(((((.....))))).......((((((((((((....	74.3	22.7	-0.0632696	0.957093	0.753777	0.991657	11.6577	11.7209	3382.29	3689.99	3462.7	2027.91	3919.35	3606.31
tRNA-Trp-CCA-6-1	Trp	Trp-CCA	TGG	GtRNAdb	chr10:23777082-23777154	-	GACCTCGTGGCACAATGGTAGCACGTCTGACTCCAGATCAGAAGGTTGCGTGTTCAAATCACGTCGGGGTCACCA	)))))))..)..).......(..(.))))).......(((((.....))))).......((((((((((((....	63.4	14.8	-0.0515064	0.964928	0.771848	0.991657	10.3058	10.3573	1279.45	1535.44	1282.73	833.095	1431.12	1465.2
tRNA-Trp-CCA-1-1	Trp	Trp-CCA	TGG	GtRNAdb	chr11:62746014-62746086	-	GACCTCGTGGCGCAATGGTAGCGCGTCTGACTCCAGATCAGAAGGTTGCGTGTTCAAATCACGTCGGGGTCACCA	)))))))..)))).......((((.))))).......(((((.....))))).......((((((((((((....	75.7	22.7	-0.0307949	0.978881	0.870907	0.991657	10.5618	10.5926	1508.76	1725.75	1586.97	930.615	1781.14	1760.5
tRNA-Trp-CCA-5-1	Trp	Trp-CCA	TGG	GtRNAdb	chr11:61407915-61407987	-	GACCTCGTGGCGCAATGGTAGCGCGTCTGACTCCAGATCAGAAGGTTGCGTGTTCAAGTCACGTCGGGGTCACCA	)))))))..)))).......((((.))))).......(((((.....))))).......((((((((((((....	75.1	22.7	-0.000701099	0.999514	0.995358	1	10.9624	10.9631	2054.84	2234.85	1939.59	1395.55	2197.87	2264.75
mtdbD00002048-Trp-TCA	Trp	Trp-TCA	TGA,TGG	mttRNAdb	chrM	.	AGAAGTTTAGGATATACTAGTCCGCGAGCCTTCAAAGCCCTAAGAAAACACACAAGTTTAACTTCTGCCA	(((((((..((((......))))..(.((.......)).).....((((......)))))))))))....	.	.	0.356743	1.28053	0.119379	0.837061	10.0649	9.70819	685.168	866.179	1064.03	812.247	1461.86	855.323
tRNA-Tyr-GTA-5-1	Tyr	Tyr-GTA	TAC,TAT	GtRNAdb	chr13:23428737-23428826	-	CTTTCGATAGTTCAGTTGGTAGAGCGGAGGACTGTAGATCCTTAGGTCGCTGGTTCGAGTCCGGCTCGAAGGACCA	)))))))..))))........((((.))))).......(((((.....))))).......((((((((((((....	66.4	20.3	-0.274335	0.826831	0.182601	0.837061	8.89435	9.16868	635.483	629.926	528.941	295.327	498.811	610.326
tRNA-Tyr-GTA-1-1	Tyr	Tyr-GTA	TAC,TAT	GtRNAdb	chr13:23425645-23425734	-	CCTTCGATAGCTCAGTTGGTAGAGCGGAGGACTGTAGATCCTTAGGTCGCTGGTTCGAATCCGGCTCGAAGGACCA	)))))))..))))........((((.))))).......(((((.....))))).......((((((((((((....	78	27.9	-0.0510158	0.965256	0.81469	0.991657	11.8779	11.9289	3713.83	4566.41	3902.57	2349.67	4857.35	3927.74
tRNA-Tyr-GTA-4-1	Tyr	Tyr-GTA	TAC,TAT	GtRNAdb	chr3:19628354-19628447	+	CCTTCGATAGCTCAGCTGGTAGAGCGGAGGACTGTAGATCCTTAGGTCGCTGGTTCGACTCCGGCTCGAAGGACCA	)))))))..))))........((((.))))).......(((((.....))))).......((((((((((((....	72.5	27.9	-0.0482038	0.96714	0.812984	0.991657	11.6127	11.6609	3222.19	3683.22	3203.63	1965.19	3861.15	3434.31
tRNA-Tyr-GTA-2-1	Tyr	Tyr-GTA	TAC,TAT	GtRNAdb	chr5:30888082-30888171	+	CCTTCGATAGCTCAGTTGGTAGAGCGGAGGACTGTAGATCCTTAGGTCGCTGGTTCGATTCCGGCTCGAAGGACCA	)))))))..))))........((((.))))).......(((((.....))))).......((((((((((((....	77.9	27.8	-0.0142111	0.990198	0.950955	1	12.8935	12.9077	7331.21	9048.73	7631	4877.61	9648.18	7952.64
tRNA-Tyr-GTA-3-1	Tyr	Tyr-GTA	TAC,TAT	GtRNAdb	chr3:19628781-19628870	+	CCTTCGATAGCTCAGCTGGTAGAGCGGAGGACTGTAGATCCTTAGGTCGCTGGTTCGATTCCGGCTCGAAGGACCA	)))))))..))))........((((.))))).......(((((.....))))).......((((((((((((....	75.5	27.9	-0.000770476	0.999466	0.997278	1	12.9415	12.9423	7510.32	9313.99	7769.09	5020.27	10066.1	8158.93
mtdbD00002052-Tyr-GTA	Tyr	Tyr-GTA	TAC,TAT	mttRNAdb	chrM	.	GGTAAAATGGCTGAGTAAGCATTAGACTGTAAATCTAAACACAGAGGTTTAAATCCTCTTTTTACCACCA	(((((((..(((.....))).(((((.......)))))....(((((.......))))))))))))....	.	.	0.406975	1.3259	0.0802075	0.837061	12.5814	12.1744	4460.34	4526.26	5438.59	6212.2	6353.34	4892.41
tRNA-Val-TAC-1-1	Val	Val-TAC	GTA,GTG	GtRNAdb	chr19:12011930-12012003	+	GGTTCCATAGTGTAGCGGTTATCACGTCTGCTTTACACGCAGAAGGTCCTGGGTTCGAGCCCCAGTGGAACCACCA	)))))))..)))..........(((.))))).......(((((.....))))).......((((((((((((....	80.5	28.2	-0.111049	0.925914	0.579485	0.982022	12.8021	12.9131	7183.43	8665.21	8253.44	5906.81	7433.14	7378
tRNA-Val-CAC-4-1	Val	Val-CAC	GTG	GtRNAdb	chr6:10100370-10100443	+	GTTTCTGTAGTGTAGTGGTTATCACGTTCGCCTCACACGCGAAAGGTCCCCGGTTCGAAACCGGGCAGAAACACCA	)))))))..)))..........(((.))))).......(((((.....))))).......((((((((((((....	78.7	30.5	0.0346316	1.0243	0.837495	0.991657	8.8197	8.78507	428.051	466.793	481.607	431.775	422.773	442.496
mtdbD00002043-Val-TAC	Val	Val-TAC	GTA,GTG	mttRNAdb	chrM	.	CATAGTGTAGCTTAATATTAAAGCATCTGGCCTACACCCAGAAGATTTCATGACCAATGAACACTCTGACCA	((.((((..((((.......)))).(((((.......)))))....(((((.....))))))))).))....	.	.	0.140656	1.10241	0.600851	0.982022	13.0372	12.8966	6567.06	9047.14	8247.55	8776.74	9185.49	5910.47
tRNA-Val-AAC-4-1	Val	Val-AAC	GTA,GTC,GTT	GtRNAdb	chr13:23298780-23298853	+	GTTTCTGTAGTGTAGTGGTTATCACGCTCGCCTAACACGCGAGAGGTCCCCGGTTCGAAACCGGGCAGAAACACCA	)))))))..)))..........(((.))))).......(((((.....))))).......((((((((((((....	78.4	30.5	0.21444	1.16025	0.373798	0.982022	11.5579	11.3434	2621.88	2686.83	2797.31	3457.02	2438.57	2578.86
tRNA-Val-CAC-7-1	Val	Val-CAC	GTG	GtRNAdb	chr3:59474925-59474997	-	GTTTCTGTAGTGTAGTGGTTTCACATTTGCCTCACATGCAAAAGGTCCCCGGTTCTCAACCGGGCAGAAACACCA	)))))))..))).........(((.))))).......(((((.....))))).......((((((((((((....	55.4	30	0.245827	1.18577	0.220447	0.882453	6.05648	5.81066	58.8353	63.776	53.3054	53.0537	72.1677	68.1571
tRNA-Val-AAC-2-1	Val	Val-AAC	GTA,GTC,GTT	GtRNAdb	chr13:23285400-23285473	+	GTTTCCGTAGTGTAGTGGTCATCACGCTCGCCTAACACGCGAGAGGTCCCCGGTTCGAAACCGGGCGGAAACACCA	)))))))..)))..........(((.))))).......(((((.....))))).......((((((((((((....	79.1	30.1	0.249035	1.18841	0.173029	0.837061	10.4073	10.1583	1061.23	1152.37	1353.72	1331.6	1256.88	1294.79
tRNA-Val-AAC-3-1	Val	Val-AAC	GTA,GTC,GTT	GtRNAdb	chr13:23401072-23401145	-	GTTTCCGTAGTGTAGTGGTCATCACGCTCGCCTAACACGCGAGAGGTCCCCGGTTCGAAACCGGGCGGGAACACCA	)))))))..)))..........(((.))))).......(((((.....))))).......((((((((((((....	78.7	28.4	0.262421	1.19949	0.123544	0.837061	10.4164	10.154	1080.35	1170.9	1304.95	1296.45	1328.47	1295.3
tRNA-Val-CAC-3-1	Val	Val-CAC	GTG	GtRNAdb	chr13:23300121-23300194	+	GTTTCCGTAGTGTAGTGGTCATCACGCTCGCCTCACACGCGAGAGGTCCCCGGTTCGAAACCGGGCGGGAACACCA	)))))))..)))..........(((.))))).......(((((.....))))).......((((((((((((....	78.7	28.4	0.286077	1.21932	0.10032	0.837061	10.5804	10.2944	1175.73	1346.19	1399.72	1476.69	1455.99	1452.5
tRNA-Val-CAC-2-1	Val	Val-CAC	GTG	GtRNAdb	chr1:171111442-171111515	+	GTTTCCGTAGTGTAGTGGTTATCACGTTCGCCTCACACGCGAAAGGTCCCCGGTTCGAAACCGGGCGGAAACACCA	)))))))..)))..........(((.))))).......(((((.....))))).......((((((((((((....	79.4	30.1	0.348403	1.27315	0.14609	0.837061	12.3602	12.0118	3853.69	4052.82	4987.24	5622.67	4334.2	4933.26
tRNA-Val-AAC-1-1	Val	Val-AAC	GTA,GTC,GTT	GtRNAdb	chr3:30601269-30601342	+	GTTTCCGTAGTGTAGTGGTTATCACGTTCGCCTAACACGCGAAAGGTCCCCGGTTCGAAACCGGGCGGAAACACCA	)))))))..)))..........(((.))))).......(((((.....))))).......((((((((((((....	79.4	30.1	0.364593	1.28752	0.112948	0.837061	12.1278	11.7632	3271.26	3360.13	4219.03	4682.28	3723.8	4298.48
tRNA-Val-AAC-5-1	Val	Val-AAC	GTA,GTC,GTT	GtRNAdb	chr13:22015790-22015863	-	GTTTCCGTAGTGTAGTGGTTATCACATTCGCCTAACACGCGAAAGGTCCCCGGTTCGAAACCGGGCGGAAACACCA	)))))))..)))..........(((.))))).......(((((.....))))).......((((((((((((....	78.1	30	0.388479	1.30901	0.0821442	0.837061	11.9412	11.5527	2799.56	2897.71	3681.27	4060.67	3320.43	3797.92
tRNA-Val-CAC-1-1	Val	Val-CAC	GTG	GtRNAdb	chr13:23307628-23307701	+	GTTTCCGTAGTGTAGTGGTTATCACGCTCGCCTCACACGCGAGAGGTCCCCGGTTCGAAACCGGGCGGAAACACCA	)))))))..)))..........(((.))))).......(((((.....))))).......((((((((((((....	79.1	30.1	0.400274	1.31976	0.0591698	0.837061	11.8014	11.4011	2508.81	2640.28	3294.75	3609.8	3132.62	3426.26
